# Supplementary material for: Early detection of Cercospora beticola and powdery mildew diseases in sugar beet using uncrewed aerial vehicle-based remote sensing and machine learning
Source: PeerJ. 2025 Jun 3;13:e19530. doi: 10.7717/peerj.19530 (PMC12143290; doi:10.7717/peerj.19530)
Supplement: Supplemental Information 1 [file peerj-13-19530-s001.xlsx]

## Sheet: Chart
Date/Time	Average air temperature [°C]	Average relative humidity [%]	Total precipitation [mm]	Leaf wetness [saat]	Wind speed [km/h]	ET0 [mm]
2022-06-09	24.73	57.91	7.8	4.33333	6.8
2022-06-10	22.37	66.29	0	11.0833	4.8	5.4
2022-06-11	20.12	84.94	8	16.3333	4.5	2.3
2022-06-12	19.39	90.28	11.2	19.6667	3.9	2.4
2022-06-13	20.81	81.26	0	4.91667	4.7	3.9
2022-06-14	21.64	78.78	0	9.16667	7	5.6
2022-06-15	21.39	77.93	0	8.08333	9.2	5.6
2022-06-16	20.7	72.7	0	5.25	7.5	4.8
2022-06-17	20.98	72.11	0	2.58333	7.7	5.7
2022-06-18	20.56	71.1	0	5	9.2	5.9
2022-06-19	21.15	69.28	0	0	7.2	4.4
2022-06-20	19.93	83.1	1	12	6.2	4.6
2022-06-21	21.1	79.37	6.8	14	4.5	4.4
2022-06-22	22.8	66.22	0	4.58333	7.2	6.5
2022-06-23	23.4	64.63	9.2	2.16667	5.9	5.7
2022-06-24	20.61	69.36	15.6	9.08333	5.9	4.8
2022-06-25	20.06	76.05	0	10.4167	7.6	5.4
2022-06-26	20.18	71.12	0	0	7.1	5.7
2022-06-27	19.86	77.93	0.6	0	6.3	4.1
2022-06-28	21.58	79.32	14.4	7.41667	8.1	5.3
2022-06-29	21.4	80.43	6.4	1.33333	4.5	3.9
2022-06-30	21.43	78.84	0	0	8.1	6
2022-07-01	22.56	73.5	0	0	8.1	6.4
2022-07-02	22.35	70.33	0	0	9.8	6.7
2022-07-03	21.23	67.1	0	0	9.7	6.9
2022-07-04	20.38	63.7	0	0	10.1	7
2022-07-05	19.94	65.7	0	0	9	6.7
2022-07-06	21.36	71.63	0	0	7.5	6.3
2022-07-07	22.61	72.88	0	0	6.9	5.9
2022-07-08	22.6	76.39	0	0	8.4	6.1
2022-07-09	21.1	81.86	8.2	6.33333	6.5	4.9
2022-07-10	19.23	87.01	0.4	18.2167	3.5	2.6
2022-07-11	19.62	78.91	0	1.38333	5.9	4.7
2022-07-12	21.06	71.78	0	0.166667	7.7	6.2
2022-07-13	20.16	73.59	0	0	7.3	4.6
2022-07-14	20.68	66.27	0	0	8.4	6.6
2022-07-15	20.51	72.59	127	8	9	6.3
2022-07-16	20.84	71.79	28.2	14.2167	10.9	6.5
2022-07-17	21.67	72.04	0	5.38333	9.2	6.2
2022-07-18	21.49	66.72	0	1.88333	9.6	6.1
2022-07-19	19.33	70.32	0	1.8	9.2	5.8
2022-07-20	20.35	67.26	0	2.3	9.7	6.2
2022-07-21	20.72	64.1	0	0.833333	7.1	6.3
2022-07-22	21.39	63.78	0	0.75	6.8	6.1
2022-07-23	21.66	59.88	0	0	7.4	6.7
2022-07-24	21.91	60.23	0	0	7.7	6.8
2022-07-25	22.06	63.59	0	0	8.9	6.6
2022-07-26	22.98	65.68	0	0	7.9	6.4
2022-07-27	22.4	62.43	0	0	7.9	6.9
2022-07-28	22.92	61.93	0	0	9.4	7.1
2022-07-29	23.17	69.03	0	0	8.7	6.5
2022-07-30	23.34	70.09	0	0	7.8	6.3
2022-07-31	23.27	75.39	0	0	7.7	5.2
2022-08-01	24.19	71.52	0.6	0	8.6	6.1
2022-08-02	22.78	66.23	0	0	9.3	6.3
2022-08-03	22.78	69.95	0	0	8.6	6.3
2022-08-04	22.83	76.22	44.4	9.08333	8.3	4.6
2022-08-05	23.9	71.9	23.6	15.3833	8.8	5.4
2022-08-06	23.93	72.48	0.6	6.38333	9.3	5.9
2022-08-07	23.83	72.8	0	4.88333	9.5	6
2022-08-08	24.28	70.49	0	3.71667	9.8	5.9
2022-08-09	24.9	70.59	0	4.38333	7.9	5.2
2022-08-10	23.41	74.55	0	8	8.3	4.7
2022-08-11	22.92	81	3	9.88333	6.2	3.9
2022-08-12	22.35	78.77	0	9.8	6.8	5.4
2022-08-13	21.27	91.38	0.8	23.6333	6.7	3
2022-08-14	23.19	81.9	0.6	13.7167	5.9	5.3
2022-08-15	22.36	83.75	0.2	10.1333	4.7	3.8
2022-08-16	22.48	72.44	0.2	9	6.6	5.9
2022-08-17	23.67	71.37	0	8.91667	8.1	6.1
2022-08-18	24.16	71.85	0	7.58333	7.9	6.1
2022-08-19	23.47	75.61	0	6.08333	8.1	5.3
2022-08-20	23.56	77.75	0	7.55	7.9	5.7
2022-08-21	24.05	78.25	0	5.75	8.1	5.5
2022-08-22	23.73	86.86	0	6	5.2	4.3
2022-08-23	24.81	82.64	0	10.9667	5.8	5.3
2022-08-24	24.1	89.62	9.4	13.7167	5.2	2.9
2022-08-25	21.38	86.86	17.8	15.4667	4	3.5
2022-08-26	21.5	91.35	1	13.3	3.7	3.2
2022-08-27	23.06	84.13	0.2	9.71667	5	4.8
2022-08-28	24.48	79.53	0	8.63333	6.5	5.3
2022-08-29	24.08	80.46	0	7.46667	6.3	5.1
2022-08-30	25.11	83.49	0.2	7.86667	6.7	5
2022-08-31	23.33	92.66	5.2	13.9667	5.3	3.2
2022-09-01	23.69	85.19	0.2	13.7167	5.9	4.4
2022-09-02	23.73	83.17	0	9.8	4.8	4.6
2022-09-03	23.55	91.27	0.2	10.55	5.6	3.6
2022-09-04	23.28	85.52	0	2.66667	7.9	4.3
2022-09-05	19.28	87.21	0	7.05	8.2	2.3
2022-09-06	17.62	88.47	0	4.13333	6.5	2.4
2022-09-07	19.98	74.69	0	3.08333	9.2	4.1
2022-09-08	18.2	73.07	0	1.71667	7.9	5
2022-09-09	18.6	73.26	0	0.633333	7.1	5.2
2022-09-10	20.14	72.94	0	0.633333	6.5	5.5
2022-09-11	21.36	75.79	0	0.516667	6.9	4.8
2022-09-12	18.81	91.33	0	2.05	6.2	2.1
2022-09-13	16.46	84.3	0	2.18333	6	3.2
2022-09-14	16.31	74.56	0.2	0.633333	6	4.2
2022-09-15	17.96	71.52	0	0	6.1	4.8
2022-09-16	21.25	70.87	0	0.166667	6.1	5.1
2022-09-17	20.64	78.36	65	6.58333	6.7	5.2
2022-09-18	20.52	79.21	0.2	13.05	8.2	4.6
2022-09-19	19.84	67.4	0	0	8	4
2022-09-20	15.74	81.62	0	9.38333	9
			418.4	568.217
		2023-07-20	244.8	207.1

## Sheet: MS Combined
Date/Time	Average air temperature [°C]	Average relative humidity [%]	Total precipitation [mm]	Leaf wetness [saat]	NDVI	GS-S1	GS-S2	GS-S3	MS1	MS2	MS3
2022-06-09	24.73	57.91	7.8	4.33333	62	75.9	75.9333	76.1333	23.06	23.5717	22.2567
2022-06-10	22.37	66.29	0	11.0833
2022-06-11	20.12	84.94	8	16.3333
2022-06-12	19.39	90.28	11.2	19.6667
2022-06-13	20.81	81.26	0	4.91667
2022-06-14	21.64	78.78	0	9.16667
2022-06-15	21.39	77.93	0	8.08333
2022-06-16	20.7	72.7	0	5.25	63	75.9	75.9333	76.1333	23.06	23.5717	22.2567
2022-06-17	20.98	72.11	0	2.58333
2022-06-18	20.56	71.1	0	5
2022-06-19	21.15	69.28	0	0	65
2022-06-20	19.93	83.1	1	12
2022-06-21	21.1	79.37	6.8	14
2022-06-22	22.8	66.22	0	4.58333
2022-06-23	23.4	64.63	9.2	2.16667	65
2022-06-24	20.61	69.36	15.6	9.08333
2022-06-25	20.06	76.05	0	10.4167
2022-06-26	20.18	71.12	0	0		77.2667	76.9	77.3667	24.3417	24.2467	25.2017
2022-06-27	19.86	77.93	0.6	0
2022-06-28	21.58	79.32	14.4	7.41667
2022-06-29	21.4	80.43	6.4	1.33333	69
2022-06-30	21.43	78.84	0	0
2022-07-01	22.56	73.5	0	0
2022-07-02	22.35	70.33	0	0
2022-07-03	21.23	67.1	0	0	71	81.8667	81.1667	82.2	14.3233	14.365	14.7433
2022-07-04	20.38	63.7	0	0
2022-07-05	19.94	65.7	0	0
2022-07-06	21.36	71.63	0	0
2022-07-07	22.61	72.88	0	0
2022-07-08	22.6	76.39	0	0	73.89
2022-07-09	21.1	81.86	8.2	6.33333
2022-07-10	19.23	87.01	0.4	18.2167
2022-07-11	19.62	78.91	0	1.38333
2022-07-12	21.06	71.78	0	0.166667
2022-07-13	20.16	73.59	0	0
2022-07-14	20.68	66.27	0	0
2022-07-15	20.51	72.59	127	8	73.89	80.2667	80.1667	79.6667	27.49	27.35	26.8417
2022-07-16	20.84	71.79	28.2	14.2167
2022-07-17	21.67	72.04	0	5.38333
2022-07-18	21.49	66.72	0	1.88333
2022-07-19	19.33	70.32	0	1.8
2022-07-20	20.35	67.26	0	2.3	80.84	75.8667	76.2333	76.9333	18.59	16.88	17.4817
2022-07-21	20.72	64.1	0	0.833333
2022-07-22	21.39	63.78	0	0.75
2022-07-23	21.66	59.88	0	0	73
2022-07-24	21.91	60.23	0	0
2022-07-25	22.06	63.59	0	0
2022-07-26	22.98	65.68	0	0
2022-07-27	22.4	62.43	0	0
2022-07-28	22.92	61.93	0	0	65.06
2022-07-29	23.17	69.03	0	0
2022-07-30	23.34	70.09	0	0		71.2	73.2333	71.1333	23.15	22.7367	24.506
2022-07-31	23.27	75.39	0	0
2022-08-01	24.19	71.52	0.6	0
2022-08-02	22.78	66.23	0	0	56.64
2022-08-03	22.78	69.95	0	0
2022-08-04	22.83	76.22	44.4	9.08333
2022-08-05	23.9	71.9	23.6	15.3833
2022-08-06	23.93	72.48	0.6	6.38333	56.64
2022-08-07	23.83	72.8	0	4.88333
2022-08-08	24.28	70.49	0	3.71667
2022-08-09	24.9	70.59	0	4.38333
2022-08-10	23.41	74.55	0	8
2022-08-11	22.92	81	3	9.88333		72.7667	71.6333	72.5	19.63	16.5917	18.2467
2022-08-12	22.35	78.77	0	9.8	52.48
2022-08-13	21.27	91.38	0.8	23.6333
2022-08-14	23.19	81.9	0.6	13.7167
2022-08-15	22.36	83.75	0.2	10.1333
2022-08-16	22.48	72.44	0.2	9
2022-08-17	23.67	71.37	0	8.91667
2022-08-18	24.16	71.85	0	7.58333	40.75	72.5667	71.9333	72.5	18.235	20.765	18.95
2022-08-19	23.47	75.61	0	6.08333
2022-08-20	23.56	77.75	0	7.55
2022-08-21	24.05	78.25	0	5.75
2022-08-22	23.73	86.86	0	6	59.22
2022-08-23	24.81	82.64	0	10.9667
2022-08-24	24.1	89.62	9.4	13.7167
2022-08-25	21.38	86.86	17.8	15.4667		69.5667	70.9333	69.5	14.245	15.5883	17.1817
2022-08-26	21.5	91.35	1	13.3
2022-08-27	23.06	84.13	0.2	9.71667	46.29
2022-08-28	24.48	79.53	0	8.63333
2022-08-29	24.08	80.46	0	7.46667
2022-08-30	25.11	83.49	0.2	7.86667
2022-08-31	23.33	92.66	5.2	13.9667
2022-09-01	23.69	85.19	0.2	13.7167
2022-09-02	23.73	83.17	0	9.8
2022-09-03	23.55	91.27	0.2	10.55
2022-09-04	23.28	85.52	0	2.66667
2022-09-05	19.28	87.21	0	7.05
2022-09-06	17.62	88.47	0	4.13333
2022-09-07	19.98	74.69	0	3.08333
2022-09-08	18.2	73.07	0	1.71667
2022-09-09	18.6	73.26	0	0.633333	46.29	62.4333	65.5333	63.6333	21.824	23.2183	21.9067
2022-09-10	20.14	72.94	0	0.633333
2022-09-11	21.36	75.79	0	0.516667
2022-09-12	18.81	91.33	0	2.05
2022-09-13	16.46	84.3	0	2.18333
2022-09-14	16.31	74.56	0.2	0.633333	19.09	63.6333	63.3667	66.0333	18.8767	19.2283	21.3033
2022-09-15	17.96	71.52	0	0
2022-09-16	21.25	70.87	0	0.166667
2022-09-17	20.64	78.36	65	6.58333
2022-09-18	20.52	79.21	0.2	13.05
2022-09-19	19.84	67.4	0	0
2022-09-20	15.74	81.62	0	9.38333	10.33
			418.4	568.217
		2023-07-20	244.8	207.1
