# Supplementary material for: Early detection of Cercospora beticola and powdery mildew diseases in sugar beet using uncrewed aerial vehicle-based remote sensing and machine learning
Source: PeerJ. 2025 Jun 3;13:e19530. doi: 10.7717/peerj.19530 (PMC12143290; doi:10.7717/peerj.19530)
Supplement: Supplemental Information 2 [file peerj-13-19530-s002.xlsx]

## Sheet: MS_CLS
	2022-06-16				2022-06-26				2022-07-03				2022-07-15				2022-07-20				2022-07-30				2022-08-11				2022-08-18				2022-08-25				2022-09-09				2022-09-14
		Min	Max			Min	Max			Min	Max			Min	Max			Min	Max			Min	Max			Min	Max			Min	Max			Min	Max			Min	Max			Min	Max
Green		0.86	0.97			0.91	0.97			0.89	0.97			0.9	0.97			0.89	0.98			0.77	0.89			0.86	0.97			0.85	0.95			0.8	0.94			0.82	0.98			0.81	96
Yellow		0.76	0.86			0.85	0.91			0.83	0.89			0.83	0.9			0.81	0.89			0.68	0.77			0.78	0.86			0.78	0.85			0.72	0.8			0.7	0.82			0.69	0.81
Orange1		0.66	0.76			0.79	0.85			0.77	0.83			0.77	0.83			0.73	0.81			0.59	0.68			0.7	0.78			0.7	0.78			0.64	0.72			0.59	0.7			0.56	0.69
Orange2		0.56	0.66			0.73	0.79			0.72	0.77			0.7	0.77			0.65	0.73			0.5	0.59			0.61	0.7			0.63	0.7			0.56	0.64			0.47	0.59			0.44	0.56
Red		0.45	0.56			0.64	0.73			0.64	0.72			0.59	0.7			0.56	0.65			0.38	0.5			0.53	0.61			0.55	0.63			0.48	0.56			0.35	0.47			0.32	0.44
	T1P1	T1P2	T1P3		T1P1	T1P2	T1P3		T1P1	T1P2	T1P3	PM	T1P1	T1P2	T1P3		T1P1	T1P2	T1P3	1.Spray (24.07.2022)	T1P1	T1P2	T1P3		T1P1	T1P2	T1P3	2. Spray (12.08.2022)	T1P1	T1P2	T1P3		T1P1	T1P2	T1P3	3. Spray (27.08.2022)	T1P1	T1P2	T1P3		T1P1	T1P2	T1P3	4. Spray (15.09.2022)
Green	19.05	17.04	27.01		25.34	20.74	26.64		11.47	12.54	14.62		32.51	27.69	29.1		20.89	17.9	15.41		27.51	20.36	19.51		15.91	31.58	16		16.95	25.72	13.21		12.58	26.51	10.53		21.82	15.07	8.86		15.37	11.72	6.4
Yellow	52.37	51.88	44.54		44.12	48.69	45.04		28.79	38.97	42.08		33.03	39.06	37.87		41.15	42.08	43.39		54.11	55.79	50.68		50.66	45.71	46.01		41.35	43.92	36.34		46.12	51.26	33.12		47.49	41.62	36.46		42.34	35.46	29.66
Orange1	18.72	22.3	17.37		22.58	23.87	21.27		34.82	22.47	31.02		22.78	23.45	22.52		25.07	28.41	30.3		12.56	16.72	20.89		24.42	18.14	27.32		27.7	21.75	29.52		27.72	16.56	30.95		19.44	25.01	29.63		25.48	26.43	29.24
Orange2	5.72	6.43	6.78		5.73	5.37	5.31		12.05	11.42	9.98		9.69	8.08	7.35		9.88	9.11	9.16		3.77	4.06	5.18		6.53	3.69	8.56		10.52	6.94	14.86		9.67	4.22	17.85		6.28	10.85	14.72		10.36	14.63	18.49
Red	3.24	2.26	4.3		2.24	1.33	1.73		2.87	3.6	2.3		2	1.72	3.16		3.01	2.5	1.75		2.05	3.06	3.73		2.48	0.89	2.11		3.48	1.66	6.08		3.91	1.45	7.55		4.97	7.45	10.33		6.45	11.76	16.22
	T2P2	T2P3	T2P1		T2P2	T2P3	T2P1		T2P2	T2P3	T2P1		T2P2	T2P3	T2P1		T2P2	T2P3	T2P1		T2P2	T2P3	T2P1		T2P2	T2P3	T2P1		T2P2	T2P3	T2P1		T2P2	T2P3	T2P1		T2P2	T2P3	T2P1		T2P2	T2P3	T2P1
Green	30.61	22.41	25.33		22.93	21.83	23		12.49	17.2	13.53		31.85	26.1	28.77		18.48	17.11	16.58		19.22	24.71	21.91		7.87	21.24	18.52		15.08	22.75	18.74		17.45	19.65	14.34		31.14	22.89	16.48		20.62	15.42	13.65
Yellow	50.59	49.51	54.56		43.01	44.61	32.03		37.66	41.9	39.63		27.73	32.36	37.13		38.8	40.62	46.52		43.41	54.36	49.79		37.29	50.34	45.52		43.63	46.67	43.18		52.87	52.48	56.01		37.43	41.72	50.43		44.57	45.28	44.39
Orange1	13.14	19.7	15.93		24.83	25.21	26.7		32.5	29.63	33.57		23.11	25.64	23.65		27.04	29.25	27.03		19.71	15.64	18.59		34.73	22.51	28.56		27.38	23.57	26.74		21.2	23.07	23.05		16.08	22.26	23.36		19.92	25.95	27.04
Orange2	3.78	5.99	3.07		7.37	6.9	14		12.9	8.69	11.24		14.25	13.34	7.36		11.59	10.14	7.08		9.33	3.74	5.48		14.39	5.02	8.15		9.79	5.77	8.92		6.37	3.99	5.1		8	8.12	6.91		7.73	9.69	10.44
Red	1.9	2.39	1.11		1.87	1.46	3.46		4.45	2.59	2.03		3.05	2.57	3.1		4.09	2.88	1.8		8.33	1.56	4.23		5.63	0.88	2.25		4.13	1.23	2.42		2.1	0.94	1.5		7.35	5.01	2.82		7.17	3.65	4.47
	T3P2	T3P1	T3P3		T3P2	T3P1	T3P3		T3P2	T3P1	T3P3		T3P2	T3P1	T3P3		T3P2	T3P1	T3P3		T3P2	T3P1	T3P3		T3P2	T3P1	T3P3		T3P2	T3P1	T3P3		T3P2	T3P1	T3P3		T3P2	T3P1	T3P3		T3P2	T3P1	T3P3
Green	24	21.18	23.41		16.98	23.1	25.44		11.83	16.12	15.94		35.31	27.62	24.96		17.36	19.28	19.15		22.72	30.24	22.76		12.75	30.63	27.62		18.21	18.56	25.95		10.24	19.4	25.92		32.08	22.12	22.2		27.82	19.75	31.89
Yellow	43.52	33.59	42.56		39.21	42.86	43.13		34.88	39.44	46.24		32.08	34.01	32.47		38.83	41.86	47.97		53.21	54.08	47.33		49.62	48.53	46.28		48.78	43.38	46.76		47.91	43	42.58		46.25	48.52	53.61		56	47.73	45.85
Orange1	16.75	20.84	18.14		31.17	20.37	21.32		28.97	29.04	27.78		21.46	26.23	20.69		27	27.26	23.69		16.56	10.38	14.56		29.56	17.23	19.65		25.73	25.78	20.83		32.77	25.69	23.77		14.41	16.52	18.75		13.47	19.27	16.8
Orange2	8.01	12.71	9.29		9.89	5.21	5.78		13.72	10.24	7.62		7.87	10.45	8.44		12.04	8.98	6.84		4.69	2.9	5.82		6.63	3.05	5.09		5.76	9.33	5.16		8.04	9.18	6.55		4.3	6.09	4.18		1.88	8.05	4.29
Red	7.72	11.07	6.61		2.75	8.45	4.32		10.61	5.17	2.42		3.27	1.69	13.44		4.78	2.61	2.35		2.81	2.4	9.52		1.44	0.56	1.36		1.52	2.95	1.29		1.04	2.73	1.19		2.96	6.77	1.25		0.83	5.2	1.17
	T4P1	T4P3	T4P2		T4P1	T4P3	T4P2		T4P1	T4P3	T4P2		T4P1	T4P3	T4P2		T4P1	T4P3	T4P2		T4P1	T4P3	T4P2		T4P1	T4P3	T4P2		T4P1	T4P3	T4P2		T4P1	T4P3	T4P2		T4P1	T4P3	T4P2		T4P1	T4P3	T4P2
Green	27.21	13.42	30.32		18.65	21.48	28.98		10.45	14.47	17.18		26.31	24.52	21.69		19.78	15.94	16.11		19.35	25.23	21.03		20.69	15.51	15.48		19.96	18.17	18.67		21.81	18.33	16.45		31.42	22.12	16.94		27.46	25.2	11.13
Yellow	46.42	34.97	46.7		41.37	43.97	43.62		35.34	39.58	45.68		37.24	42.76	35.58		42.19	39.82	44.72		49.53	53.73	48.42		50.85	49.47	45.65		31.72	45.11	39.39		52.41	42.33	44.83		48.11	54.39	47.82		45.11	52.5	47.05
Orange1	15.81	26.8	16.5		28.1	23.55	21.01		30.46	30.03	26.75		24.97	24.4	27.58		25.37	29.09	26.6		16.43	15.42	17.8		23.53	26.99	26.91		33.16	26.42	26.22		20.21	28.4	24.33		17.26	16.97	22.05		24.07	15.75	24.37
Orange2	6.12	14.06	4.81		7.88	6.55	5		13.28	11.11	7.29		7.88	6.47	9.93		9.38	11.22	9.3		6.65	4.1	6.1		4.13	6.43	9.4		15.61	7.82	11.06		4.49	9.15	9.73		2.54	4.37	8.15		2.82	4.44	9.81
Red	4.44	10.75	1.67		3.99	4.45	1.38		10.46	4.81	3.1		3.6	1.85	5.22		3.28	3.92	3.28		8.04	2.51	6.66		0.79	1.6	2.66		1.65	2.49	4.66		1.08	1.78	4.66		0.67	2.15	5.04		0.53	2.11	7.64
	T5P3	T5P2	T5P1		T5P3	T5P2	T5P1		T5P3	T5P2	T5P1		T5P3	T5P2	T5P1		T5P3	T5P2	T5P1		T5P3	T5P2	T5P1		T5P3	T5P2	T5P1		T5P3	T5P2	T5P1		T5P3	T5P2	T5P1		T5P3	T5P2	T5P1		T5P3	T5P2	T5P1
Green	26.45	18.82	24.32		27.19	25.6	29.94		13.05	15.76	15.95		27.93	21.85	25.32		17.88	18.22	16.69		30.32	29.43	18.49		21.47	13.42	15.15		17.09	22.73	20.32		16.41	12.8	12.31		30.17	21.85	23.84		23.17	22.21	18.83
Yellow	52.52	45.17	45.88		43.07	41.06	39.03		40.46	41.13	45.54		37.86	41.56	38.46		40.85	41.09	46.15		49.09	51.42	42.09		53.25	43.71	41.3		50.38	43.82	40.59		43.41	46.97	40.88		48.8	51.22	48.83		60.9	49.06	52.27
Orange1	14.41	22.4	15.82		22.61	20.25	21.28		30.4	29.18	28.53		23.74	25.97	23.12		27.49	27.47	26.38		12.1	12.81	16.62		20.99	28.64	27.82		24.84	24.92	24.78		24.55	29.19	28.05		14.93	18.8	17.21		13.06	17.85	17.72
Orange2	4.41	7.96	5.55		5.83	6.01	6.11		11.18	9.53	7.88		8.04	8.52	7.69		10.36	10.09	8.15		4.48	3.63	7.02		3.61	10.15	10.98		5.86	7.16	10.04		10.71	8.61	12.44		3.94	5.53	5.57		1.95	7.02	6.7
Red	2.21	5.65	8.44		1.3	7.07	3.64		4.91	4.4	2.1		2.44	2.1	5.42		3.43	3.13	2.63		4.01	2.71	15.77		0.68	4.08	4.75		1.83	1.37	4.26		4.92	2.43	6.31		2.16	2.59	4.56		0.91	3.87	4.47
	T6P3	T6P1	T6P2		T6P3	T6P1	T6P2		T6P3	T6P1	T6P2		T6P3	T6P1	T6P2		T6P3	T6P1	T6P2		T6P3	T6P1	T6P2		T6P3	T6P1	T6P2		T6P3	T6P1	T6P2		T6P3	T6P1	T6P2		T6P3	T6P1	T6P2		T6P3	T6P1	T6P2
Green	20.84	21.27	20.64		28.63	26.02	30.25		13.18	18.42	16.39		28.44	24.41	25.71		19.4	18.32	13.21		23,,29	21.4	23.66		16.54	14.52	17.31		16.53	14.88	24.18		12.25	5.03	10.08		25.2	15.26	22.23		25.74	18.2	21.87
Yellow	39.08	50.38	52.92		39.48	43.48	40.34		42.36	45.43	41		38.88	39.77	39.6		42.67	42.81	42.96		48	50.8	47.83		50.69	40.77	41.6		47.1	37.87	41.26		44.3	27.38	39.11		48.86	41.55	46.15		53.55	44.68	45.54
Orange1	27.7	18.04	19.21		21.25	22.19	21.1		31.86	25.39	28.81		23.57	25.37	24.07		25.68	27.51	29.68		16	17.26	15.32		24.74	27.54	26.24		27.7	27.86	22.04		27.38	35.79	30.42		17.19	22.87	20		14.72	19.63	20.04
Orange2	10.7	6.12	5.17		6.15	5.72	5.68		10.19	7.53	9.71		7.21	7.82	7.26		9.24	8.82	10.83		6.52	5.45	6.34		6.41	12.03	11.17		6.86	13.57	8.89		11.26	21.9	13.94		6.28	10.31	7.49		3.95	9.17	8.1
Red	1.68	4.19	2.06		4.48	2.58	2.64		2.42	3.23	4.08		1.9	2.62	3.37		3.02	2.54	3.32		6.18	5.1	6.85		1.63	5.15	3.67		1.81	5.82	3.64		4.8	9.9	6.45		4.47	10.01	4.13		2.04	8.31	4.45
	2022-06-16				2022-06-26				2022-07-03				2022-07-15				2022-07-20				2022-07-30				2022-08-11				2022-08-18				2022-08-25				2022-09-09				2022-09-14
	1	2	3		1	2	3		1	2	3		1	2	3		1	2	3		1	2	3		1	2	3		1	2	3		1	2	3		1	2	3		1	2	3
Green	23.06	23.5717	22.2567		24.3417	24.2467	25.2017		14.3233	14.365	14.7433		27.49	27.35	26.8417		18.59	16.88	17.4817		23.15	22.7367	24.506		19.2367	16.4017	19.73		18.235	20.765	18.95		14.245	15.5883	17.1817		21.8233	23.2183	21.9067		18.8767	19.2283	21.3033
Yellow	47.2	48.4633	43.8633		40.4817	42.655	43.2167		39.0283	39.8867	42.1033		36.6067	35.935	37.0333		43.4467	41.4133	42.5533		50.0667	50.0133	50.5317		46.2717	43.93	49.34		39.6817	43.4667	45.3933		44.3	47.1583	43.0367		47.4883	45.0817	47.3067		46.0867	46.28	47.9567
Orange1	17.5267	18.3833	20.6867		23.5367	23.705	22.535		30.3017	28.1133	30.12		24.3533	24.2733	23.4267		26.4367	27.7	27.5833		15.3067	16.4867	15.7683		24.85	27.37	23.7		27.67	24.6733	25.48		26.7517	25.745	26.3533		19.4433	19.3917	19.955		22.2017	20.3467	19.2533
Orange2	6.54833	6.02667	8.53833		7.44167	6.55333	6.08667		10.37	10.7617	9.795		8.48167	9.31833	8.475		8.715	10.4933	9.49333		5.21167	5.69167	4.97333		7.47833	9.23833	5.85333		11.3317	8.26667	7.72167		10.4633	8.485	9.91833		6.28333	7.38667	6.935		7.92333	8.195	7.135
Red	5.415	3.54333	4.65667		4.06	2.84	2.95667		4.31	5.04	3.24167		3.07167	3.12167	4.22667		2.645	3.51667	2.89167		6.265	5.07	4.585		2.66333	3.06167	1.37667		3.43	2.83	2.455		4.23833	3.02167	3.53		4.96667	4.92	4.22833		4.905	5.95333	4.35

## Sheet: MS_Chart
		1	2	3				2022-06-16	2022-06-26	2022-07-03	2022-07-15	2022-07-20	2022-07-30	2022-08-11	2022-08-18	2022-08-25	2022-09-09	2022-09-14
2022-06-16	Green	23.06	23.5717	22.2567		Green	1	23.06	24.3417	14.3233	27.49	18.59	23.15	19.63	18.235	14.245	21.824	18.8767	0
	Yellow	47.2	48.4633	43.8633			2	23.5717	24.2467	14.365	27.35	16.88	22.7367	16.5917	20.765	15.5883	23.2183	19.2283	0
	Orange1	17.5267	18.3833	20.6867			3	22.2567	25.2017	14.7433	26.8417	17.4817	24.506	18.2467	18.95	17.1817	21.9067	21.3033	0
	Orange2	6.54833	6.02667	8.53833
	Red	5.415	3.54333	4.65667
2022-06-26	Green	24.3417	24.2467	25.2017
	Yellow	40.4817	42.655	43.2167
	Orange1	23.5367	23.705	22.535
	Orange2	7.44167	6.55333	6.08667
	Red	4.06	2.84	2.95667
2022-07-03	Green	14.3233	14.365	14.7433
	Yellow	39.0283	39.8867	42.1033
	Orange1	30.3017	28.1133	30.12
	Orange2	10.37	10.7617	9.795
	Red	4.31	5.04	3.24167
2022-07-15	Green	27.49	27.35	26.8417
	Yellow	36.6067	35.935	37.0333
	Orange1	24.3533	24.2733	23.4267
	Orange2	8.48167	9.31833	8.475
	Red	3.07167	3.12167	4.22667
2022-07-20	Green	18.59	16.88	17.4817
	Yellow	43.4467	41.4133	42.5533
	Orange1	26.4367	27.7	27.5833
	Orange2	8.715	10.4933	9.49333
	Red	2.645	3.51667	2.89167
2022-07-30	Green	23.15	22.7367	24.506
	Yellow	50.0667	50.0133	50.5317				2022-06-16	2022-06-26	2022-07-03	2022-07-15	2022-07-20	2022-07-30	2022-08-11	2022-08-18	2022-08-25	2022-09-09	2022-09-14
	Orange1	15.3067	16.4867	15.7683		Yellow	1	47.2	40.4817	39.0283	36.6067	43.4467	50.0667	46.3517	39.6817	44.3	47.488	46.0867	0
	Orange2	5.21167	5.69167	4.97333			2	48.4633	42.655	39.8867	35.935	41.4133	50.0133	45.26	43.4667	47.1583	45.0817	46.28	0
	Red	6.265	5.07	4.585			3	43.8633	43.2167	42.1033	37.0333	42.5533	50.5317	49.335	45.3933	43.0367	47.3067	47.9567	0
2022-08-11	Green	19.63	16.5917	18.2467
	Yellow	46.3517	45.26	49.335
	Orange1	24.4233	26.7667	24.135
	Orange2	7.26167	8.61167	6.33
	Red	2.33333	2.775	1.615
2022-08-18	Green	18.235	20.765	18.95
	Yellow	39.6817	43.4667	45.3933
	Orange1	27.67	24.6733	25.48
	Orange2	11.3317	8.26667	7.72167
	Red	3.43	2.83	2.455
2022-08-25	Green	14.245	15.5883	17.1817
	Yellow	44.3	47.1583	43.0367
	Orange1	26.7517	25.745	26.3533
	Orange2	10.4633	8.485	9.91833
	Red	4.23833	3.02167	3.53
2022-09-09	Green	21.824	23.2183	21.9067
	Yellow	47.488	45.0817	47.3067
	Orange1	19.444	19.3917	19.955
	Orange2	6.284	7.38667	6.935				2022-06-16	2022-06-26	2022-07-03	2022-07-15	2022-07-20	2022-07-30	2022-08-11	2022-08-18	2022-08-25	2022-09-09	2022-09-14
	Red	4.966	4.92	4.22833		Orange1	1	17.5267	23.5367	30.3017	24.3533	26.4367	15.3067	24.4233	27.67	26.7517	19.444	22.2017	0
2022-09-14	Green	18.8767	19.2283	21.3033			2	18.3833	23.705	28.1133	24.2733	27.7	16.4867	26.7667	24.6733	25.745	19.3917	20.3467	0
	Yellow	46.0867	46.28	47.9567			3	20.6867	22.535	30.12	23.4267	27.5833	15.7683	24.135	25.48	26.3533	19.955	19.2533	0
	Orange1	22.2017	20.3467	19.2533
	Orange2	7.92333	8.195	7.135
	Red	4.905	5.95333	4.35
	Green
	Yellow
	Orange1
	Orange2
	Red
								2022-06-16	2022-06-26	2022-07-03	2022-07-15	2022-07-20	2022-07-30	2022-08-11	2022-08-18	2022-08-25	2022-09-09	2022-09-14
						Orange2	1	6.54833	7.44167	10.37	8.48167	8.715	5.21167	7.26167	11.3317	10.4633	6.284	7.92333	0
							2	6.02667	6.55333	10.7617	9.31833	10.4933	5.69167	8.61167	8.26667	8.485	7.38667	8.195	0
							3	8.53833	6.08667	9.795	8.475	9.49333	4.97333	6.33	7.72167	9.91833	6.935	7.135	0
								2022-06-16	2022-06-26	2022-07-03	2022-07-15	2022-07-20	2022-07-30	2022-08-11	2022-08-18	2022-08-25	2022-09-09	2022-09-14
						Red	1	5.415	4.06	4.31	3.07167	2.645	6.265	2.33333	3.43	4.23833	4.966	4.905	0
							2	3.54333	2.84	5.04	3.12167	3.51667	5.07	2.775	2.83	3.02167	4.92	5.95333	0
							3	4.65667	2.95667	3.24167	4.22667	2.89167	4.585	1.615	2.455	3.53	4.22833	4.35	0
