# Supplementary material for: Early detection of Cercospora beticola and powdery mildew diseases in sugar beet using uncrewed aerial vehicle-based remote sensing and machine learning
Source: PeerJ. 2025 Jun 3;13:e19530. doi: 10.7717/peerj.19530 (PMC12143290; doi:10.7717/peerj.19530)
Supplement: Supplemental Information 3 [file peerj-13-19530-s003.xlsx]

## Sheet: Metos
	CLS
		NDVI		2022-06-03		2022-07-03		2022-07-08		2022-07-18		2022-07-23		2022-07-28		2022-08-02		2022-08-07		2022-08-12		2022-08-17		2022-08-22		2022-08-27		2022-09-11		2022-09-16		2022-09-21		2022-09-26		2022-10-06		2022-10-11		2022-10-21
		0.9-1
		0.8-0.9			0.51	63.6					0.07	9.06	0.13	15.88	0.18	22.67	0.03	3.28			0.27	33.91											0.01	1.29		1.29			0.06	7.74
		0.7-0.8			0.13	16.01	0.63	73.98	0.65	80.84	0.59	73	0.53	65.06	0.46	56.64	0.56	69.91		52.48	0.33	40.75	0.48	59.22	0.37	46.29	0.15	19.09	0.08	10.33	0.29	36.21	0.41	50.82	0.37	57.38	0.16	19.39	0.44	54.2
		0.6-0.7			0.08	9.6	0.08	9.29	0.05	5.87	0.06	6.99	0.05	5.78	0.09	11.06	0.12	14.79	0.2	25.24	0.11	13.36	0.19	23.86	0.33	40.48	0.4	49.06	0.43	53.21	0.27	33.64	0.16	19.58	0.18	14.53	0.39	48.1	0.17	21.2
		0.5-0.6	0.44	53.93	0.06	6.94	0.04	4.83	0.08	10.41	0.07	9.09	0.08	9.43	0.04	4.73	0.06	7.12	0.45	7.09	0.06	7.07	0.09	10.75	0.07	8.33	0.16	19.95	0.19	23.33	0.2	25.02	0.18	21.9	0.2	15.84	0.18	22.45	0.11	14.01
		0.4-0.5	0.22	26.73	0.02	2.94	0.07	9.06	0.02	1.97	0.01	0.95	0.02	2.94	0.02	3.04	0.02	3.04	0.12	14.28	0.03	3.99	0.03	4.32	0.02	3.04	0.03	3.66	0.03	3.73	0.02	2.3	0.03	3.58	0.03	8.13	0.06	7.22	0.01	0.98
		0.3-0.4	0.09	10.7			0.02	1.92			0.01	0.91	0.01	0.91	0.01	0.95	0.01	0.95	0.03	0.91			0.02	1.86	0.02	1.86	0.06	7.32	0.06	7.54	0.02	1.92	0.02	2.84	0.02	1.89	0.02	2.84	0.02	1.86
		0.2-0.3	0.07	8.64			0.01	0.91							0.01	0.91	0.01	0.91	0.01								0.01	0.91	0.02	1.86	0.01	0.91				0.95
		NDVI	0.9-1	0.8-0.9	0.7-0.8	0.6-0.7	0.5-0.6	0.4-0.5	0.3-0.4	0.2-0.3
		2022-06-03					53.93	26.73	10.7	8.64
		2022-07-03		63.6	16.01	9.6	6.94	2.94
		2022-07-08			73.98	9.29	4.83	9.06	1.92	0.91
		2022-07-18			80.84	5.87	10.41	1.97
		2022-07-23		9.06	73	6.99	9.09	0.95	0.91
		2022-07-28		15.88	65.06	5.78	9.43	2.94	0.91
		2022-08-02		22.67	56.64	11.06	4.73	3.04	0.95	0.91
		2022-08-07		3.28	69.91	14.79	7.12	3.04	0.95	0.91
		2022-08-12			52.48	25.24	7.09	14.28	0.91
		2022-08-17		33.91	40.75	13.36	7.07	3.99
		2022-08-22			59.22	23.86	10.75	4.32	1.86
		2022-08-27			46.29	40.48	8.33	3.04	1.86
		2022-09-11			19.09	49.06	19.95	3.66	7.32	0.91
		2022-09-16			10.33	53.21	23.33	3.73	7.54	1.86
		2022-09-21			36.21	33.64	25.02	2.3	1.92	0.91
		2022-09-26		1.29	50.82	19.58	21.9	3.58	2.84
		2022-10-01			46.42	22.35	25.01	3.37	2.84
		2022-10-06		1.29	57.38	14.53	15.84	8.13	1.89	0.95
		2022-10-11			19.39	48.1	22.45	7.22	2.84
		2022-10-21		7.74	54.2	21.2	14.01	0.98	1.86
	PM
		NDVI		2022-07-03		2022-07-08		2022-07-18		2022-07-23		2022-07-28		2022-08-02		2022-08-07		2022-08-12		2022-08-17		2022-08-22		2022-08-27		2022-09-11		2022-09-16		2022-09-21		2022-09-26		2022-10-01		2022-10-11		2022-10-21
		0.9-1
		0.8-0.9					0.51	20.72	0.99	40.23	1.05	42.62	1.12	45.41			1.65	67.14	0.94	38.28			1.3	52.96
		0.7-0.8	0.03	1.12	0.08	3.19	0.78	31.68	0.47	19.12	0.68	27.75	0.66	26.97	1.67	68.19	0.39	15.84	1.02	41.47	0.24	9.57	0.8	32.41	1.51	61.52	1.12	45.64	1.26	51.18	1.08	44.07	0.67	27.3	0.01	0.4	0.13	5.19
		0.6-0.7	0.24	9.66	1.01	41.07	0.38	15.48	0.5	20.29	0.37	15.02	0.27	11.17	0.41	16.76	0.24	9.63	0.3	12.26	0.75	30.68	0.27	10.88	0.33	13.33	0.61	24.8	0.48	19.68	0.6	24.4	0.87	35.41	1.15	46.72	1.03	41.95
		0.5-0.6	0.82	33.49	0.49	20.09	0.4	16.19	0.17	7.1	0.12	5.01	0.17	7	0.21	8.47	0.13	5.46	0.14	5.55	0.69	28.28	0.07	2.85	0.18	7.46	0.22	8.99	0.21	8.48	0.24	9.66	0.26	10.41	0.52	21.08	0.49	19.96
		0.4-0.5	0.55	22.49	0.18	7.37	0.19	7.68	0.17	7.06	0.11	4.58	0.12	5.03	0.14	5.64	0.03	1.23	0.04	1.74	0.54	21.84	0.01	0.41	0.33	13.54	0.24	9.73	0.21	8.59	0.13	5.46	0.18	7.45	0.23	9.3	0.26	10.62
		0.3-0.4	0.23	9.2	0.31	12.68	0.19	7.76	0.13	5.49	0.11	4.54	0.09	3.71	0.01	0.45	0.01	0.21	0.01	0.21	0.18	7.15			0.08	3.14	0.23	9.44	0.27	10.88	0.29	11.65	0.19	7.76	0.2	8.08	0.2	8.3
		0.2-0.3	0.24	9.95	0.36	14.8	0.01	0.49	0.02	0.7	0.01	0.3	0.01	0.51	0.01	0.49	0.01	0.49	0.01	0.49	0.06	2.26			0.03	1.02	0.03	1.4	0.02	0.69	0.12	4.77	0.28	11.36	0.34	13.93	0.33	13.29
			0.35	14.09	0.02	0.8					0	0.19	0	0.19							0.01	0.21							0.01	0.49			0.01	0.3	0.01	0.49	0.02	0.7
		NDVI	0.9-1	0.8-0.9	0.7-0.8	0.6-0.7	0.5-0.6	0.4-0.5	0.3-0.4	0.2-0.3
		2022-07-03			1.12	9.66	33.49	22.49	9.2	9.95
		2022-07-08			3.19	41.07	20.09	7.37	12.68	14.8
		2022-07-18		20.72	31.68	15.48	16.19	7.68	7.76	0.49
		2022-07-23		40.23	19.12	20.29	7.1	7.06	5.49	0.7
		2022-07-28		42.62	27.75	15.02	5.01	4.58	4.54	0.3
		2022-08-02		45.41	26.97	11.17	7	5.03	3.71	0.51
		2022-08-07		54.29	68.19	16.76	8.47	5.64	0.45	0.49
		2022-08-12		67.14	15.84	9.63	5.46	1.23	0.21	0.49
		2022-08-17		38.28	41.47	12.26	5.55	1.74	0.21	0.49
		2022-08-22		42.46	9.57	30.68	28.28	21.84	7.15	2.26
		2022-08-27		52.96	32.41	10.88	2.85	0.41	4.21	1.76
		2022-09-11			61.52	13.33	7.46	13.54	3.14	1.02
		2022-09-16			45.64	24.8	8.99	9.73	9.44	1.4
		2022-09-21			51.18	19.68	8.48	8.59	10.88	0.69
		2022-09-26			44.07	24.4	9.66	5.46	11.65	4.77
		2022-10-01			27.3	35.41	10.41	7.45	7.76	11.36
		2022-10-11			0.4	46.72	21.08	9.3	8.08	13.93
		2022-10-21			5.19	41.95	19.96	10.62	8.3	13.29
