# Supplementary material for: Early detection of Cercospora beticola and powdery mildew diseases in sugar beet using uncrewed aerial vehicle-based remote sensing and machine learning
Source: PeerJ. 2025 Jun 3;13:e19530. doi: 10.7717/peerj.19530 (PMC12143290; doi:10.7717/peerj.19530)
Supplement: Supplemental Information 4 [file peerj-13-19530-s004.xlsx]

## Sheet: Plan
	Repetation	Subjects
	1	1	2	3
	2	2	3	1
	3	2	1	3
	4	1	3	2
	5	3	2	1
	6	3	1	2
	1. Control (No pesticide),
	2. Metos software
	3. UAV_MS

## Sheet: 16 June 2022 
	#	#	Subjects
	Repetition 1	Sample	3	2	1
		1	0.74	0.75	0.75
		2	0.77	0.7	0.72
		3	0.73	0.76	0.76
		4	0.73	0.73	0.78
		5	0.75	0.77	0.75
	Repetition 2	Sample	1	3	2
		1	0.73	0.79	0.78
		2	0.77	0.75	0.75
		3	0.76	0.76	0.75
		4	0.76	0.75	0.74
		5	0.76	0.78	0.77
	Repetition 3	Sample	3	1	2
		1	0.7	0.78	0.75
		2	0.78	0.77	0.69
		3	0.77	0.76	0.75
		4	0.79	0.76	0.78
		5	0.7	0.78	0.77
	Repetition 4	Sample	2	3	1
		1	0.75	0.78	0.77
		2	0.77	0.77	0.72
		3	0.73	0.76	0.67
		4	0.76	0.77	0.75
		5	0.76	0.75	0.74
	Repetition 5	Sample	1	2	3
		1	0.78	0.8	0.71
		2	0.76	0.77	0.73
		3	0.77	0.8	0.78
		4	0.78	0.79	0.76
		5	0.79	0.79	0.78
	Repetition 6	Sample	3	1	2
		1	0.77	0.77	0.79
		2	0.75	0.76	0.8
		3	0.76	0.79	0.82
		4	0.76	0.79	0.75
		5	0.76	0.77	0.79
	Mean	Sample	1	2	3
		1	0.752	0.742	0.744
		2	0.756	0.758	0.766
		3	0.77	0.748	0.748
		4	0.73	0.754	0.766
		5	0.776	0.79	0.752
		6	0.776	0.79	0.76
		Gen. Mean	0.76	0.763667	0.756

## Sheet: 23 June 2022
	#	#	Subjects
	Repetition 1	Sample	3	2	1
		1	0.76	0.78	0.77
		2	0.77	0.77	0.73
		3	0.78	0.78	0.77
		4	0.74	0.78	0.78
		5	0.75	0.76	0.78
	Repetition 2	Sample	1	3	2
		1	0.75	0.79	0.74
		2	0.79	0.8	0.77
		3	0.79	0.8	0.77
		4	0.77	0.79	0.8
		5	0.79	0.78	0.79
	Repetition 3	Sample	3	1	2
		1	0.79	0.78	0.78
		2	0.77	0.79	0.78
		3	0.81	0.78	0.76
		4	0.75	0.8	0.78
		5	0.75	0.75	0.77
	Repetition 4	Sample	2	3	1
		1	0.79	0.77	0.63
		2	0.77	0.78	0.79
		3	0.74	0.67	0.68
		4	0.79	0.76	0.68
		5	0.78	0.78	0.79
	Repetition 5	Sample	1	2	3
		1	0.8	0.79	0.75
		2	0.79	0.78	0.75
		3	0.78	0.8	0.79
		4	0.8	0.82	0.77
		5	0.8	0.79	0.78
	Repetition 6	Sample	3	1	2
		1	0.77	0.76	0.77
		2	0.77	0.77	0.75
		3	0.77	0.79	0.81
		4	0.73	0.77	0.77
		5	0.78	0.81	0.79
	Mean	Sample	1	2	3
		1	0.766	0.774	0.76
		2	0.778	0.774	0.792
		3	0.78	0.774	0.774
		4	0.714	0.774	0.752
		5	0.794	0.796	0.768
		6	0.78	0.778	0.764
		Gen. Mean	0.768667	0.778333	0.768333

## Sheet: 3 July 2022
	#	#	Subjects
	Repetition 1	Sample	3	2	1
		1	0.72	0.81	0.82
		2	0.78	0.76	0.8
		3	0.78	0.73	0.8
		4	0.8	0.83	0.83
		5	0.81	0.82	0.84
	Repetition 2	Sample	1	3	2
		1	0.84	0.85	0.8
		2	0.83	0.79	0.83
		3	0.85	0.85	0.81
		4	0.86	0.8	0.8
		5	0.83	0.85	0.8
	Repetition 3	Sample	3	1	2
		1	0.85	0.85	0.81
		2	0.83	0.86	0.81
		3	0.83	0.85	0.85
		4	0.85	0.84	0.71
		5	0.82	0.85	0.84
	Repetition 4	Sample	2	3	1
		1	0.81	0.85	0.77
		2	0.85	0.85	0.73
		3	0.85	0.82	0.67
		4	0.85	0.84	0.73
		5	0.8	0.84	0.83
	Repetition 5	Sample	1	2	3
		1	0.84	0.81	0.8
		2	0.84	0.83	0.77
		3	0.85	0.84	0.86
		4	0.85	0.81	0.85
		5	0.84	0.82	0.84
	Repetition 6	Sample	3	1	2
		1	0.78	0.79	0.85
		2	0.83	0.82	0.82
		3	0.82	0.82	0.83
		4	0.75	0.82	0.84
		5	0.81	0.85	0.83
	Mean	Sample	1	2	3
		1	0.818	0.79	0.778
		2	0.842	0.808	0.828
		3	0.85	0.804	0.836
		4	0.746	0.832	0.84
		5	0.844	0.822	0.824
		6	0.82	0.834	0.798
		Gen. Mean	0.82	0.815	0.817333

## Sheet: 15 July 2022
	#	#	Subjects
	Repetition 1	Sample	3	2	1
		1	0.78	0.8	0.79
		2	0.77	0.8	0.81
		3	0.78	0.81	0.79
		4	0.8	0.78	0.8
		5	0.8	0.8	0.8
	Repetition 2	Sample	1	3	2
		1	0.79	0.8	0.82
		2	0.81	0.83	0.82
		3	0.79	0.79	0.83
		4	0.8	0.8	0.81
		5	0.77	0.81	0.81
	Repetition 3	Sample	3	1	2
		1	0.79	0.81	0.8
		2	0.8	0.8	0.8
		3	0.78	0.78	0.77
		4	0.81	0.82	0.81
		5	0.78	0.81	0.82
	Repetition 4	Sample	2	3	1
		1	0.83	0.81	0.81
		2	0.79	0.79	0.84
		3	0.84	0.79	0.82
		4	0.82	0.79	0.83
		5	0.83	0.79	0.8
	Repetition 5	Sample	1	2	3
		1	0.76	0.83	0.82
		2	0.82	0.81	0.82
		3	0.8	0.78	0.79
		4	0.77	0.79	0.8
		5	0.77	0.82	0.79
	Repetition 6	Sample	3	1	2
		1	0.81	0.77	0.8
		2	0.78	0.78	0.77
		3	0.78	0.79	0.82
		4	0.8	0.78	0.82
		5	0.82	0.79	0.8
	Mean	Sample	1	2	3
		1	0.798	0.798	0.786
		2	0.792	0.818	0.806
		3	0.804	0.8	0.792
		4	0.82	0.822	0.794
		5	0.784	0.806	0.804
		6	0.782	0.802	0.798
		Gen. Ort.	0.796667	0.807667	0.796667

## Sheet: 20 July 2022
	#	#	Subjects
	Repetition 1	Sample	3	2	1
		1	0.78	0.79	0.78
		2	0.77	0.78	0.78
		3	0.73	0.8	0.75
		4	0.76	0.8	0.77
		5	0.77	0.79	0.79
	Repetition 2	Sample	1	3	2
		1	0.73	0.8	0.73
		2	0.76	0.78	0.73
		3	0.71	0.75	0.69
		4	0.76	0.8	0.69
		5	0.77	0.8	0.77
	Repetition 3	Sample	3	1	2
		1	0.75	0.82	0.77
		2	0.76	0.76	0.81
		3	0.7	0.8	0.8
		4	0.72	0.79	0.79
		5	0.66	0.81	0.8
	Repetition 4	Sample	2	3	1
		1	0.73	0.81	0.78
		2	0.68	0.74	0.79
		3	0.71	0.79	0.79
		4	0.72	0.76	0.77
		5	0.79	0.76	0.72
	Repetition 5	Sample	1	2	3
		1	0.77	0.77	0.79
		2	0.73	0.82	0.79
		3	0.72	0.8	0.74
		4	0.73	0.77	0.77
		5	0.74	0.65	0.77
	Repetition 6	Sample	3	1	2
		1	0.71	0.79	0.78
		2	0.75	0.77	0.81
		3	0.77	0.78	0.77
		4	0.76	0.79	0.78
		5	0.77	0.74	0.79
	Mean	Sample	1	2	3
		1	0.774	0.792	0.762
		2	0.746	0.722	0.786
		3	0.796	0.794	0.718
		4	0.77	0.726	0.772
		5	0.738	0.762	0.772
		6	0.774	0.786	0.752
		Gen. Ort.	0.766333	0.763667	0.760333

## Sheet: 30 July 2022
	#	#	Subjects
	Repetition 1	Sample	3	2	1
		1	0.65	0.77	0.72
		2	0.67	0.76	0.71
		3	0.66	0.78	0.67
		4	0.69	0.76	0.71
		5	0.75	0.78	0.7
	Repetition 2	Sample	1	3	2
		1	0.73	0.76	0.71
		2	0.7	0.77	0.67
		3	0.76	0.73	0.59
		4	0.75	0.72	0.69
		5	0.73	0.75	0.72
	Repetition 3	Sample	3	1	2
		1	0.75	0.73	0.65
		2	0.78	0.72	0.6
		3	0.76	0.74	0.69
		4	0.76	0.72	0.72
		5	0.76	0.73	0.72
	Repetition 4	Sample	2	3	1
		1	0.74	0.72	0.74
		2	0.71	0.73	0.67
		3	0.72	0.68	0.73
		4	0.69	0.74	0.66
		5	0.68	0.72	0.67
	Repetition 5	Sample	1	2	3
		1	0.72	0.76	0.72
		2	0.74	0.76	0.74
		3	0.71	0.75	0.77
		4	0.74	0.71	0.76
		5	0.7	0.74	0.75
	Repetition 6	Sample	2	1	3
		1	0.73	0.72	0.66
		2	0.7	0.7	0.68
		3	0.68	0.75	0.66
		4	0.69	0.74	0.72
		5	0.72	0.73	0.73
	Mean	Sample	0.92	0.773333	1.075
		1
		2
		3
		4
		5
		6

## Sheet: 6 August 2022
	#	#	Subjects
	Repetition 1	Sample	3	2	1
		1	76	77	74
		2	68	78	66
		3	72	77	67
		4	75	74	66
		5	73	78	70
	Repetition 2	Sample	1	3	2
		1	69	71	68
		2	61	71	69
		3	66	76	72
		4	63	72	73
		5	70	75	72
	Repetition 3	Sample	3	1	2
		1	68	73	76
		2	72	73	75
		3	72	73	70
		4	74	75	73
		5	77	78	73
	Repetition 4	Sample	2	3	1
		1	77	73	71
		2	78	71	74
		3	62	67	68
		4	74	70	70
		5	76	73	71
	Repetition 5	Sample	1	2	3
		1	79	73	70
		2	77	78	69
		3	73	73	74
		4	77	74	73
		5	70	74	74
	Repetition 6	Sample	2	1	3
		1	74	74	72
		2	72	74	72
		3	71	72	72
		4	76	73	67
		5	77	73	64
	Mean	Sample	62	61.1667	58.3333
		1
		2
		3
		4
		5
		6

## Sheet: Combined
	Date	S1	S2	S3
	2022-06-16	0.76	0.763667	0.756
	2022-06-23	0.768667	0.778333	0.768333
	2022-07-03	0.82	0.815	0.817333
	2022-07-15	0.796667	0.807667	0.796667
	2022-07-20	0.766333	0.763667	0.760333
	2022-07-30	0.786333	0.791167	0.784583
	2022-08-06	0.782333	0.785667	0.779733
