# Supplementary material for: Early detection of Cercospora beticola and powdery mildew diseases in sugar beet using uncrewed aerial vehicle-based remote sensing and machine learning
Source: PeerJ. 2025 Jun 3;13:e19530. doi: 10.7717/peerj.19530 (PMC12143290; doi:10.7717/peerj.19530)
Supplement: Supplemental Information 5 [file peerj-13-19530-s005.xlsx]

## Sheet: ag-grid
Tarih	Mean Air Temperature [°C]	Mean Relative Humidity [%]	Daily Total Precipitation [mm]	Leaf Wetness [Hour]
2023-08-20	24.3333	72.4667	0	25.8571
2023-08-19	25.721	72.4567	0	26.5714
2023-08-18	27.3876	74.051	0	27.7619
2023-08-17	26.0171	83.211	25	35.381
2023-08-16	25.691	86.9038	0	28.7143
2023-08-15	24.8043	90.0152	0	31.8095
2023-08-14	26.1429	83.8043	0	20
2023-08-13	23.181	80.5614	0	19.6667
2023-08-12	21.0771	83.1424	0	24.4286
2023-08-11	21.6348	90.5414	0.2	32.2857
2023-08-10	22.4681	87.1976	8.4	4.04762
2023-08-09	22.1052	84.2476	0	0
2023-08-08	23.1386	82.3524	0	12.0476
2023-08-07	24.6852	70.4471	0	6.33333
2023-08-06	26.9667	71.1776	0	13.2381
2023-08-05	26.1576	68.3738	0	6.33333
2023-08-04	26.091	64.8633	0	7.04762
2023-08-03	24.7538	67.98	0	11.0952
2023-08-02	23.3976	76.4433	11.6	35.381
2023-08-01	21.7795	80.1038	0	2.04762
2023-07-31	20.0457	82.8843	41.4	0
2023-07-30	20.6338	73.1514	0	0
2023-07-29	20.5129	72.34	0	0
2023-07-28	20.5129	71.5224	0	0
2023-07-27	24.45	79.9867	0	0
2023-07-26	25.8205	64.0871	0	0
2023-07-25	22.6876	67.7543	0	0
2023-07-24	24.3248	75.3086	0	4.52381
2023-07-23	25.7871	69.7748	0	1.90476
2023-07-22	25.909	69.7757	0	4.19048
2023-07-21	25.2352	72.7281	0	5.38095
2023-07-20	24.1333	71.0205	0.8	38.7143
2023-07-19	21.689	69.8619	0	0
2023-07-18	22.1786	76.7652	0	0
2023-07-17	21.8667	73.1795	0	0
2023-07-16	22.4086	72.5771	0	0
2023-07-15	25.7695	71.4414	0	1.66667
2023-07-14	25.9843	70.5467	0	1.66667
2023-07-13	25.0029	73.1281	0	3.71429
2023-07-12	23.3638	74.319	0	2.52381
2023-07-11	21.8352	73.6186	0	2.38095
2023-07-10	19.3352	78.16	0	18.7143
2023-07-09	19.0357	90.4243	4.8	55.619
2023-07-08	20.4333	98.1086	68.6	50.1429
2023-07-07	25.0333	77.3033	0	20.1429
2023-07-06	25.1595	88.5371	7.4	37.0476
2023-07-05	24.6062	80.0129	0	10.4762
2023-07-04	24.2581	66.8662	0	8.57143
2023-07-03	24.1105	67.0895	0	9.52381
2023-07-02	22.7614	66.3886	0	11.4286
2023-07-01	20.4219	67.2457	1.6	7.38095
2023-06-30	21.29	67.5005	0	0
2023-06-29	19.679	83.8095	0	0
2023-06-28	22.4657	70.3767	0	0
2023-06-27	22.2152	79.5429	0	0
2023-06-26	22.7095	78.5005	0	0
2023-06-25	23.0686	75.7467	0	0
2023-06-24	23.4957	68.93	0	0
2023-06-23	22.1819	74.9243	0	2.14286
2023-06-22	20.7405	76.5605	0	4.04762
2023-06-21	20.7695	83.7038	0	21.4286
2023-06-20	20.1086	88.6576	0	35.1429
2023-06-19	20.611	94.3467	9	55.381
2023-06-18	18.8338	99.879	0.4	59.9048
2023-06-17	21.699	87.8467	32.2	38.9524
2023-06-16	23.0729	75.7414	0	17.1429
2023-06-15	20.8862	76.869	0	26.3333
2023-06-14	18.2486	85.3343	0	23.0952
2023-06-13	19.5776	83.4538	0	0
2023-06-12	17.9667	84.1762	0	21.0952
2023-06-11	20.3986	67.3148	0	18.0952
2023-06-10	21.4392	66.3877	4	13.4615

## Sheet: CLS_Combined
Date/Time	Average air temperature [°C]	Average relative humidity [%]	Total precipitation [mm]	Leaf wetness [saat]	NDVI2	GS-S1	GS-S2	GS-S3	MS1	MS2	MS3
2023-06-10	21.4392	66.3877	4	13.4615	11.09	75	75	75	4.47	4.27667	4.78667
2023-06-11	20.3986	67.3148	0	18.0952
2023-06-12	17.9667	84.1762	0	21.0952
2023-06-13	19.5776	83.4538	0	0
2023-06-14	18.2486	85.3343	0	23.0952
2023-06-15	20.8862	76.869	0	26.3333
2023-06-16	23.0729	75.7414	0	17.1429
2023-06-17	21.699	87.8467	32.2	38.9524		79	79	79	4.47	4.27667	4.78667
2023-06-18	18.8338	99.879	0.4	59.9048
2023-06-19	20.611	94.3467	9	55.381
2023-06-20	20.1086	88.6576	0	35.1429
2023-06-21	20.7695	83.7038	0	21.4286
2023-06-22	20.7405	76.5605	0	4.04762
2023-06-23	22.1819	74.9243	0	2.14286	12.56	81	80	80	9.52167	7.26333	9.23833
2023-06-24	23.4957	68.93	0	0
2023-06-25	23.0686	75.7467	0	0
2023-06-26	22.7095	78.5005	0	0
2023-06-27	22.2152	79.5429	0	0
2023-06-28	22.4657	70.3767	0	0	17.7
2023-06-29	19.679	83.8095	0	0
2023-06-30	21.29	67.5005	0	0
2023-07-01	20.4219	67.2457	1.6	7.38095		80	80	80	14.6783	13.9883	14.145
2023-07-02	22.7614	66.3886	0	11.4286
2023-07-03	24.1105	67.0895	0	9.52381	36.12
2023-07-04	24.2581	66.8662	0	8.57143
2023-07-05	24.6062	80.0129	0	10.4762
2023-07-06	25.1595	88.5371	7.4	37.0476
2023-07-07	25.0333	77.3033	0	20.1429		79	79	78	14.1233	12.68	15.74
2023-07-08	20.4333	98.1086	68.6	50.1429
2023-07-09	19.0357	90.4243	4.8	55.619
2023-07-10	19.3352	78.16	0	18.7143
2023-07-11	21.8352	73.6186	0	2.38095
2023-07-12	23.3638	74.319	0	2.52381
2023-07-13	25.0029	73.1281	0	3.71429	28.79
2023-07-14	25.9843	70.5467	0	1.66667
2023-07-15	25.7695	71.4414	0	1.66667		70	73	72	23.115	24.34	21.4633
2023-07-16	22.4086	72.5771	0	0
2023-07-17	21.8667	73.1795	0	0
2023-07-18	22.1786	76.7652	0	0	25.88
2023-07-19	21.689	69.8619	0	0
2023-07-20	24.1333	71.0205	0.8	38.7143
2023-07-21	25.2352	72.7281	0	5.38095
2023-07-22	25.909	69.7757	0	4.19048		68	73	71	11.765	16.4483	16.57
2023-07-23	25.7871	69.7748	0	1.90476	37.59
2023-07-24	24.3248	75.3086	0	4.52381
2023-07-25	22.6876	67.7543	0	0
2023-07-26	25.8205	64.0871	0	0
2023-07-27	24.45	79.9867	0	0
2023-07-28	20.5129	71.5224	0	0	36.13	60	68	68	12.1583	24.3833	24.9033
2023-07-29	20.5129	72.34	0	0
2023-07-30	20.6338	73.1514	0	0
2023-07-31	20.0457	82.8843	41.4	0
2023-08-01	21.7795	80.1038	0	2.04762
2023-08-02	23.3976	76.4433	11.6	35.381	47.03
2023-08-03	24.7538	67.98	0	11.0952
2023-08-04	26.091	64.8633	0	7.04762
2023-08-05	26.1576	68.3738	0	6.33333		57	67	66	15.255	21.6117	21.23
2023-08-06	26.9667	71.1776	0	13.2381
2023-08-07	24.6852	70.4471	0	6.33333	33.96
2023-08-08	23.1386	82.3524	0	12.0476
2023-08-09	22.1052	84.2476	0	0
2023-08-10	22.4681	87.1976	8.4	4.04762		56	66	64	14.16	15.7667	17.735
2023-08-11	21.6348	90.5414	0.2	32.2857
2023-08-12	21.0771	83.1424	0	24.4286
2023-08-13	23.181	80.5614	0	19.6667
2023-08-14	26.1429	83.8043	0	20
2023-08-15	24.8043	90.0152	0	31.8095
2023-08-16	25.691	86.9038	0	28.7143
2023-08-17	26.0171	83.211	25	35.381	16.26	54	64	60	14.0167	15.2	15.3817
2023-08-18	27.3876	74.051	0	27.7619
2023-08-19	25.721	72.4567	0	26.5714
2023-08-20	24.3333	72.4667	0	25.8571
			215.4	1001.99
		2023-07-20	128.8	621.319
