# Supplementary material for: Early detection of Cercospora beticola and powdery mildew diseases in sugar beet using uncrewed aerial vehicle-based remote sensing and machine learning
Source: PeerJ. 2025 Jun 3;13:e19530. doi: 10.7717/peerj.19530 (PMC12143290; doi:10.7717/peerj.19530)
Supplement: Supplemental Information 6 [file peerj-13-19530-s006.xlsx]

## Sheet: MS_CLS
	2022-06-17				2023-06-23				2023-07-01				2023-07-07				2023-07-15				2023-07-22				2023-07-28				2023-08-05				2023-08-10				2023-08-17
		Min	Max			Min	Max			Min	Max			Min	Max			Min	Max			Min	Max			Min	Max			Min	Max			Min	Max			Min	Max
Green		0.9	0.97			0.92	0.98			0.9	0.97			0.91	0.97			0.91	0.98			0.86	0.97			0.85	0.99			0.84	0.97			0.81	0.95			0.79	0.97
Yellow		0.85	0.9			0.86	0.92			0.84	0.9			0.86	0.91			0.84	0.91			0.78	0.86			0.77	0.85			0.73	0.84			0.7	0.81			0.64	0.79
Orange1		0.8	0.85			0.8	0.86			0.78	0.84			0.81	0.86			0.78	0.84			0.7	0.78			0.66	0.77			0.58	0.73			0.57	0.7			0.48	0.64
Orange2		0.75	0.8			0.74	0.8			0.72	0.78			0.75	0.81			0.71	0.78			0.6	0.7			0.52	0.66			0.41	0.58			0.44	0.57			0.31	0.48
Red		0.69	0.75			0.68	0.74			0.66	0.72			0.7	0.75			0.65	0.71			0.48	0.6			0.32	0.52			0.14	0.41			0.29	0.44			0.1	0.31
	T1P1	T1P2	T1P3	S2, 1.Spray (22.06.2023)	T1P1	T1P2	T1P3		T1P1	T1P2	T1P3	S2, 2. Spray (07.07.2023)	T1P1	T1P2	T1P3	S3, 1. Spray (09.07.2023)	T1P1	T1P2	T1P3	S2, 3. Spray (21.07.2023)	T1P1	T1P2	T1P3	S3, 2. Spray (24.07.2023)	T1P1	T1P2	T1P3		T1P1	T1P2	T1P3	S2, 4. Spray (07.08.2023)	T1P1	T1P2	T1P3	S3, 3. Spray (10.08.2023)	T1P1	T1P2	T1P3
Green	4.48	4.49	3.04		12.51	10.23	8.38		14.27	14.54	18.08		10.87	17.81	18.22		30.75	21.83	21.52		6.02	22.44	17.28		4.3	29.53	29.52		8.03	24.27	25.78		10	15.38	20.03		8.26	8.12	10.36
Yellow	37.86	37.79	33.11		32.42	32.15	35.23		37	37.87	35.16		39.19	38.64	32.62		39.96	47.13	50.63		30.05	53.34	60.3		25.22	42.8	40.74		36.37	51.11	42.12		32.74	50.4	51.68		33.6	33.99	41.17
Orange1	46.21	46.16	47.5		36.2	38.02	43.03		35.35	35.73	33.81		37.61	31.62	31.51		21.97	25.8	23.86		35.7	17.76	18.36		34.76	18.91	22.84		33.99	18.82	23.83		30.87	25.74	20.9		33.77	32.73	32.47
Orange2	9.96	9.92	11.62		14	17.33	11.51		10.76	10.51	10.91		10.86	10.3	11.59		6.14	4.6	3.5		18.45	4.87	3.06		25	6.81	5.88		16.54	4.71	7.04		18.51	7.06	5.82		16.77	16.41	12.29
Red	1.49	1.64	4.73		4.88	2.28	1.85		2.62	1.36	2.04		1.47	1.63	2.06		1.18	0.64	0.49		9.78	1.6	0.99		10.72	1.94	1.02		5.07	1.08	1.23		7.87	1.42	1.57		7.6	8.75	3.71
	T2P2	T2P3	T2P1		T2P2	T2P3	T2P1		T2P2	T2P3	T2P1		T2P2	T2P3	T2P1		T2P2	T2P3	T2P1		T2P2	T2P3	T2P1		T2P2	T2P3	T2P1		T2P2	T2P3	T2P1		T2P2	T2P3	T2P1		T2P2	T2P3	T2P1
Green	4.18	5.7	3.14		8.11	8.78	8.46		14.34	15.46	18.03		7.52	17.6	15.28		28.71	17.58	19.8		14.94	10.74	3.6		12.6	15.98	3.36		12.38	8.93	6.06		8.76	10.67	14.61		12.59	9.68	9.34
Yellow	39.66	39.27	31.17		36.38	35.62	35.69		37.97	45.68	34.97		39.71	36.54	35.33		43.08	45.07	47.38		47.42	32.65	21.8		43.25	35.4	19.15		44.18	34.07	28.04		40.39	33.65	40.79		42.79	36.47	42.8
Orange1	45.54	44.22	48.78		38.84	41.59	41.87		35.01	31.4	33.15		40.48	30.51	32.71		22.36	28.68	25.99		30.71	28.01	34.84		35.26	27.2	34.25		30.61	32.71	35.09		33.84	30.77	27.42		30.48	30.2	33
Orange2	9.06	9.64	13.75		13.33	12.37	11.46		10.2	6.35	11.34		10.85	12.28	13.52		5.03	7.23	5.73		6.06	17.47	24.73		7.89	15.28	29.15		10.65	17.85	22.33		13	17.25	12.52		10.8	14.87	11.51
Red	1.56	1.79	3.16		3.33	1.65	2.52		2.48	1.12	2.51		1.44	3.08	3.15		0.81	1.44	1.1		0.87	11.13	15.03		1	6.14	14.09		2.19	6.44	8.48		4	7.66	4.66		3.33	8.76	3.35
	T3P2	T3P1	T3P3		T3P2	T3P1	T3P3		T3P2	T3P1	T3P3		T3P2	T3P1	T3P3		T3P2	T3P1	T3P3		T3P2	T3P1	T3P3		T3P2	T3P1	T3P3		T3P2	T3P1	T3P3		T3P2	T3P1	T3P3		T3P2	T3P1	T3P3
Green	4.49	5.52	3.1		4.1	8.15	6.48		14.13	16.3	17.45		8.05	15.78	15.68		22.75	19.15	18.25		9.06	16.53	6.86		24.77	10.99	20.02		11.96	15.18	8.41		8.2	16.13	16.73		16.18	13.39	16.55
Yellow	40.02	40.36	30.43		30.62	35.12	34.1		34.16	36.86	34.15		30.15	35.15	35.66		26.96	42.5	46.03		44.73	58.72	30.24		52.45	35.22	45.99		43.36	50.56	34.96		37.94	46.34	43.08		42.65	42.22	43.63
Orange1	45.45	42.31	46.36		45.27	41	45.04		34.88	34.23	32.86		39.17	31.45	31.82		25.47	27.31	27.59		36.63	18.55	30.03		18.19	29.83	25.18		30.89	25.47	33.84		33.97	24.42	24.26		27.94	29.36	26.89
Orange2	8.66	10.05	14.76		16.29	14.04	11.89		12.64	10.5	12.2		18.42	13.93	13.52		10.87	8.72	6.86		8.25	4.41	19.11		3.61	17.52	6.95		11.47	6.98	17.4		14.65	9.09	11.05		9.88	10.77	9.59
Red	1.38	1.77	5.33		3.72	1.7	2.5		4.18	2.11	3.34		4.2	3.69	3.33		3.95	2.31	1.27		1.33	1.68	13.77		0.98	6.44	1.86		2.31	1.81	5.39		5.24	4.02	4.89		3.35	4.25	3.34
	T4P1	T4P3	T4P2		T4P1	T4P3	T4P2		T4P1	T4P3	T4P2		T4P1	T4P3	T4P2		T4P1	T4P3	T4P2		T4P1	T4P3	T4P2		T4P1	T4P3	T4P2		T4P1	T4P3	T4P2		T4P1	T4P3	T4P2		T4P1	T4P3	T4P2
Green	4.25	5.09	3.47		13.84	5.14	7.58		11.53	16.14	17.41		12.35	13.95	18.25		27.87	20.39	23.71		7.99	14.42	10.96		9.43	22.34	26.08		7.52	15	42.24		4.18	18.6	34.46		18.48	20.41	22.11
Yellow	39.86	37.98	29.52		35.11	29	35.67		36.81	35.24	31.78		37.76	37.21	36.93		34.1	39.62	46.27		39.14	48.41	52.14		32.88	48.92	43.13		30.64	41.75	43.06		27.24	47.59	42.49		44.56	46.71	43.62
Orange1	44.06	43.05	44.66		33.44	46.71	41.53		37.06	34.2	33.15		34.39	32.54	30.18		22.75	26.97	23.6		36.51	27.48	30.47		32.19	21.82	24.63		32.34	28.34	11.6		36.08	22.6	18.17		24.34	23.7	24.26
Orange2	9.85	11.02	16.18		13.54	17.1	11.25		11.56	11.5	13.52		12.69	13.17	11.84		11.02	10.1	5.39		12.39	7.12	5.45		17.89	5.63	5.55		20.8	11.28	2.45		22.34	7.84	4.14		8.22	7.11	7.8
Red	1.98	2.87	6.17		4.07	2.05	3.98		3.04	2.93	4.14		2.8	3.12	2.8		4.26	2.92	1.03		3.96	2.56	0.98		7.61	1.29	0.61		8.71	3.63	0.65		10.16	3.37	0.73		4.4	2.07	2.21
	T5P3	T5P2	T5P1		T5P3	T5P2	T5P1		T5P3	T5P2	T5P1		T5P3	T5P2	T5P1		T5P3	T5P2	T5P1		T5P3	T5P2	T5P1		T5P3	T5P2	T5P1		T5P3	T5P2	T5P1		T5P3	T5P2	T5P1		T5P3	T5P2	T5P1
Green	6.6	4.61	3.26		13.76	7.45	6.67		9.64	14.79	15.1		10.64	13.81	16.28		28.29	20.65	20.1		26.04	16.08	20.14		28.32	31.3	23.49		30.13	14.29	36.02		10.16	18.72	29.23		20.11	20.95	23.27
Yellow	37.7	33.14	27.48		33.56	35.2	33.24		33.13	35.2	32.21		37.6	36.77	37.93		31.96	38.76	45.53		47.67	48.22	47.28		40.33	47.2	41.03		37.75	41.68	38.11		46.92	51.61	41.54		42.18	45.64	42.65
Orange1	42.67	45.41	46.14		33.36	41.52	45.2		39.66	35.27	34.35		37.28	33.5	31.07		21.85	27.74	25.69		20.84	25.81	26.58		21.12	16.59	27.04		20.64	28.69	19.92		31.18	21.1	21.89		25.05	23.47	24.17
Orange2	10.49	13.72	17.57		14.46	13.42	12.86		13.63	11.48	14.26		12.63	12.94	11.98		12.17	10.05	7.05		4.15	6.48	5.1		7.54	3.89	7.52		9.23	12.42	5.08		9.44	6.14	6.22		9.26	7.57	7.86
Red	2.55	3.12	5.55		4.86	2.42	2.02		3.94	3.26	4.09		1.85	2.97	2.74		5.73	2.81	1.63		1.29	3.41	0.9		2.68	1.04	0.93		2.25	2.92	0.86		2.29	2.42	1.12		3.42	2.37	2.05
	T6P3	T6P1	T6P2		T6P3	T6P1	T6P2		T6P3	T6P1	T6P2		T6P3	T6P1	T6P2		T6P3	T6P1	T6P2		T6P3	T6P1	T6P2		T6P3	T6P1	T6P2		T6P3	T6P1	T6P2		T6P3	T6P1	T6P2		T6P3	T6P1	T6P2
Green	5.19	6.17	4.42		12.89	7.5	6.11		8.1	12.84	8.72		18.35	14.18	10.64		22.75	21.02	28.39		24.08	16.31	25.21		33.24	21.38	22.02		39.13	18.72	24.53		30.22	10.83	9.08		15.18	11.36	11.25
Yellow	28.77	29.5	29.52		29.85	33.25	35.1		27.5	35.05	34.15		37.15	34.7	36.27		47.94	40	31.25		52.01	42.23	48.39		44.04	41.93	49.56		37.38	42.02	36.15		51.98	43.84	47.7		46.51	38.47	38.96
	42.86	40.07	41.29		32.98	38.72	44.84		37.98	36.58	39.32		29.79	33.08	36.75		23.22	26.57	21.92		19.75	24.63	20.69		19.13	23.29	21.36		18.59	22.22	24.31		14.49	29.61	32.94		27.98	35.34	31.03
Orange2	16.91	17.22	17.11		16.93	16	12.15		18.91	12.29	13.94		11.94	14.44	13.76		5.1	9.71	12.46		3.33	9.46	4.03		3.19	9.54	5.43		4.29	11.99	12.1		2.59	10.94	8.84		8.38	12.7	12.91
Red	6.27	7.03	7.66		7.36	4.53	1.81		7.52	3.24	3.86		2.77	3.6	2.58		0.98	2.7	5.98		0.82	7.37	1.67		0.41	3.86	1.63		0.61	5.06	2.91		0.73	4.78	1.74		1.95	2.14	6.12
	2022-06-17				2023-06-23				2023-07-01				2023-07-07				2023-07-15				2023-07-22				2023-07-28
	1	2	3		1	2	3		1	2	3		1	2	3		1	2	3		1	2	3		1	2	3		1	2	3		1	2	3		1	2	3
Green	4.47	4.27667	4.78667		9.52167	7.26333	9.23833		14.6783	13.9883	14.145		14.1233	12.68	15.74		23.115	24.34	21.4633		11.765	16.4483	16.57		12.1583	24.3833	24.9033		15.255	21.6117	21.23		14.1633	15.7667	17.735		14.0167	15.2	15.3817
Yellow	34.3717	34.9417	34.5433		34.1383	34.1867	32.8933		35.4833	35.1883	35.1433		36.6767	36.4117	36.13		41.5783	38.9083	43.5417		39.87	49.04	45.2133		32.5717	46.3983	42.57		37.6233	43.2567	38.005		38.7483	45.0883	45.8167		40.7167	41.275	42.7783
Orange1	44.595	44.7517	44.4433		39.405	41.67	40.4517		35.12	35.56	34.985		33.385	35.2833	32.2417		25.0467	24.4817	25.3617		29.4683	27.0117	24.0783		30.2267	22.49	22.8817		28.1717	24.1533	26.325		28.3817	27.6267	24.0333		29.9967	28.3183	27.715
Orange2	13.0667	12.4417	12.4067		13.65	13.9617	14.0433		11.785	12.0483	12.25		12.9033	13.0183	12.5217		8.06167	8.06667	7.49333		12.4233	5.85667	9.04		17.77	5.53	7.41167		13.9533	8.96667	11.1817		13.27	8.97167	8.99833		11.305	10.895	10.25
Red	3.49667	3.58833	3.92333		3.28667	2.92333	3.37833		2.935	3.21333	3.48167		2.90833	2.60333	2.70167		2.19667	2.53667	2.13833		6.45333	1.64333	5.09333		7.275	1.2	2.23333		4.99833	2.01	3.25833		5.435	2.59167	3.41833		3.965	4.355	3.875

## Sheet: MS_Chart
		1	2	3				2023-06-17	2023-06-23	2023-07-01	2023-07-07	2023-07-15	2023-07-22	2023-07-28	2023-08-05	2023-08-10	2023-08-17
2023-06-17	Green	4.47	4.27667	4.78667		Green	1	4.47	9.52167	14.6783	14.1233	23.115	11.765	12.1583	15.255	14.16	14.0167
	Yellow	34.3717	34.9417	34.5433			2	4.27667	7.26333	13.9883	12.68	24.34	16.4483	24.3833	21.6117	15.7667	15.2
	Orange1	44.595	44.7517	44.4433			3	4.78667	9.23833	14.145	15.74	21.4633	16.57	24.9033	21.23	17.735	15.3817
	Orange2	13.0667	12.4417	12.4067
	Red	3.49667	3.58833	3.92333
2023-06-23	Green	9.52167	7.26333	9.23833
	Yellow	34.1383	34.1867	32.8933
	Orange1	39.405	41.67	40.4517
	Orange2	13.65	13.9617	14.0433
	Red	3.28667	2.92333	3.37833
2023-07-01	Green	14.6783	13.9883	14.145
	Yellow	35.4833	35.1883	35.1433
	Orange1	35.12	35.56	34.985
	Orange2	11.785	12.0483	12.25
	Red	2.935	3.21333	3.48167
2023-07-07	Green	14.1233	12.68	15.74
	Yellow	36.6767	36.4117	36.13
	Orange1	33.385	35.2833	32.2417
	Orange2	12.9033	13.0183	12.5217
	Red	2.90833	2.60333	2.70167
2023-07-15	Green	23.115	24.34	21.4633
	Yellow	41.5783	38.9083	43.5417
	Orange1	25.0467	24.4817	25.3617
	Orange2	8.06167	8.06667	7.49333
	Red	2.19667	2.53667	2.13833
2023-07-22	Green	11.765	16.4483	16.57
	Yellow	39.87	49.04	45.2133				2023-06-17	2023-06-23	2023-07-01	2023-07-07	2023-07-15	2023-07-22	2023-07-28	2023-08-05	2023-08-10	2023-08-17
	Orange1	29.4683	27.0117	24.0783		Yellow	1	34.3717	34.1383	35.4833	36.6767	41.5783	39.87	32.5717	37.6233	38.7483	40.7167
	Orange2	12.4233	5.85667	9.04			2	34.9417	34.1867	35.1883	36.4117	38.9083	49.04	46.3983	43.2567	45.0883	41.275
	Red	6.45333	1.64333	5.09333			3	34.5433	32.8933	35.1433	36.13	43.5417	45.2133	42.57	38.005	45.8167	42.7783
2023-07-28	Green	12.1583	24.3833	24.9033
	Yellow	32.5717	46.3983	42.57
	Orange1	30.2267	22.49	22.8817
	Orange2	17.77	5.53	7.41167
	Red	7.275	1.2	2.23333
2023-08-05	Green	15.255	21.6117	21.23
	Yellow	37.6233	43.2567	38.005
	Orange1	28.1717	24.1533	26.325
	Orange2	13.9533	8.96667	11.1817
	Red	4.99833	2.01	3.25833
2023-08-10	Green	14.16	15.7667	17.735
	Yellow	38.7483	45.0883	45.8167
	Orange1	28.3817	27.6267	24.0333
	Orange2	13.27	8.97167	8.99833
	Red	5.435	2.59167	3.41833
2023-08-17	Green	14.0167	15.2	15.3817
	Yellow	40.7167	41.275	42.7783
	Orange1	29.9967	28.3183	27.715
	Orange2	11.305	10.895	10.25				2023-06-17	2023-06-23	2023-07-01	2023-07-07	2023-07-15	2023-07-22	2023-07-28	2023-08-05	2023-08-10	2023-08-17
	Red	3.965	4.355	3.875		Orange1	1	44.595	39.405	35.12	33.385	25.0467	29.4683	30.2267	28.1717	28.3817	29.9967
2023-08-25	Green						2	44.7517	41.67	35.56	35.2833	24.4817	27.0117	22.49	24.1533	27.6267	28.3183
	Yellow						3	44.4433	40.4517	34.985	32.2417	25.3617	24.0783	22.8817	26.325	24.0333	27.715
	Orange1
	Orange2
	Red
2023-09-02	Green
	Yellow
	Orange1
	Orange2
	Red
								2023-06-17	2023-06-23	2023-07-01	2023-07-07	2023-07-15	2023-07-22	2023-07-28	2023-08-05	2023-08-10	2023-08-17
						Orange2	1	13.0667	13.65	11.785	12.9033	8.06167	12.4233	17.77	13.9533	13.27	11.305
							2	12.4417	13.9617	12.0483	13.0183	8.06667	5.85667	5.53	8.96667	8.97167	10.895
							3	12.4067	14.0433	12.25	12.5217	7.49333	9.04	7.41167	11.1817	8.99833	10.25
								2023-06-17	2023-06-23	2023-07-01	2023-07-07	2023-07-15	2023-07-22	2023-07-28	2023-08-05	2023-08-10	2023-08-17
						Red	1	3.49667	3.28667	2.935	2.90833	2.19667	6.45333	7.275	4.99833	5.435	3.965
							2	3.58833	2.92333	3.21333	2.60333	2.53667	1.64333	1.2	2.01	2.59167	4.355
							3	3.92333	3.37833	3.48167	2.70167	2.13833	5.09333	2.23333	3.25833	3.41833	3.875
