# Supplementary material for: Early detection of Cercospora beticola and powdery mildew diseases in sugar beet using uncrewed aerial vehicle-based remote sensing and machine learning
Source: PeerJ. 2025 Jun 3;13:e19530. doi: 10.7717/peerj.19530 (PMC12143290; doi:10.7717/peerj.19530)
Supplement: Supplemental Information 7 [file peerj-13-19530-s007.xlsx]

## Sheet: Plan
	Repetation	Subjects
	1	1	2	3
	2	2	3	1
	3	2	1	3
	4	1	3	2
	5	3	2	1
	6	3	1	2
	1. Control (No pesticide),
	2. Metos software
	3. UAV_MS

## Sheet: 10 June 2023
	#	#	Subjects
	Repetition 1	Sample	1	2	3
		1	0.73	0.75	0.75
		2	0.72	0.76	0.73
		3	0.74	0.74	0.75
		4	0.74	0.73	0.76
		5	0.76	0.71	0.75
	Repetition 2	Sample	2	3	1
		1	0.75	0.76	0.75
		2	0.75	0.75	0.76
		3	0.77	0.77	0.75
		4	0.76	0.76	0.75
		5	0.76	0.74	0.75
	Repetition 3	Sample	2	1	3
		1	0.74	0.77	0.77
		2	0.72	0.77	0.75
		3	0.74	0.76	0.77
		4	0.77	0.76	0.76
		5	0.75	0.76	0.74
	Repetition 4	Sample	1	3	2
		1	0.73	0.76	0.76
		2	0.74	0.77	0.76
		3	0.73	0.77	0.77
		4	0.73	0.77	0.75
		5	0.72	0.76	0.77
	Repetition 5	Sample	3	2	1
		1	0.75	0.75	0.75
		2	0.75	0.74	0.76
		3	0.74	0.73	0.75
		4	0.72	0.72	0.77
		5	0.73	0.75	0.76
	Repetition 6	Sample	3	1	2
		1	0.74	0.76	0.75
		2	0.75	0.76	0.75
		3	0.74	0.78	0.74
		4	0.73	0.76	0.75
		5	0.73	0.76	0.75
	Mean	Sample	1	2	3
		1	0.738	0.738	0.748
		2	0.752	0.758	0.756
		3	0.764	0.744	0.758
		4	0.73	0.762	0.766
		5	0.758	0.738	0.738
		6	0.764	0.748	0.738
		Gen. Mean	0.751	0.748	0.750667

## Sheet: 17 June 2023
	#	#	Subjects
	Repetition 1	Sample	3	2	1
		1	0.78	0.8	0.79
		2	0.79	0.8	0.8
		3	0.79	0.8	0.79
		4	0.79	0.79	0.78
		5	0.78	0.78	0.79
	Repetition 2	Sample	2	3	1
		1	0.78	0.78	0.8
		2	0.78	0.81	0.78
		3	0.79	0.8	0.8
		4	0.78	0.82	0.78
		5	0.77	0.8	0.79
	Repetition 3	Sample	2	1	3
		1	0.8	0.79	0.79
		2	0.78	0.8	0.82
		3	0.78	0.79	0.8
		4	0.79	0.8	0.79
		5	0.79	0.79	0.8
	Repetition 4	Sample	1	3	2
		1	0.79	0.79	0.79
		2	0.8	0.79	0.79
		3	0.79	0.78	0.79
		4	0.8	0.8	0.8
		5	0.8	0.8	0.8
	Repetition 5	Sample	3	2	1
		1	0.8	0.8	0.79
		2	0.79	0.78	0.8
		3	0.78	0.78	0.79
		4	0.79	0.79	0.79
		5	0.79	0.79	0.8
	Repetition 6	Sample	3	1	2
		1	0.79	0.79	0.8
		2	0.78	0.8	0.8
		3	0.8	0.79	0.8
		4	0.8	0.78	0.78
		5	0.79	0.79	0.79
	Mean	Sample	1	2	3
		1	0.786	0.794	0.79
		2	0.79	0.78	0.802
		3	0.794	0.788	0.8
		4	0.796	0.794	0.792
		5	0.794	0.788	0.79
		6	0.79	0.794	0.792
		Gen. Mean	0.791667	0.789667	0.794333

## Sheet: 23 June 2023
	#	#	Subjects
	Repetition 1	Sample	3	2	1
		1	0.79	0.81	0.79
		2	0.8	0.82	0.77
		3	0.79	0.84	0.78
		4	0.83	0.8	0.78
		5	0.83	0.82	0.79
	Repetition 2	Sample	1	3	2
		1	0.78	0.83	0.83
		2	0.79	0.82	0.8
		3	0.78	0.8	0.82
		4	0.8	0.83	0.83
		5	0.78	0.83	0.82
	Repetition 3	Sample	3	1	2
		1	0.8	0.78	0.8
		2	0.79	0.78	0.84
		3	0.82	0.82	0.8
		4	0.78	0.8	0.8
		5	0.79	0.78	0.8
	Repetition 4	Sample	2	3	1
		1	0.82	0.81	0.8
		2	0.82	0.78	0.79
		3	0.81	0.78	0.8
		4	0.83	0.79	0.79
		5	0.8	0.81	0.79
	Repetition 5	Sample	1	2	3
		1	0.77	0.82	0.82
		2	0.79	0.83	0.81
		3	0.77	0.8	0.84
		4	0.78	0.81	0.83
		5	0.8	0.82	0.8
	Repetition 6	Sample	3	1	2
		1	0.79	0.78	0.78
		2	0.82	0.77	0.79
		3	0.81	0.77	0.77
		4	0.8	0.78	0.77
		5	0.82	0.79	0.79
	Mean	Sample	1	2	3
		1	0.808	0.818	0.782
		2	0.82	0.786	0.822
		3	0.792	0.796	0.808
		4	0.816	0.794	0.794
		5	0.82	0.816	0.782
		6	0.778	0.78	0.808
		Gen. Mean	0.805667	0.798333	0.799333

## Sheet: 1 July 2023
	#	#	Subjects
	Repetition 1	Sample	3	2	1
		1	0.82	0.83	0.83
		2	0.81	0.82	0.8
		3	0.82	0.81	0.82
		4	0.83	0.83	0.82
		5	0.83	0.82	0.83
	Repetition 2	Sample	1	3	2
		1	0.82	0.82	0.82
		2	0.84	0.81	0.82
		3	0.78	0.82	0.82
		4	0.83	0.83	0.83
		5	0.81	0.82	0.82
	Repetition 3	Sample	3	1	2
		1	0.8	0.8	0.79
		2	0.81	0.84	0.81
		3	0.76	0.76	0.74
		4	0.82	0.82	0.81
		5	0.81	0.82	0.8
	Repetition 4	Sample	2	3	1
		1	0.79	0.8	0.83
		2	0.81	0.75	0.82
		3	0.83	0.8	0.81
		4	0.83	0.73	0.8
		5	0.83	0.82	0.83
	Repetition 5	Sample	1	2	3
		1	0.78	0.79	0.8
		2	0.82	0.8	0.82
		3	0.8	0.78	0.83
		4	0.79	0.79	0.84
		5	0.83	0.8	0.84
	Repetition 6	Sample	3	1	2
		1	0.81	0.79	0.83
		2	0.81	0.81	0.85
		3	0.81	0.81	0.84
		4	0.83	0.81	0.83
		5	0.83	0.79	0.8
	Mean	Sample	1	2	3
		1	0.822	0.822	0.82
		2	0.822	0.816	0.82
		3	0.808	0.8	0.79
		4	0.818	0.818	0.78
		5	0.826	0.792	0.804
		6	0.802	0.83	0.818
		Gen. Mean	0.816333	0.813	0.805333

## Sheet: 7 July 2023
	#	#	Subjects
	Repetition 1	Sample	3	2	1
		1	0.79	0.83	0.81
		2	0.8	0.8	0.83
		3	0.83	0.82	0.84
		4	0.81	0.84	0.78
		5	0.81	0.83	0.82
	Repetition 2	Sample	1	3	2
		1	0.77	0.78	0.78
		2	0.77	0.78	0.76
		3	0.78	0.76	0.77
		4	0.78	0.77	0.77
		5	0.77	0.78	0.78
	Repetition 3	Sample	3	1	2
		1	0.78	0.78	0.76
		2	0.78	0.78	0.79
		3	0.77	0.77	0.77
		4	0.79	0.77	0.77
		5	0.79	0.78	0.78
	Repetition 4	Sample	2	3	1
		1	0.76	0.79	0.78
		2	0.77	0.77	0.77
		3	0.79	0.79	0.78
		4	0.78	0.78	0.79
		5	0.78	0.77	0.8
	Repetition 5	Sample	1	2	3
		1	0.8	0.83	0.83
		2	0.81	0.8	0.82
		3	0.8	0.83	0.81
		4	0.82	0.82	0.8
		5	0.8	0.81	0.83
	Repetition 6	Sample	3	1	2
		1	0.8	0.79	0.78
		2	0.79	0.77	0.81
		3	0.77	0.78	0.77
		4	0.76	0.79	0.78
		5	0.77	0.78	0.79
	Mean	Sample	1	2	3
		1	0.808	0.824	0.816
		2	0.772	0.774	0.774
		3	0.776	0.782	0.774
		4	0.776	0.784	0.78
		5	0.818	0.818	0.806
		6	0.782	0.786	0.778
		Gen. Mean	0.788667	0.794667	0.788

## Sheet: 15 July 2023
	#	#	Subjects
	Repetition 1	Sample	3	2	1
		1	0.72	0.77	0.65
		2	0.71	0.76	0.67
		3	0.67	0.78	0.66
		4	0.71	0.76	0.69
		5	0.7	0.78	0.75
	Repetition 2	Sample	1	3	2
		1	0.73	0.76	0.71
		2	0.7	0.77	0.67
		3	0.76	0.73	0.59
		4	0.75	0.72	0.69
		5	0.73	0.75	0.72
	Repetition 3	Sample	3	1	2
		1	0.75	0.65	0.73
		2	0.78	0.6	0.72
		3	0.76	0.69	0.74
		4	0.76	0.72	0.72
		5	0.76	0.72	0.73
	Repetition 4	Sample	2	3	1
		1	0.74	0.72	0.68
		2	0.71	0.73	0.67
		3	0.72	0.68	0.63
		4	0.69	0.74	0.66
		5	0.68	0.72	0.67
	Repetition 5	Sample	1	2	3
		1	0.72	0.76	0.72
		2	0.74	0.76	0.74
		3	0.71	0.75	0.77
		4	0.74	0.71	0.76
		5	0.7	0.74	0.75
	Repetition 6	Sample	2	1	3
		1	0.73	0.66	0.72
		2	0.7	0.68	0.7
		3	0.68	0.66	0.75
		4	0.69	0.72	0.74
		5	0.72	0.73	0.73
	Mean	Sample	1	2	3
		1	0.702	0.77	0.684
		2	0.676	0.734	0.746
		3	0.676	0.762	0.728
		4	0.708	0.662	0.718
		5	0.748	0.744	0.722
		6	0.69	0.728	0.704
		Gen. Mean	0.7	0.733333	0.717

## Sheet: 22 July 2023
	#	#	Subjects
	Repetition 1	Sample	1	2	3
		1	0.68	0.7	0.7
		2	0.66	0.71	0.71
		3	0.65	0.7	0.69
		4	0.62	0.72	0.68
		5	0.66	0.7	0.67
	Repetition 2	Sample	2	3	1
		1	0.73	0.68	0.66
		2	0.8	0.61	0.69
		3	0.75	0.63	0.65
		4	0.76	0.64	0.63
		5	0.72	0.71	0.57
	Repetition 3	Sample	3	1	2
		1	0.65	0.76	0.73
		2	0.61	0.77	0.71
		3	0.64	0.74	0.7
		4	0.57	0.78	0.72
		5	0.62	0.79	0.75
	Repetition 4	Sample	1	3	2
		1	0.68	0.77	0.64
		2	0.68	0.75	0.69
		3	0.69	0.75	0.67
		4	0.7	0.76	0.73
		5	0.7	0.79	0.7
	Repetition 5	Sample	3	2	1
		1	0.68	0.78	0.66
		2	0.66	0.72	0.69
		3	0.73	0.77	0.7
		4	0.72	0.78	0.68
		5	0.78	0.8	0.67
	Repetition 6	Sample	3	1	2
		1	0.77	0.68	0.77
		2	0.79	0.69	0.74
		3	0.83	0.61	0.74
		4	0.78	0.64	0.74
		5	0.79	0.64	0.78
	Mean	Sample	1	2	3
		1	0.654	0.706	0.69
		2	0.64	0.752	0.654
		3	0.768	0.722	0.618
		4	0.69	0.686	0.764
		5	0.68	0.77	0.714
		6	0.652	0.754	0.792
		Gen. Mean	0.680667	0.731667	0.705333

## Sheet: 28 July 2023
	#	#	Subjects
	Repetition 1	Sample	1	2	3
		1	0.52	0.74	0.7
		2	0.55	0.71	0.68
		3	0.48	0.69	0.71
		4	0.56	0.68	0.69
		5	0.57	0.7	0.69
	Repetition 2	Sample	2	3	1
		1	0.62	0.68	0.51
		2	0.65	0.69	0.46
		3	0.67	0.68	0.44
		4	0.64	0.7	0.43
		5	0.64	0.68	0.45
	Repetition 3	Sample	3	1	2
		1	0.63	0.69	0.46
		2	0.61	0.67	0.44
		3	0.6	0.64	0.48
		4	0.59	0.69	0.51
		5	0.61	0.69	0.44
	Repetition 4	Sample	1	3	2
		1	0.53	0.69	0.71
		2	0.56	0.66	0.74
		3	0.55	0.7	0.76
		4	0.51	0.68	0.71
		5	0.51	0.7	0.72
	Repetition 5	Sample	3	2	1
		1	0.72	0.69	0.7
		2	0.71	0.66	0.66
		3	0.7	0.7	0.72
		4	0.7	0.68	0.74
		5	0.71	0.7	0.71
	Repetition 6	Sample	3	1	2
		1	0.71	0.56	0.75
		2	0.66	0.45	0.76
		3	0.66	0.48	0.78
		4	0.7	0.51	0.76
		5	0.68	0.5	0.77
	Mean	Sample	1	2	3
		1	0.536	0.704	0.694
		2	0.458	0.644	0.686
		3	0.676	0.466	0.608
		4	0.532	0.728	0.686
		5	0.706	0.686	0.708
		6	0.5	0.764	0.682
		Gen. Mean	0.568	0.665333	0.677333

## Sheet: 05 August 2023
	#	#	Subjects
	Repetition 1	Sample	1	2	3
		1	0.6	0.76	0.51
		2	0.58	0.71	0.66
		3	0.57	0.68	0.66
		4	0.57	0.57	0.59
		5	0.48	0.67	0.72
	Repetition 2	Sample	2	3	1
		1	0.62	0.64	0.57
		2	0.63	0.68	0.55
		3	0.57	0.53	0.51
		4	0.63	0.59	0.58
		5	0.57	0.54	0.53
	Repetition 3	Sample	3	1	2
		1	0.51	0.42	0.69
		2	0.59	0.47	0.6
		3	0.54	0.54	0.61
		4	0.46	0.53	0.67
		5	0.57	0.5	0.64
	Repetition 4	Sample	1	3	2
		1	0.51	0.66	0.74
		2	0.56	0.68	0.68
		3	0.55	0.62	0.72
		4	0.48	0.58	0.63
		5	0.5	0.64	0.76
	Repetition 5	Sample	3	2	1
		1	0.65	0.59	0.66
		2	0.66	0.62	0.68
		3	0.68	0.56	0.77
		4	0.72	0.63	0.68
		5	0.6	0.66	0.7
	Repetition 6	Sample	3	1	2
		1	0.59	0.52	0.71
		2	0.64	0.66	0.73
		3	0.57	0.43	0.76
		4	0.59	0.51	0.74
		5	0.59	0.48	0.74
	Mean	Sample	1	2	3
		1	0.56	0.678	0.628
		2	0.548	0.604	0.596
		3	0.492	0.642	0.534
		4	0.52	0.706	0.636
		5	0.698	0.612	0.662
		6	0.52	0.736	0.596
		Gen. Mean	0.556333	0.663	0.608667

[truncated: 2 more sheets: 10 August 2023, Combined]
