# Supplementary material for: Early detection of Cercospora beticola and powdery mildew diseases in sugar beet using uncrewed aerial vehicle-based remote sensing and machine learning
Source: PeerJ. 2025 Jun 3;13:e19530. doi: 10.7717/peerj.19530 (PMC12143290; doi:10.7717/peerj.19530)
Supplement: Supplemental Information 8 [file peerj-13-19530-s008.xlsx]

## Sheet: Metos
	CLS
		NDVI		2023-05-14		2023-06-23		2023-06-28		2023-07-03		2023-07-13		2023-07-18		2023-07-23		2023-07-28		2023-08-02		2023-08-07		2023-08-17		2023-08-22		2023-08-27		2023-09-01		2023-09-11
		0.9-1
		0.8-0.9			0.26	18.37	0.2	13.97			0.13	8.8	0.25	17.63					0.02	1.47					0.15	10.36	0.13	8.88			0.03	2.21
		0.7-0.8	0.16	11.09	0.18	12.56	0.25	17.7	0.52	36.12	0.41	28.79	0.37	25.88	0.54	37.59	0.52	36.13	0.68	47.03	0.49	33.96	0.23	16.26	0.05	3.69	0.04	2.95	0.18	12.57	0.19	13.31
		0.6-0.7	0.01	0.74	0.18	12.47	0.17	11.72	0.14	9.62	0.15	10.56	0.11	7.7	0.2	13.68	0.39	26.98	0.5	34.45	0.6	41.86	0.59	40.99	0.42	29.23	0.28	19.44	0.14	9.53	0.16	10.89
		0.5-0.6	0.17	11.64	0.13	8.79	0.15	10.28	0.11	7.86	0.12	8.35	0.19	13.03	0.2	13.66	0.27	18.75	0.05	3.61	0.21	14.83	0.52	36.25	0.65	45.47	0.52	36.09	0.17	11.52	0.86	59.62
		0.4-0.5	0.21	14.53	0.15	10.35	0.15	10.24	0.11	7.6	0.15	10.68	0.14	9.98	0.21	14.66	0.13	9.17	0.12	8.42	0.06	4.33	0.05	3.31	0.1	6.88	0.28	28.44	0.92	63.87	0.17	12.11
		0.3-0.4	0.48	33.21	0.04	2.64	0.02	1.27	0.17	12.13	0.17	11.66	0.16	11.21	0.14	9.77	0.09	6.48	0.06	3.91	0.05	3.22	0.02	1.34	0.06	4.37	0.06	4.19	0.02	1.35	0.01	0.71
		0.2-0.3	0.08	5.6	0.17	12.02	0.13	9.05	0.15	10.13	0.22	15.51	0.17	11.96	0.14	9.49	0.03	1.96	0.02	1.1	0.03	1.79	0.03	1.86					0.02	1.15	0.02	1.15
		0,1-0,2	0.24	16.57	0.31	21.59	0.33	23.25	0.23	16.01	0.08	5.64	0.03	2.06	0.02	1.15	0.01	0.54
		NDVI	0.9-1	0.8-0.9	0.7-0.8	0.6-0.7	0.5-0.6	0.4-0.5	0.3-0.4	0.2-0.3
		2023-05-14			11.09	0.74	11.64	14.53	33.21	5.6
		2023-06-23		18.37	12.56	12.47	8.79	10.35	2.64	12.02
		2023-06-28		13.97	17.7	11.72	10.28	10.24	1.27	9.05
		2023-07-03			36.12	9.62	7.86	7.6	12.13	10.13
		2023-07-13		8.8	28.79	10.56	8.35	10.68	11.66	15.51
		2023-07-18		17.63	25.88	7.7	13.03	9.98	11.21	11.96
		2023-07-23			37.59	13.68	13.66	14.66	9.77	9.49
		2023-07-28			36.13	26.98	18.75	9.17	6.48	1.96
		2023-08-02		1.47	47.03	34.45	3.61	8.42	3.91	1.1
		2023-08-07			33.96	41.86	14.83	4.33	3.22	1.79
		2023-08-17			16.26	40.99	36.25	3.31	1.34	1.86
		2023-08-22		10.36	3.69	29.23	45.47	6.88	4.37
		2023-08-27		8.88	2.95	19.44	36.09	28.44	4.19
		2023-09-01			12.57	9.53	11.52	63.87	1.35	1.15
		2023-09-11		2.21	13.31	10.89	59.62	12.11	0.71	1.15
	PM
		NDVI		2023-07-03		2023-07-13		2023-07-18		2023-07-23		2023-07-28		2023-08-02		2023-08-07		2023-08-12		2023-08-17		2023-08-22		2023-08-27		2023-09-01		2023-09-06		2023-09-11		2023-09-16		2023-09-21		2023-10-06		2023-10-11		2023-10-16		2023-10-21
		0.9-1
		0.8-0.9									0.58	31.31	0.14	7.76	0.35	18.83	0.58	31.54			0.15	8.29	0.19	10.51	0.01	0.55	0.07	3.87
		0.7-0.8			0.2	11.09	0.65	35.41	0.89	48.11	0.81	44.12	1.25	68.13	1.06	57.69	0.83	45.05	1.2	65.4	1.21	65.76	1.16	62.77	0.99	53.58	0.7	38.26	0.19	10.53	0.5	27.11	0.34	18.25			0.02	1.11	0.01	0.55
		0.6-0.7			1.14	61.72	0.75	40.7	0.57	31.2	0.15	8.02	0.24	12.91	0.16	8.45	0.23	12.66	0.35	18.87	0.26	14.32	0.27	14.46	0.54	29.16	0.7	37.94	0.88	47.65	0.92	49.84	1	54.17	0.25	13.77	1.22	66.29	1.02	55.28	0.57	27.04
		0.5-0.6	0.19	10.5	0.23	12.57	0.13	6.91	0.16	8.43	0.09	4.95	0.07	3.86	0.1	5.51	0.09	4.91	0.09	4.81	0.09	4.68	0.09	4.8	0.14	7.7	0.11	6.19	0.47	25.62	0.2	10.83	0.24	13.01	1.15	62.65	0.36	19.66	0.52	27.99	1.01	55
		0.4-0.5	1.05	56.79	0.09	5.15	0.12	6.49	0.09	5.11	0.09	4.9	0.06	3.42	0.07	3.87	0.04	2.25	0.08	4.42	0.06	3.03	0.06	3.34	0.06	3.37	0.11	6.02	0.16	8.43	0.09	4.86	0.13	7.02	0.22	12.07	0.11	6.21	0.14	7.63	0.19	10.2
		0.3-0.4	0.37	19.87	0.1	5.17	0.11	6.03	0.08	4.08	0.07	3.62	0.02	1.24	0.04	2.33	0.03	1.66	0.06	3.16	0.02	1.24	0.04	2.19	0.05	2.86	0.06	3.1	0.06	3.2	0.07	3.76	0.07	3.58	0.1	5.49	0.07	4.06	0.07	3.84	0.08	4.53
		0.2-0.3	0.14	7.85	0.04	2.2	0.05	2.89	0.02	0.97	0.03	1.52	0.03	1.81	0.03	1.89	0.02	1.1	0.03	1.66	0.03	1.81	0.02	1.06	0.01	0.56	0.03	1.83	0.03	1.77	0.03	1.66	0.03	1.57	0.07	3.62	0.03	1.81	0.04	2.31	0.04	2.03
		0,1-0,2	0.07	3.93	0.03	1.83	0.02	1.28	0.03	1.5	0.02	1.28	0.01	0.38	0.02	1.08	0.02	0.83	0.03	1.68	0	0.04	0	0.04	0.03	1.62	0.04	2.18	0.05	2.45	0.02	1.1	0.03	1.57	0.03	1.57	0	0.04	0.03	1.57	0.01	0.37
		NDVI	0.9-1	0.8-0.9	0.7-0.8	0.6-0.7	0.5-0.6	0.4-0.5	0.3-0.4	0.2-0.3
		2023-07-03					10.5	56.79	19.87	7.85
		2023-07-13			11.09	61.72	12.57	5.15	5.17	2.2
		2023-07-18			35.41	40.7	6.91	6.49	6.03	2.89
		2023-07-23			48.11	31.2	8.43	5.11	4.08	0.97
		2023-07-28		31.31	44.12	8.02	4.95	4.9	3.62	1.52
		2023-08-02		7.76	68.13	12.91	3.86	3.42	1.24	1.81
		2023-08-07		18.83	57.69	8.45	5.51	3.87	2.33	1.89
		2023-08-12		31.54	45.05	12.66	4.91	2.25	1.66	1.1
		2023-08-17			65.4	18.87	4.81	4.42	3.16	1.66
		2023-08-22		8.29	65.76	14.32	4.68	3.03	1.24	1.81
		2023-08-27		10.51	62.77	14.46	4.8	3.34	2.19	1.06
		2023-09-01		0.55	53.58	29.16	7.7	3.37	2.86	0.56
		2023-09-06		3.87	38.26	37.94	6.19	6.02	3.1	1.83
		2023-09-11			10.53	47.65	25.62	8.43	3.2	1.77
		2023-09-16			27.11	49.84	10.83	4.86	3.76	1.66
		2023-09-21			18.25	54.17	13.01	7.02	3.58	1.57
		2023-10-06				13.77	62.65	12.07	5.49	3.62
		2023-10-11			1.11	66.29	19.66	6.21	4.06	1.81
		2023-10-16			0.55	55.28	27.99	7.63	3.84	2.31
		2023-10-21				27.04	55	10.2	4.53	2.03
