# Supplementary material for: Early detection of Cercospora beticola and powdery mildew diseases in sugar beet using uncrewed aerial vehicle-based remote sensing and machine learning
Source: PeerJ. 2025 Jun 3;13:e19530. doi: 10.7717/peerj.19530 (PMC12143290; doi:10.7717/peerj.19530)
Supplement: Supplemental Information 9 [file peerj-13-19530-s009.xls]

## Sheet: Chart
Date/Time	Average air temperature [°C]	Average relative humidity [%]	Total precipitation [mm]	Wind speed [km/h]
2022-10-01	18.69	67.19	0	2.7
2022-09-30	16.77	78.48	0	3
2022-09-29	16.31	75.85	0	1.3
2022-09-28	19.95	54.49	2.6	2
2022-09-27	15.59	39.2	0	3.3
2022-09-26	11.74	53.22	0	3.8
2022-09-25	9.21	63.68	0	3.7
2022-09-24	10.38	64.89	0	3.9
2022-09-23	9.63	68.13	0	3.5
2022-09-22	11.13	78.48	0	5.8
2022-09-21	14.09	68.28	0	3.6
2022-09-20	15.84	64.72	0	2.9
2022-09-19	18.2	68.39	0	2.9
2022-09-18	20.69	55.98	0	3.3
2022-09-17	21.52	51.95	0	2.9
2022-09-16	18.8	59.32	0	3.9
2022-09-15	15.25	58.79	0	3.8
2022-09-14	13.5	66.63	0	3.1
2022-09-13	15.48	70.81	0.2	2.7
2022-09-12	17.95	77.39	0.4	3.4
2022-09-11	20.74	54.42	0	2.8
2022-09-10	17.9	57.33	0	3.8
2022-09-09	16.08	62.73	0	4.2
2022-09-08	14.8	64.89	0	3.4
2022-09-07	15.5	71.96	0	3
2022-09-06	16.68	69.82	0	3.7
2022-09-05	18.93	71.65	0	3.3
2022-09-04	21.25	71.56	0	2.7
2022-09-03	23.14	70.22	0	2.2
2022-09-02	23.04	68.52	0	2.7
2022-09-01	22.24	77.05	0	2.6
2022-08-31	23.44	77.95	0	2.6
2022-08-30	24.72	61.4	0	3.1
2022-08-29	23.54	64.33	0	3.3
2022-08-28	23.48	68.72	0	2.6
2022-08-27	20.62	73.04	0	2.2
2022-08-26	19.56	83.17	0.4	2.7
2022-08-25	19.62	82.75	0	2.5
2022-08-24	22.25	74.54	2.8	2.8
2022-08-23	23.98	62.89	0	3
2022-08-22	23.17	74.49	1.4	2.9
2022-08-21	23.79	63.21	0	3.2
2022-08-20	22.32	67.42	0	2.6
2022-08-19	21.71	66.39	0	3
2022-08-18	23.07	60.53	0	2.7
2022-08-17	22.84	63.77	0	3
2022-08-16	20.35	67.98	0	3
2022-08-15	20.61	80.84	8	1.1
2022-08-14	21.29	78.59	0.6	2.9
2022-08-13	21.21	77.84	3	4.6
2022-08-12	21.65	67.43	0	3.5
2022-08-11	21.32	64.44	0	3.1
2022-08-10	22	73.05	0	3
2022-08-09	21.86	82.75	1.2	2.6
2022-08-08	22.35	77.51	0.6	3.1
2022-08-07	22.93	71.89	0	3.1
2022-08-06	23.76	75.77	0	3.4
2022-08-05	24.29	72.43	0	3.3
2022-08-04	24.08	69.46	0.6	3.4
2022-08-03	22.91	63.53	0	3.4
2022-08-02	22.06	63.73	0	2.9
2022-08-01	23.1	67.53	0	2.7
2022-07-31	23	66.8	0	2.5
2022-07-30	24.43	55.31	0	2.4
2022-07-29	24.38	48.48	0	3.1
2022-07-28	23.43	49.43	0	3.7
2022-07-27	21.89	56.51	0	3.6
2022-07-26	21.91	56.31	0	3.2
2022-07-25	19.27	55.34	0	3.3

## Sheet: Chart2
Date/Time	Average air temperature [°C]	Average relative humidity [%]	Total precipitation [mm]	Leaf wetness [saat]	NDVI2	GS-S1	GS-S2	GS-S3	MS1	MS2	MS3
2022-07-25	19.27	55.34	0	0	19.12	64	65	62	29.67	29.9117	28.4933
2022-07-26	21.91	56.31	0	0
2022-07-27	21.89	56.51	0	1.45
2022-07-28	23.43	49.43	0	2.25	27.75
2022-07-29	24.38	48.48	0	0
2022-07-30	24.43	55.31	0	0		64	65	62	29.67	29.9117	28.4933
2022-07-31	23	66.8	0	0
2022-08-01	23.1	67.53	0	4.5
2022-08-02	22.06	63.73	0	0	26.97
2022-08-03	22.91	63.53	0	0
2022-08-04	24.08	69.46	0.6	0
2022-08-05	24.29	72.43	0	5.25
2022-08-06	23.76	75.77	0	5
2022-08-07	22.93	71.89	0	0	68.19
2022-08-08	22.35	77.51	0.6	0
2022-08-09	21.86	82.75	1.2	0
2022-08-10	22	73.05	0	0
2022-08-11	21.32	64.44	0	0		68	68	68	17.2533	18.8983	19.0383
2022-08-12	21.65	67.43	0	0	15.84
2022-08-13	21.21	77.84	3	0
2022-08-14	21.29	78.59	0.6	4.25
2022-08-15	20.61	80.84	8	0
2022-08-16	20.35	67.98	0	0
2022-08-17	22.84	63.77	0	0	41.47
2022-08-18	23.07	60.53	0	0
2022-08-19	21.71	66.39	0	1
2022-08-20	22.32	67.42	0	5
2022-08-21	23.79	63.21	0	0
2022-08-22	23.17	74.49	1.4	7.75	9.57
2022-08-23	23.98	62.89	0	0		68	68	68	25.125	27.3533	23.4033
2022-08-24	22.25	74.54	2.8	0
2022-08-25	19.62	82.75	0	0
2022-08-26	19.56	83.17	0.4	4.25
2022-08-27	20.62	73.04	0	0	32.41
2022-08-28	23.48	68.72	0	0
2022-08-29	23.54	64.33	0	0
2022-08-30	24.72	61.4	0	0
2022-08-31	23.44	77.95	0	0
2022-09-01	22.24	77.05	0	0
2022-09-02	23.04	68.52	0	0
2022-09-03	23.14	70.22	0	0		69	69	69	11.7833	11.5033	12.155
2022-09-04	21.25	71.56	0	0
2022-09-05	18.93	71.65	0	0
2022-09-06	16.68	69.82	0	3.25
2022-09-07	15.5	71.96	0	0		68	66	68	11.7967	11.3083	12.2133
2022-09-08	14.8	64.89	0	0
2022-09-09	16.08	62.73	0	0
2022-09-10	17.9	57.33	0	0
2022-09-11	20.74	54.42	0	0	61.52
2022-09-12	17.95	77.39	0.4	0
2022-09-13	15.48	70.81	0.2	2.25
2022-09-14	13.5	66.63	0	4.25
2022-09-15	15.25	58.79	0	0		66	67	67	11.7967	11.3083	12.2133
2022-09-16	18.8	59.32	0	0	45.64
2022-09-17	21.52	51.95	0	0
2022-09-18	20.69	55.98	0	0
2022-09-19	18.2	68.39	0	0
2022-09-20	15.84	64.72	0	0
2022-09-21	14.09	68.28	0	0	51.18
2022-09-22	11.13	78.48	0	0
2022-09-23	9.63	68.13	0	2.25		68	65	68	16.2033	17.3867	15.9067
2022-09-24	10.38	64.89	0	0
2022-09-25	9.21	63.68	0	0
2022-09-26	11.74	53.22	0	0	44.07
2022-09-27	15.59	39.2	0	0
2022-09-28	19.95	54.49	2.6	0
2022-09-29	16.31	75.85	0	4.25
2022-09-30	16.77	78.48	0	0
2022-10-01	18.69	67.19	0	0	27.3	64	63	62	17.8567	19.5467	18.6383
			21.8	56.95
		2023-07-20	18.6	40.7
