# Supplementary material for: Early detection of Cercospora beticola and powdery mildew diseases in sugar beet using uncrewed aerial vehicle-based remote sensing and machine learning
Source: PeerJ. 2025 Jun 3;13:e19530. doi: 10.7717/peerj.19530 (PMC12143290; doi:10.7717/peerj.19530)
Supplement: Supplemental Information 10 [file peerj-13-19530-s010.xlsx]

## Sheet: MS_PM
	2022-07-30				2022-08-11				2022-08-23				2022-09-03				2022-09-07				2022-09-15				2022-09-23				2022-10-01
		Min	Max			Min	Max			Min	Max			Min	Max			Min	Max			Min	Max			Min	Max			Min	Max			Min	Max			Min	Max			Min	Max			Min	Max
Green		0.73	0.91			0.82	0.95			0.88	0.96			0.83	0.93			0.82	0.94			0.83	0.98			0.83	0.95			0.82	0.96
Yellow		0.6	0.73			0.72	0.82			0.82	0.88			0.75	0.83			0.74	0.82			0.69	0.83			0.72	0.83			0.68	0.82
Orange1		0.45	0.6			0.68	0.72			0.75	0.82			0.67	0.75			0.66	0.74			0.55	0.69			0.61	0.72			0.55	0.68
Orange2		0.27	0.45			0.46	0.68			0.68	0.75			0.59	0.67			0.57	0.66			0.41	0.55			0.5	0.61			0.41	0.55
Red		0.6	0.27			0.26	0.46			0.6	0.68			0.5	0.59			0.48	0.57			0.27	0.41			0.39	0.5			0.28	0.41
	T1P1	T1P2	T1P3		T1P1	T1P2	T1P3	1. Spray (12.08.2022)	T1P1	T1P2	T1P3		T1P1	T1P2	T1P3	2. Spray (05.09.2022)	T1P1	T1P2	T1P3		T1P1	T1P2	T1P3		T1P1	T1P2	T1P3	3. Spray (24.09.2022)	T1P1	T1P2	T1P3		T1P1	T1P2	T1P3		T1P1	T1P2	T1P3		T1P1	T1P2	T1P3		T1P1	T1P2	T1P3
Green	33.37	35.96	29.34		22.28	15.85	21.64		24.95	23.96	25.67		16.41	11.52	14.05		13.37	12.29	12.67		23.28	15.85	21.64		19.96	18.83	12.62		22.22	18.1	18.03
Yellow	33.39	32.26	28.46		42.46	44.59	44.11		41.17	41.43	36.39		41.01	36.05	30.61		39.53	37.42	38.32		42.46	44.59	44.11		38.98	41.9	39.95		37.87	41.27	39.94
Orange1	17.81	16.46	18.83		24.02	29.17	24.96		20.32	19.89	20.26		29.45	35.79	31.43		29.6	34.5	33.96		24.02	29.17	24.96		26.58	27.88	32.75		25.47	28.06	27.94
Orange2	11	10.38	15		8	8.72	7.53		8.92	9.1	10.88		9.8	13.57	19.46		9.83	11.41	11.91		8	8.72	7.53		10.89	9.45	12.04		10.15	9.91	10.78
Red	4.43	4.93	8.35		2.34	1.67	1.76		4.64	5.62	6.8		3.33	3.07	4.45		7.67	4.38	3.14		2.34	1.67	1.76		3.6	1.95	2.64		4.29	2.66	3.31
	T2P2	T2P3	T2P1		T2P2	T2P3	T2P1		T2P2	T2P3	T2P1		T2P2	T2P3	T2P1		T2P2	T2P3	T2P1		T2P2	T2P3	T2P1		T2P2	T2P3	T2P1		T2P2	T2P3	T2P1		T2P2	T2P3	T2P1		T2P2	T2P3	T2P1		T2P2	T2P3	T2P1		T2P2	T2P3	T2P1
Green	30.44	31.93	35.49		21.48	17.11	12.13		32.36	25.08	26.71		12.85	9.2	11.28		13.88	10.34	10.42		27.85	15.75	18.63		23.48	17.11	12.13		23.12	18.32	15.81
Yellow	31.67	32.73	33.7		40.37	39.22	36.31		37.93	40.52	36.26		37.04	34.31	35.71		42.02	36.95	34.58		35.65	37.45	42.69		40.37	39.22	36.31		38.79	38.42	39.5
Orange1	17.77	17.52	16.05		25.4	28.46	32.71		17.11	19.62	19.33		34.42	37.58	35.56		31.35	35.52	35.84		22.83	29.22	27.3		25.4	28.46	32.71		25.67	28.3	29.51
Orange2	12.77	11.2	10.03		8.52	12.06	14.78		8.18	9.02	10.28		12.94	15.31	14.53		9.12	13.46	14.74		10.11	13.32	9.17		8.52	12.06	14.78		9.57	12.79	11.78
Red	7.35	6.63	4.74		2.22	3.15	4.07		4.42	5.76	7.43		2.75	3.6	2.92		3.63	3.73	4.42		3.56	4.26	2.2		2.22	3.15	4.07		2.86	7.18	3.4
	T3P2	T3P1	T3P3		T3P2	T3P1	T3P3		T3P2	T3P1	T3P3		T3P2	T3P1	T3P3		T3P2	T3P1	T3P3		T3P2	T3P1	T3P3		T3P2	T3P1	T3P3		T3P2	T3P1	T3P3		T3P2	T3P1	T3P3		T3P2	T3P1	T3P3		T3P2	T3P1	T3P3		T3P2	T3P1	T3P3
Green	30.61	37.82	37.22		16.81	16.34	11.39		26.26	28.05	25.56		12.68	9.71	9.79		10.06	12.05	9.34		22.02	16.09	16		15.19	17.86	8.61		16.81	16.34	11.39
Yellow	29.26	32.27	32.04		37.16	41.31	32.88		37.95	42.26	32.51		35.97	32.73	32.39		36.85	39.03	33.57		38.35	40.24	40.29		38.19	41.97	30.28		37.16	41.31	32.88
Orange1	17.83	15.75	15.67		28.43	29.25	32.54		19.91	17.32	20.95		33.37	37.23	37.99		35.09	34.43	38.47		25.09	28.79	28.9		28.97	27.94	35.63		28.43	29.25	32.54
Orange2	12.32	8.98	10.64		13.04	10.45	17.51		9.74	7.85	12.63		13.74	16.4	16.3		13.21	11.33	15.35		10.82	11.65	11.62		13.33	9.94	20.62		13.04	10.45	17.51
Red	9.97	5.18	4.43		4.56	2.64	5.67		6.14	4.52	8.64		4.23	3.94	3.53		4.79	3.16	3.28		3.73	3.23	3.19		4.32	2.29	4.86		4.56	2.64	5.67
	T4P1	T4P3	T4P2		T4P1	T4P3	T4P2		T4P1	T4P3	T4P2		T4P1	T4P3	T4P2		T4P1	T4P3	T4P2		T4P1	T4P3	T4P2		T4P1	T4P3	T4P2		T4P1	T4P3	T4P2		T4P1	T4P3	T4P2		T4P1	T4P3	T4P2		T4P1	T4P3	T4P2		T4P1	T4P3	T4P2
Green	26.9	35.22	29.77		19.11	18.78	19.32		24.79	20.55	30.71		15.22	10.51	11		13.68	12.39	9.87		28.86	17.22	20.51		16.47	21.59	13.12		19.11	18.78	19.32
Yellow	33.57	33.44	34.64		43.35	42.06	41.92		42.1	42.54	38.18		41.72	35.85	30.2		44.2	38.89	35.23		41.89	41.4	43.4		43.56	41.21	38.23		43.35	42.06	41.92
Orange1	18.71	15.86	17.12		27.03	25.35	27.47		20.97	23.06	16.68		31.56	34.53	32.49		31.82	32.03	37.43		22.09	28.07	25.79		29.19	25.64	33.99		27.03	25.35	27.47
Orange2	12.51	9.39	11.11		8.21	9.96	9.18		8.88	9.06	8.44		9.04	14.44	21.57		7.49	11.48	14.84		7.09	10.41	8.38		8.71	8.75	12.52		8.21	9.96	9.18
Red	8.31	5.98	7.35		2.3	3.85	2.11		3.26	4.78	6		2.46	4.67	4.74		2.8	5.21	2.62		2.07	2.9	1.92		2.08	2.81	2.14		2.3	3.85	2.11
	T5P3	T5P2	T5P1		T5P3	T5P2	T5P1		T5P3	T5P2	T5P1		T5P3	T5P2	T5P1		T5P3	T5P2	T5P1		T5P3	T5P2	T5P1		T5P3	T5P2	T5P1		T5P3	T5P2	T5P1		T5P3	T5P2	T5P1		T5P3	T5P2	T5P1		T5P3	T5P2	T5P1		T5P3	T5P2	T5P1
Green	28.94	29.61	27.94		18.9	16.98	12.59		18.9	17.1	26.94		12.9	8.76	8.4		11.99	8.38	8.99		21.98	18.94	18.9		15.31	17.18	11.45		18.9	16.98	12.59
Yellow	30.55	33.3	38.67		40.76	39.47	32.9		41.67	45.39	39.29		38.46	32.89	32.24		38.64	33.96	32.49		41.31	41.18	34.76		39.81	38.88	32.36		40.76	39.47	32.9
Orange1	19.73	19.05	18.39		27.16	28.34	30.64		27.01	24.57	18.6		33.58	38.15	38.23		32.31	38.82	37.56		24.74	26.78	26.5		30.07	29.01	31.41		27.16	28.34	30.64
Orange2	13.39	12.12	10.24		9.77	11.38	16.99		9.11	9.16	9.52		11.64	16.2	17.46		10.91	15.15	17.02		9.26	10.11	13.76		11.58	11.77	18.19		9.77	11.38	16.99
Red	7.38	5.91	4.75		3.4	3.83	6.89		3.3	3.78	5.66		3.41	4	3.67		6.15	3.7	3.94		2.71	3	6.09		3.23	3.16	6.6		3.4	3.83	6.89
	T6P3	T6P1	T6P2		T6P3	T6P1	T6P2		T6P3	T6P1	T6P2		T6P3	T6P1	T6P2		T6P3	T6P1	T6P2		T6P3	T6P1	T6P2		T6P3	T6P1	T6P2		T6P3	T6P1	T6P2		T6P3	T6P1	T6P2		T6P3	T6P1	T6P2		T6P3	T6P1	T6P2		T6P3	T6P1	T6P2
Green	8.31	16.5	23.08		26.41	21.07	22.95		24.66	19.31	33.73		16.48	9.68	12.21		16.55	12.27	13.37		26.69	19.33	23.02		20.2	19.35	16.52		26.41	21.07	22.95
Yellow	29.8	35.49	32.88		42.36	37.06	40.46		39.27	46.55	40.46		43.31	31.43	36.53		42.87	35.4	36.4		44.23	37.16	38.59		44.25	37.62	38.97		42.36	37.06	40.46
Orange1	32.05	27.24	21.62		23.48	27.15	25.19		24.03	23.05	15.55		30.1	34.15	33.66		30.6	33.33	31.74		21.37	27.03	25.63		26.31	27.32	28.53		23.48	27.15	25.19
Orange2	21.13	15.99	15.43		6.09	10.92	8.87		9.59	8.02	7.09		8.29	18.21	14		8.1	13.26	13.51		6.31	12.11	10.01		7.86	12.28	12.54		6.09	10.92	8.87
Red	8.71	4.78	6.99		1.66	3.8	2.53		2.46	3.06	3.17		1.82	6.53	3.6		1.87	5.65	4.98		1.4	4.38	2.75		1.39	3.44	3.43		1.66	3.8	2.53
	2022-07-30				2022-08-11				2022-08-23				2022-09-03				2022-09-07				2022-09-15				2022-09-23
	1	2	3		1	2	3		1	2	3		1	2	3		1	2	3		1	2	3		1	2	3		1	2	3		1	2	3		1	2	3		1	2	3		1	2	3
Green	29.67	29.9117	28.4933		17.2533	18.8983	19.0383		25.125	27.3533	23.4033		11.7833	11.5033	12.155		11.7967	11.3083	12.2133		20.8483	21.365	19.88		16.2033	17.3867	15.9067		17.8567	19.5467	18.6383		#DIV/0!	#DIV/0!	#DIV/0!		#DIV/0!	#DIV/0!	#DIV/0!		#DIV/0!	#DIV/0!	#DIV/0!		#DIV/0!	#DIV/0!	#DIV/0!
Yellow	34.515	32.335	31.17		38.8983	40.6617	40.2317		41.2717	40.2233	38.8167		35.8067	34.78	35.8217		37.5383	36.98	38.2067		39.8667	40.2933	41.465		38.4667	39.4233	39.12		38.665	39.845	39.4033		#DIV/0!	#DIV/0!	#DIV/0!		#DIV/0!	#DIV/0!	#DIV/0!		#DIV/0!	#DIV/0!	#DIV/0!		#DIV/0!	#DIV/0!	#DIV/0!
Orange1	18.9917	18.3083	19.9433		28.4667	27.3333	26.9917		19.9317	18.9517	22.4883		34.3633	34.6467	34.2017		33.7633	34.8217	33.815		25.955	25.8817	26.21		29.1917	28.9633	29.81		28.175	27.1933	27.4617		#DIV/0!	#DIV/0!	#DIV/0!		#DIV/0!	#DIV/0!	#DIV/0!		#DIV/0!	#DIV/0!	#DIV/0!		#DIV/0!	#DIV/0!	#DIV/0!
Orange2	11.4583	12.355	13.4583		11.5583	9.95167	10.4867		8.91167	8.61833	10.0483		14.24	15.3367	14.24		12.2783	12.8733	11.8683		10.2967	9.69167	9.74167		12.465	11.355	12.1517		11.4167	10.325	11.15		#DIV/0!	#DIV/0!	#DIV/0!		#DIV/0!	#DIV/0!	#DIV/0!		#DIV/0!	#DIV/0!	#DIV/0!		#DIV/0!	#DIV/0!	#DIV/0!
Red	5.365	7.08333	6.91333		3.67333	2.82	3.24833		4.76167	4.855	5.29		3.80833	3.73167	3.58		4.60667	4.01667	3.89667		3.385	2.77167	2.70333		3.68	2.87	3.01333		3.88667	3.09167	4.17833		#DIV/0!	#DIV/0!	#DIV/0!		#DIV/0!	#DIV/0!	#DIV/0!		#DIV/0!	#DIV/0!	#DIV/0!		#DIV/0!	#DIV/0!	#DIV/0!

## Sheet: MS_Chart
		1	2	3				2022-07-30	2022-08-11	2022-08-23	2022-09-03	2022-09-07	2022-09-15	2022-09-23	2022-10-01
2022-07-30	Green	29.67	29.9117	28.4933		Green	1	29.67	17.2533	25.125	11.7833	11.7967	20.8483	16.2033	17.8567	0	0	0
	Yellow	34.515	32.335	31.17			2	29.9117	18.8983	27.3533	11.5033	11.3083	21.365	17.3867	19.5467	0	0	0
	Orange1	18.9917	18.3083	19.9433			3	28.4933	19.0383	23.4033	12.155	12.2133	19.88	15.9067	18.6383	0	0	0
	Orange2	11.4583	12.355	13.4583
	Red	5.365	7.08333	6.91333
2022-08-11	Green	17.2533	18.8983	19.0383
	Yellow	38.8983	40.6617	40.2317
	Orange1	28.4667	27.3333	26.9917
	Orange2	11.5583	9.95167	10.4867
	Red	3.67333	2.82	3.24833
2022-08-23	Green	25.125	27.3533	23.4033
	Yellow	41.2717	40.2233	38.8167
	Orange1	19.9317	18.9517	22.4883
	Orange2	8.91167	8.61833	10.0483
	Red	4.76167	4.855	5.29
2022-09-03	Green	11.7833	11.5033	12.155
	Yellow	35.8067	34.78	35.8217
	Orange1	34.3633	34.6467	34.2017
	Orange2	14.24	15.3367	14.24
	Red	3.80833	3.73167	3.58
2022-09-07	Green	11.7967	11.3083	12.2133
	Yellow	37.5383	36.98	38.2067				2022-07-30	2022-08-11	2022-08-23	2022-09-03	2022-09-07	2022-09-15	2022-09-23	2022-10-01
	Orange1	33.7633	34.8217	33.815		Yellow	1	34.515	38.8983	41.2717	35.8067	37.5383	39.8667	38.4667	38.665	0	0	0
	Orange2	12.2783	12.8733	11.8683			2	32.335	40.6617	40.2233	34.78	36.98	40.2933	39.4233	39.845	0	0	0
	Red	4.60667	4.01667	3.89667			3	31.17	40.2317	38.8167	35.8217	38.2067	41.465	39.12	39.4033	0	0	0
2022-09-15	Green	20.8483	21.365	19.88
	Yellow	39.8667	40.2933	41.465
	Orange1	25.955	25.8817	26.21
	Orange2	10.2967	9.69167	9.74167
	Red	3.385	2.77167	2.70333
2022-09-23	Green	16.2033	17.3867	15.9067
	Yellow	38.4667	39.4233	39.12
	Orange1	29.1917	28.9633	29.81
	Orange2	12.465	11.355	12.1517
	Red	3.68	2.87	3.01333
2022-10-01	Green	17.8567	19.5467	18.6383
	Yellow	38.665	39.845	39.4033
	Orange1	28.175	27.1933	27.4617
	Orange2	11.4167	10.325	11.15
	Red	3.88667	3.09167	4.17833
	Green
	Yellow
	Orange1
	Orange2							2022-07-30	2022-08-11	2022-08-23	2022-09-03	2022-09-07	2022-09-15	2022-09-23	2022-10-01
	Red					Orange1	1	18.9917	28.4667	19.9317	34.3633	33.7633	25.955	29.1917	28.175	0	0	0
	Green						2	18.3083	27.3333	18.9517	34.6467	34.8217	25.8817	28.9633	27.1933	0	0	0
	Yellow						3	19.9433	26.9917	22.4883	34.2017	33.815	26.21	29.81	27.4617	0	0	0
	Orange1
	Orange2
	Red
	Green
	Yellow
	Orange1
	Orange2
	Red
								2022-07-30	2022-08-11	2022-08-23	2022-09-03	2022-09-07	2022-09-15	2022-09-23	2022-10-01
						Orange2	1	11.4583	11.5583	8.91167	14.24	12.2783	10.2967	12.465	11.4167	0	0	0
							2	12.355	9.95167	8.61833	15.3367	12.8733	9.69167	11.355	10.325	0	0	0
							3	13.4583	10.4867	10.0483	14.24	11.8683	9.74167	12.1517	11.15	0	0	0
								2022-07-30	2022-08-11	2022-08-23	2022-09-03	2022-09-07	2022-09-15	2022-09-23	2022-10-01
						Red	1	5.365	3.67333	4.76167	3.80833	4.60667	3.385	3.68	3.88667	0	0	0
							2	7.08333	2.82	4.855	3.73167	4.01667	2.77167	2.87	3.09167	0	0	0
							3	6.91333	3.24833	5.29	3.58	3.89667	2.70333	3.01333	4.17833	0	0	0
