# Supplementary material for: Early detection of Cercospora beticola and powdery mildew diseases in sugar beet using uncrewed aerial vehicle-based remote sensing and machine learning
Source: PeerJ. 2025 Jun 3;13:e19530. doi: 10.7717/peerj.19530 (PMC12143290; doi:10.7717/peerj.19530)
Supplement: Supplemental Information 11 [file peerj-13-19530-s011.xlsx]

## Sheet: 30 July 2022
	#	#	Subjects
	Repetition 1	Sample	1	2	3
		1	71	64	60
		2	88	74	67
		3	66	57	70
		4	70	66	72
		5	73	71	71
	Repetition 2	Sample	2	3	1
		1	59	71	50
		2	59	73	61
		3	56	64	63
		4	58	41	70
		5	72	61	66
	Repetition 3	Sample	2	1	3
		1	64	73	61
		2	55	67	73
		3	58	59	72
		4	61	73	49
		5	53	71	63
	Repetition 4	Sample	1	3	2
		1	58	74	50
		2	58	69	60
		3	62	70	64
		4	64	72	48
		5	64	59	62
	Repetition 5	Sample	3	2	1
		1	70	70	58
		2	61	77	62
		3	68	60	54
		4	64	70	55
		5	56	69	61
	Repetition 6	Sample	3	1	2
		1	53	62	57
		2	58	61	65
		3	58	62	59
		4	51	69	69
		5	45	70	74
	Mean	Sample	1	2	3
		1	68	66.4	73.6
		2	60.8	62	62
		3	68.6	63.6	58.2
		4	56.8	61.2	68.8
		5	63.8	69.2	58
		6	64.8	64.8	53
		Gen. Mean	0.638	0.645333	0.622667

## Sheet: 11 August 2022
	#	#	Subjects
	Repetition 1	Sample	1	2	3
		1	72	65	63
		2	67	69	64
		3	72	70	70
		4	71	68	67
		5	66	67	65
	Repetition 2	Sample	2	3	1
		1	71	69	66
		2	71	70	66
		3	67	70	69
		4	72	66	65
		5	71	69	64
	Repetition 3	Sample	2	1	3
		1	70	70	49
		2	68	70	64
		3	67	63	64
		4	65	67	69
		5	71	69	67
	Repetition 4	Sample	1	3	2
		1	73	68	66
		2	73	70	62
		3	70	70	67
		4	72	67	68
		5	74	64	69
	Repetition 5	Sample	3	2	1
		1	69	74	64
		2	73	74	64
		3	71	66	62
		4	69	72	67
		5	71	70	64
	Repetition 6	Sample	3	1	2
		1	71	64	65
		2	72	66	65
		3	67	66	62
		4	69	62	66
		5	73	64	68
	Mean	Sample	1	2	3
		1	65.8	67.8	69.6
		2	70.4	66	68.8
		3	67.8	62.6	68.2
		4	66.4	72.4	67.8
		5	70.6	71.2	64.2
		6	64.4	65.2	70.4
		Gen. Mean	0.675667	0.675333	0.681667

## Sheet: 23 August 2022 
	#	#	Subjects
	Repetition 1	Sample	1	2	3
		1	72	65	63
		2	67	69	64
		3	72	70	70
		4	71	68	67
		5	66	67	65
	Repetition 2	Sample	2	3	1
		1	71	69	66
		2	71	70	66
		3	67	70	69
		4	72	66	65
		5	71	69	64
	Repetition 3	Sample	2	1	3
		1	70	70	49
		2	68	70	64
		3	67	63	64
		4	65	67	69
		5	71	69	67
	Repetition 4	Sample	1	3	2
		1	73	68	66
		2	73	70	62
		3	70	70	67
		4	72	67	68
		5	74	64	69
	Repetition 5	Sample	3	2	1
		1	69	74	64
		2	73	74	64
		3	71	66	62
		4	69	72	67
		5	71	70	64
	Repetition 6	Sample	3	1	2
		1	71	64	65
		2	72	66	65
		3	67	66	62
		4	69	62	66
		5	73	64	68
	Mean	Sample	1	2	3
		1	65.8	67.8	69.6
		2	70.4	66	68.8
		3	67.8	62.6	68.2
		4	66.4	72.4	67.8
		5	70.6	71.2	64.2
		6	64.4	65.2	70.4
		Gen. Mean	0.675667	0.675333	0.681667

## Sheet: 3 September 2022
	#	#	Subjects
	Repetition 1	Sample	1	2	3
		1	71	69	66
		2	70	72	71
		3	72	73	69
		4	68	72	65
		5	72	72	67
	Repetition 2	Sample	2	3	1
		1	67	70	65
		2	71	65	68
		3	67	66	69
		4	75	68	68
		5	68	65	67
	Repetition 3	Sample	2	1	3
		1	75	67	66
		2	70	67	68
		3	70	69	69
		4	69	66	64
		5	67	70	69
	Repetition 4	Sample	1	3	2
		1	74	70	69
		2	72	70	70
		3	76	72	67
		4	72	70	70
		5	69	70	70
	Repetition 5	Sample	3	2	1
		1	77	71	58
		2	75	68	62
		3	71	66	64
		4	70	70	65
		5	70	72	68
	Repetition 6	Sample	3	1	2
		1	70	68	68
		2	71	70	65
		3	71	70	63
		4	74	67	65
		5	72	69	69
	Mean	Sample	1	2	3
		1	67.6	71.6	70.6
		2	69.6	67.4	66.8
		3	67.8	67.2	70.2
		4	69.2	72.6	70.4
		5	72.6	69.4	63.4
		6	68.8	66	71.6
		Gen. Mean	0.692667	0.690333	0.688333

## Sheet: 7 September 2022
	#	#	Subjects
	Repetition 1	Sample	1	2	3
		1	71	72	62
		2	70	63	62
		3	71	68	68
		4	68	70	66
		5	68	69	67
	Repetition 2	Sample	2	3	1
		1	67	66	63
		2	68	67	66
		3	66	71	63
		4	67	67	62
		5	64	66	68
	Repetition 3	Sample	2	1	3
		1	71	67	64
		2	67	64	66
		3	66	66	64
		4	68	71	69
		5	63	65	66
	Repetition 4	Sample	1	3	2
		1	71	67	68
		2	74	67	71
		3	73	68	72
		4	66	64	56
		5	70	61	64
	Repetition 5	Sample	3	2	1
		1	70	69	66
		2	59	66	66
		3	72	66	60
		4	71	63	63
		5	72	63	62
	Repetition 6	Sample	3	1	2
		1	71	62	67
		2	72	66	65
		3	70	64	66
		4	68	66	62
		5	71	67	66
	Mean	Sample	1	2	3
		1	65	68.4	69.6
		2	66.4	64.4	67.4
		3	66.6	65.8	67
		4	66.2	70.8	65.4
		5	68.8	65.4	63.4
		6	65	65.2	70.4
		Gen. Mean	0.663333	0.666667	0.672

## Sheet: 15 September 2022
	#	#	Subjects
	Repetition 1	Sample	1	2	3
		1	72	67	67
		2	73	67	67
		3	72	68	70
		4	65	73	69
		5	70	69	72
	Repetition 2	Sample	2	3	1
		1	66	66	64
		2	64	66	69
		3	66	69	70
		4	67	69	66
		5	69	62	68
	Repetition 3	Sample	2	1	3
		1	70	72	57
		2	75	69	54
		3	60	66	65
		4	68	72	49
		5	57	61	71
	Repetition 4	Sample	1	3	2
		1	64	60	72
		2	75	69	68
		3	73	73	71
		4	62	69	74
		5	75	70	62
	Repetition 5	Sample	3	2	1
		1	71	73	59
		2	73	65	66
		3	73	65	68
		4	73	65	70
		5	71	70	70
	Repetition 6	Sample	3	1	2
		1	70	61	71
		2	73	64	65
		3	71	64	64
		4	72	63	70
		5	67	63	57
	Mean	Sample	1	2	3
		1	69	68.8	70.4
		2	66.4	67.4	66.4
		3	68	59.2	66
		4	69.4	69.8	68.2
		5	72.2	67.6	66.6
		6	63	65.4	70.6
		Gen. Mean	0.68	0.663667	0.680333

## Sheet: 23 September 2022
	#	#	Subjects
	Repetition 1	Sample	1	2	3
		1	66	64	68
		2	68	63	61
		3	66	69	61
		4	67	68	63
		5	75	71	65
	Repetition 2	Sample	2	3	1
		1	70	62	65
		2	66	74	70
		3	61	70	66
		4	70	68	62
		5	64	63	64
	Repetition 3	Sample	2	1	3
		1	72	67	65
		2	62	71	68
		3	68	64	62
		4	67	73	55
		5	73	66	51
	Repetition 4	Sample	1	3	2
		1	71	68	71
		2	68	69	67
		3	74	71	67
		4	73	73	73
		5	70	66	73
	Repetition 5	Sample	3	2	1
		1	70	73	74
		2	70	56	63
		3	72	63	64
		4	66	58	55
		5	71	63	65
	Repetition 6	Sample	3	1	2
		1	64	65	64
		2	68	65	62
		3	70	68	60
		4	69	70	65
		5	72	74	69
	Mean	Sample	1	2	3
		1	63.6	67	68.4
		2	66.2	65.4	67.4
		3	68.2	60.2	68.4
		4	70.2	71.2	69.4
		5	69.8	62.6	64.2
		6	68.4	64	68.6
		Gen. Mean	0.677333	0.650667	0.677333

## Sheet: 1 October 2022
	#	#	Subjects
	Repetition 1	Sample	1	2	3
		1	71	75	68
		2	69	68	70
		3	65	73	62
		4	68	66	64
		5	60	62	65
	Repetition 2	Sample	2	3	1
		1	60	60	53
		2	68	56	58
		3	66	41	65
		4	64	60	53
		5	62	57	65
	Repetition 3	Sample	2	1	3
		1	63	60	62
		2	52	56	64
		3	68	68	52
		4	65	62	53
		5	69	70	64
	Repetition 4	Sample	1	3	2
		1	68	65	71
		2	68	59	68
		3	66	56	63
		4	70	60	63
		5	60	69	61
	Repetition 5	Sample	3	2	1
		1	67	66	60
		2	69	59	59
		3	68	64	55
		4	63	53	55
		5	67	61	60
	Repetition 6	Sample	3	1	2
		1	62	63	71
		2	64	58	52
		3	72	57	65
		4	68	60	67
		5	69	68	69
	Mean	Sample	1	2	3
		1	65.8	68.8	66.6
		2	64	58.8	54.8
		3	63.2	59	63.4
		4	65.2	66.4	61.8
		5	66.8	60.6	57.8
		6	61.2	64.8	67
		Gen. Mean	0.643667	0.630667	0.619

## Sheet: Combined
	Date	S1	S2	S3
	2022-07-30	0.638	0.645333	0.622667
	2022-08-11	0.675667	0.675333	0.681667
	2022-08-23	0.68	0.68	0.68
	2022-09-03	0.69	0.69	0.69
	2022-09-07	0.68	0.663667	0.680333
	2022-09-15	0.663333	0.666667	0.672
	2022-09-23	0.677333	0.650667	0.677333
	2022-10-01	0.643667	0.630667	0.619
