# Supplementary material for: Early detection of Cercospora beticola and powdery mildew diseases in sugar beet using uncrewed aerial vehicle-based remote sensing and machine learning
Source: PeerJ. 2025 Jun 3;13:e19530. doi: 10.7717/peerj.19530 (PMC12143290; doi:10.7717/peerj.19530)
Supplement: Supplemental Information 12 [file peerj-13-19530-s012.xlsx]

## Sheet: 30 July 2023
	#	#	Subjects
	Repetition 1	Sample	1	2	3
		1	71	64	60
		2	88	74	67
		3	66	57	70
		4	70	66	72
		5	73	71	71
	Repetition 2	Sample	2	3	1
		1	59	71	50
		2	59	73	61
		3	56	64	63
		4	58	41	70
		5	72	61	66
	Repetition 3	Sample	2	1	3
		1	64	73	61
		2	55	67	73
		3	58	59	72
		4	61	73	49
		5	53	71	63
	Repetition 4	Sample	1	3	2
		1	58	74	50
		2	58	69	60
		3	62	70	64
		4	64	72	48
		5	64	59	62
	Repetition 5	Sample	3	2	1
		1	70	70	58
		2	61	77	62
		3	68	60	54
		4	64	70	55
		5	56	69	61
	Repetition 6	Sample	3	1	2
		1	53	62	57
		2	58	61	65
		3	58	62	59
		4	51	69	69
		5	45	70	74
	Mean	Sample	1	2	3
		1	68	66.4	73.6
		2	60.8	62	62
		3	68.6	63.6	58.2
		4	56.8	61.2	68.8
		5	63.8	69.2	58
		6	64.8	64.8	53
		Gen. Mean	0.638	0.645333	0.622667

## Sheet: 01 August 2023
	#	#	Subjects
	Repetition 1	Sample	1	2	3
		1	72	65	63
		2	67	69	64
		3	72	70	70
		4	71	68	67
		5	66	67	65
	Repetition 2	Sample	2	3	1
		1	71	69	66
		2	71	70	66
		3	67	70	69
		4	72	66	65
		5	71	69	64
	Repetition 3	Sample	2	1	3
		1	70	70	49
		2	68	70	64
		3	67	63	64
		4	65	67	69
		5	71	69	67
	Repetition 4	Sample	1	3	2
		1	73	68	66
		2	73	70	62
		3	70	70	67
		4	72	67	68
		5	74	64	69
	Repetition 5	Sample	3	2	1
		1	69	74	64
		2	73	74	64
		3	71	66	62
		4	69	72	67
		5	71	70	64
	Repetition 6	Sample	3	1	2
		1	71	64	65
		2	72	66	65
		3	67	66	62
		4	69	62	66
		5	73	64	68
	Mean	Sample	1	2	3
		1	65.8	67.8	69.6
		2	70.4	66	68.8
		3	67.8	62.6	68.2
		4	66.4	72.4	67.8
		5	70.6	71.2	64.2
		6	64.4	65.2	70.4
		Gen. Mean	0.675667	0.675333	0.681667

## Sheet: 08 August 2023
			Subjects
	Repetition 1	Sample	1	2	3
		1	79	81	78
		2	79	80	77
		3	77	80	74
		4	77	75	74
		5	80	80	78
	Repetition 2	Sample	2	3	1
		1	74	79	76
		2	76	68	78
		3	80	75	77
		4	79	71	78
		5	77	76	75
	Repetition 3	Sample	2	1	3
		1	67	77	72
		2	69	77	71
		3	75	80	67
		4	67	77	76
		5	81	72	80
	Repetition 4	Sample	1	3	2
		1	70	80	72
		2	80	75	78
		3	76	76	76
		4	68	64	76
		5	69	76	76
	Repetition 5	Sample	3	2	1
		1	65	73	67
		2	78	78	79
		3	77	79	72
		4	75	79	77
		5	79	76	73
	Repetition 6	Sample	3	1	2
		1	72	78	82
		2	81	77	80
		3	69	81	83
		4	79	81	82
		5	84	82	82
	Mean	Sample	1	2	3
		1	76.2	79.2	78.4
		2	77.2	76.8	73.8
		3	76.6	73.2	71.8
		4	75.6	72.6	74.2
		5	74.8	77	73.6
		6	79.8	81.8	77
		Gen. Mean	0.767	0.767667	0.748

## Sheet: 14 August 2023
			Subjects
	Repetition 1	Sample	1	2	3
		1	80	81	82
		2	76	83	80
		3	79	82	82
		4	78	81	82
		5	80	80	83
	Repetition 2	Sample	2	3	1
		1	79	80	79
		2	79	82	83
		3	84	83	84
		4	83	83	83
		5	80	82	82
	Repetition 3	Sample	2	1	3
		1	72	84	79
		2	71	82	82
		3	79	82	80
		4	78	80	81
		5	77	78	81
	Repetition 4	Sample	1	3	2
		1	75	76	77
		2	72	75	79
		3	71	79	76
		4	74	77	73
		5	74	80	74
	Repetition 5	Sample	3	2	1
		1	72	80	75
		2	73	78	80
		3	73	76	79
		4	80	78	78
		5	77	77	78
	Repetition 6	Sample	3	1	2
		1	77	81	83
		2	77	79	81
		3	80	78	80
		4	79	83	84
		5	76	83	80
	Mean	Sample	1	2	3
		1	81.8	81.4	78.6
		2	81	82.2	82
		3	81.2	80.6	75.4
		4	75.8	73.2	77.4
		5	75	77.8	78
		6	80.8	81.6	77.8
		Gen. Mean	0.792667	0.794667	0.782

## Sheet: 21 August 2023
			Subjects
	Repetition 1	Sample	1	2	3
		1	76	81	78
		2	78	77	78
		3	76	79	78
		4	70	77	81
		5	74	80	80
	Repetition 2	Sample	2	3	1
		1	78	78	78
		2	69	76	78
		3	72	74	78
		4	78	77	73
		5	80	78	78
	Repetition 3	Sample	2	1	3
		1	70	75	74
		2	65	79	74
		3	68	79	74
		4	77	81	77
		5	78	79	78
	Repetition 4	Sample	1	3	2
		1	74	76	78
		2	76	76	76
		3	67	73	74
		4	67	74	69
		5	61	65	73
	Repetition 5	Sample	3	2	1
		1	66	70	71
		2	64	73	73
		3	67	74	74
		4	70	74	76
		5	72	75	74
	Repetition 6	Sample	3	1	2
		1	78	79	80
		2	82	81	80
		3	80	80	81
		4	82	78	83
		5	81	80	83
	Mean	Sample	1	2	3
		1	79	78.8	74.8
		2	75.4	77	76.6
		3	78.6	75.4	71.6
		4	74	69	72.8
		5	67.8	73.2	73.6
		6	79.6	81.4	80.6
		Gen. Mean	0.757333	0.758	0.75

## Sheet: 28 August 2023
			Subjects
	Repetition 1	Sample	1	2	3
		1	76	72	75
		2	71	74	75
		3	72	70	74
		4	71	75	78
		5	74	73	74
	Repetition 2	Sample	2	3	1
		1	71	73	76
		2	73	71	73
		3	75	72	73
		4	74	73	73
		5	72	75	72
	Repetition 3	Sample	2	1	3
		1	67	75	69
		2	64	73	68
		3	66	72	75
		4	71	71	76
		5	75	74	75
	Repetition 4	Sample	1	3	2
		1	72	63	78
		2	79	76	78
		3	73	76	74
		4	71	74	70
		5	67	76	76
	Repetition 5	Sample	3	2	1
		1	67	72	71
		2	68	70	63
		3	72	79	69
		4	73	77	74
		5	78	76	77
	Repetition 6	Sample	3	1	2
		1	76	79	79
		2	78	80	79
		3	77	78	77
		4	80	77	68
		5	83	80	79
	Mean	Sample	1	2	3
		1	75.2	72.8	72.8
		2	73	73.4	72.8
		3	73	72.6	68.6
		4	75.2	72.4	73
		5	71.6	74.8	70.8
		6	78.8	76.4	78.8
		Gen. Mean	0.744667	0.737333	0.728

## Sheet: 04 September 2023
			Subjects
	Repetition 1	Sample	1	2	3
		1	68	65	64
		2	67	64	63
		3	63	65	62
		4	66	64	64
		5	63	66	58
	Repetition 2	Sample	2	3	1
		1	65	61	71
		2	63	65	63
		3	65	67	64
		4	62	65	65
		5	59	68	65
	Repetition 3	Sample	2	1	3
		1	63	68	59
		2	64	65	57
		3	64	66	65
		4	68	59	67
		5	65	61	68
	Repetition 4	Sample	1	3	2
		1	72	71	64
		2	73	69	70
		3	69	70	70
		4	69	64	71
		5	66	68	74
	Repetition 5	Sample	3	2	1
		1	69	72	72
		2	68	68	66
		3	72	73	75
		4	70	73	72
		5	71	73	72
	Repetition 6	Sample	3	1	2
		1	70	75	70
		2	70	73	67
		3	69	72	75
		4	73	72	69
		5	64	71	69
	Mean	Sample	1	2	3
		1	62.2	64.8	65.4
		2	62.8	65.6	65.2
		3	63.8	63.2	64.8
		4	69.8	69.8	68.4
		5	70	71.8	71.4
		6	72.6	70	69.2
		Gen. Mean	0.668667	0.675333	0.674

## Sheet: 11 September 2023
			Subjects
	Repetition 1	Sample	1	2	3
		1	63	65	67
		2	59	66	65
		3	64	67	64
		4	62	67	68
		5	69	67	61
	Repetition 2	Sample	2	3	1
		1	70	63	66
		2	67	62	64
		3	69	65	58
		4	64	66	64
		5	70	68	69
	Repetition 3	Sample	2	1	3
		1	71	66	61
		2	69	70	67
		3	70	62	70
		4	72	68	67
		5	74	66	71
	Repetition 4	Sample	1	3	2
		1	71	69	72
		2	70	71	76
		3	68	68	75
		4	67	73	68
		5	61	75	77
	Repetition 5	Sample	3	2	1
		1	73	70	70
		2	74	69	72
		3	69	70	74
		4	74	73	71
		5	73	74	71
	Repetition 6	Sample	3	1	2
		1	72	71	76
		2	77	73	74
		3	74	72	76
		4	76	71	72
		5	75	67	75
	Mean	Sample	1	2	3
		1	65	66.4	63.4
		2	68	64.2	64.8
		3	66.4	67.2	71.2
		4	73.6	67.4	71.2
		5	72.6	71.2	71.6
		6	70.8	74.6	74.8
		Gen. Mean	0.694	0.685	0.695

## Sheet: 18 September 2023
			Subjects
	Repetition 1	Sample	1	2	3
		1	65	71	72
		2	62	79	70
		3	60	68	68
		4	65	72	72
		5	62	71	74
	Repetition 2	Sample	2	3	1
		1	68	71	65
		2	69	73	65
		3	71	71	59
		4	71	68	62
		5	65	73	65
	Repetition 3	Sample	2	1	3
		1	74	66	68
		2	76	64	72
		3	66	61	66
		4	68	70	74
		5	71	64	70
	Repetition 4	Sample	1	3	2
		1	68	75	74
		2	70	72	78
		3	69	76	72
		4	70	73	79
		5	67	74	79
	Repetition 5	Sample	3	2	1
		1	71	75	72
		2	73	75	67
		3	76	74	67
		4	77	77	56
		5	72	78	67
	Repetition 6	Sample	3	1	2
		1	76	74	78
		2	79	72	76
		3	77	71	79
		4	78	72	77
		5	76	72	77
	Mean	Sample	1	2	3
		1	71.2	72.2	62.8
		2	68.8	63.2	71.2
		3	65	70	71
		4	76.4	68.8	74
		5	73.8	75.8	65.8
		6	72.2	77.4	77.2
		Gen. Mean	0.712333	0.712333	0.703333

## Sheet: 25September 2023
			Subjects
	Repetition 1	Sample	1	2	3
		1	61	60	64
		2	61	55	58
		3	57	60	58
		4	60	61	55
		5	59	60	58
	Repetition 2	Sample	2	3	1
		1	63	60	60
		2	62	59	59
		3	63	64	60
		4	67	64	56
		5	59	69	60
	Repetition 3	Sample	2	1	3
		1	50	52	59
		2	60	58	62
		3	66	66	60
		4	59	54	57
		5	65	62	61
	Repetition 4	Sample	1	3	2
		1	57	67	63
		2	68	69	71
		3	62	72	66
		4	62	68	63
		5	57	61	68
	Repetition 5	Sample	3	2	1
		1	66	66	65
		2	65	66	66
		3	69	67	57
		4	70	68	62
		5	70	70	59
	Repetition 6	Sample	3	1	2
		1	63	69	68
		2	67	65	71
		3	70	66	72
		4	68	64	72
		5	69	66	69
	Mean	Sample	1	2	3
		1	58.6	59.2	59.6
		2	62.8	59	63.2
		3	58.4	59.8	60
		4	66.2	61.2	67.4
		5	68	67.4	61.8
		6	66	70.4	67.4
		Gen. Mean	0.633333	0.628333	0.632333

[truncated: 1 more sheets: Combined]
