# Supplementary material for: Early detection of Cercospora beticola and powdery mildew diseases in sugar beet using uncrewed aerial vehicle-based remote sensing and machine learning
Source: PeerJ. 2025 Jun 3;13:e19530. doi: 10.7717/peerj.19530 (PMC12143290; doi:10.7717/peerj.19530)
Supplement: Supplemental Information 13 [file peerj-13-19530-s013.xlsx]

## Sheet: Chart
Date/Time	Average air temperature [°C]	Average relative humidity [%]	Total precipitation [mm]	Wind speed [km/h]	Leaf wetness [saat]
2023-09-09	19.14	76.42	0	0	0
2023-09-08	18.83	89.78	4.2	0	6.25
2023-09-07	21.55	78	0	0	8.25
2023-09-06	21.98	77.62	0	0	8.75
2023-09-05	19.78	75.08	0	0	4.25
2023-09-04	18.45	78.32	0	0	1.25
2023-09-03	20.43	76.68	0	0	0
2023-09-02	21.24	73.03	0	0	4.5
2023-09-01	21.94	52.53	0	0	0
2023-08-31	23.93	44.27	0	0	0
2023-08-30	24.1	41.39	0	0	0
2023-08-29	21.93	60.87	0	0	6.25
2023-08-28	21.51	72.11	0	0	5
2023-08-27	23	50.79	0	0	0
2023-08-26	23.35	49.91	0	0	0
2023-08-25	23.73	52.5	0	0	0
2023-08-24	24.31	47.65	0	0	0
2023-08-23	24.64	42.61	0	0	0
2023-08-22	24.54	45.67	0	0	0
2023-08-21	23.96	45.97	0	0	0
2023-08-20	24.3	48.69	0	0	0
2023-08-19	27.21	43.24	0	0	0
2023-08-18	28.12	48.99	0	0	0
2023-08-17	27.6	64.78	0	0	5.25
2023-08-16	27.71	52.87	0	0	0
2023-08-15	28.6	49.22	0	1.08	1
2023-08-14	26.12	66.09	0.2	0	5
2023-08-13	23.93	72.05	0	0	3.25
2023-08-12	21.18	75.21	0	0	1.75
2023-08-11	21	77.26	0	0	0
2023-08-10	21.31	81.73	0	0	0
2023-08-09	20.83	78	0	0	0
2023-08-08	22.75	68.19	0	0	0
2023-08-07	24.14	55.34	0	0	0
2023-08-06	27.73	41.39	0	0.36	0
2023-08-05	26.94	41.63	0	2.88	0
2023-08-04	25.56	44.38	0	0	0
2023-08-03	24.22	48.4	0	0	0
2023-08-02	23.02	62.19	0	0	1
2023-08-01	21.68	67.72	0	0	0
2023-07-31	20.82	61.9	0	0	0
2023-07-30	20.39	59.29	0	3.96	0
2023-07-29	20.16	54.91	0	2.16	0
2023-07-28	18.73	59.62	0	0	1.75
2023-07-27	23.91	49.42	0	0.72	0
2023-07-26	25.46	35.39	0	1.08	0
2023-07-25	21.97	47.9	0	0	0

## Sheet: Chart2
Date/Time	Average air temperature [°C]	Average relative humidity [%]	Total precipitation [mm]	Leaf wetness [saat]	NDVI2	GS-S1	GS-S2	GS-S3	MS1	MS2	MS3
2023-07-25	21.97	47.9	0	0	48.11	66	66	66	17.7617	17.7567	20.095
2023-07-26	25.46	35.39	0	0
2023-07-27	23.91	49.42	0	0
2023-07-28	18.73	59.62	0	1.75	44.12
2023-07-29	20.16	54.91	0	0
2023-07-30	20.39	59.29	0	0
2023-07-31	20.82	61.9	0	0
2023-08-01	21.68	67.72	0	0		68	68	68	17.7617	17.7567	20.095
2023-08-02	23.02	62.19	0	1	68.13
2023-08-03	24.22	48.4	0	0
2023-08-04	25.56	44.38	0	0
2023-08-05	26.94	41.63	0	0
2023-08-06	27.73	41.39	0	0
2023-08-07	24.14	55.34	0	0	57.69
2023-08-08	22.75	68.19	0	0		77	77	75	20.2083	19.785	23.1767
2023-08-09	20.83	78	0	0
2023-08-10	21.31	81.73	0	0
2023-08-11	21	77.26	0	0
2023-08-12	21.18	75.21	0	1.75	45.05
2023-08-13	23.93	72.05	0	3.25
2023-08-14	26.12	66.09	0.2	5		79	79	78	23.9767	21.01	24.825
2023-08-15	28.6	49.22	0	1
2023-08-16	27.71	52.87	0	0
2023-08-17	27.6	64.78	0	5.25	65.4
2023-08-18	28.12	48.99	0	0
2023-08-19	27.21	43.24	0	0
2023-08-20	24.3	48.69	0	0
2023-08-21	23.96	45.97	0	0		76	76	75	18.8033	17.7433	20.2417
2023-08-22	24.54	45.67	0	0	65.76
2023-08-23	24.64	42.61	0	0
2023-08-24	24.31	47.65	0	0
2023-08-25	23.73	52.5	0	0
2023-08-26	23.35	49.91	0	0
2023-08-27	23	50.79	0	0	62.77
2023-08-28	21.51	72.11	0	5		74	74	73	17.9117	17.495	19.445
2023-08-29	21.93	60.87	0	6.25
2023-08-30	24.1	41.39	0	0
2023-08-31	23.93	44.27	0	0
2023-09-01	21.94	52.53	0	0	53.58
2023-09-02	21.24	73.03	0	4.5
2023-09-03	19.14	76.42	0	0
2023-09-04	18.83	89.78	4.2	6.25		67	68	67	17.9117	17.495	19.445
2023-09-05	21.55	78	0	8.25
2023-09-06	21.98	77.62	0	8.75	38.26
2023-09-07	19.78	75.08	0	4.25
2023-09-08	18.45	78.32	0	1.25
2023-09-09	20.43	76.68	0	0	10.53	69	69	70	17.9917	21.6667	19.65
			4.4	63.5
		2023-07-20	4.4	41
