# Supplementary material for: Early detection of Cercospora beticola and powdery mildew diseases in sugar beet using uncrewed aerial vehicle-based remote sensing and machine learning
Source: PeerJ. 2025 Jun 3;13:e19530. doi: 10.7717/peerj.19530 (PMC12143290; doi:10.7717/peerj.19530)
Supplement: Supplemental Information 14 [file peerj-13-19530-s014.xlsx]

## Sheet: MS
	2023-08-01				2023-08-08				2023-08-14				2023-08-21				2023-08-28				2023-09-04				2023-09-11				2023-09-18				2023-09-25				2023-10-06
		Min	Max			Min	Max			Min	Max			Min	Max			Min	Max			Min	Max			Min	Max			Min	Max			Min	Max			Min	Max
Green		0.88	0.96			0.89	0.97			0.87	0.96			0.87	0.97			0.88	0.99			0.86	0.94			0.87	0.96			0.83	0.97			0.8	0.95			0.8	0.96
Yellow		0.81	0.88			0.82	0.89			0.79	0.87			0.77	0.87			0.79	0.88			0.8	0.86			0.81	0.87			0.72	0.83			0.71	0.8			0.67	0.8
Orange1		0.73	0.81			0.75	0.82			0.7	0.79			0.68	0.77			0.69	0.79			0.72	0.8			0.74	0.81			0.61	0.72			0.59	0.71			0.53	0.67
Orange2		0.65	0.73			0.67	0.75			0.62	0.7			0.57	0.68			0.59	0.69			0.63	0.72			0.63	0.74			0.49	0.61			0.46	0.59			0.39	0.53
Red		0.56	0.65			0.58	0.67			0.52	0.62			0.46	0.57			0.48	0.59			0.5	0.63			0.42	0.63			0.37	0.49			0.28	0.46			0.23	0.39
	T1P1	T1P2	T1P3		T1P1	T1P2	T1P3		T1P1	T1P2	T1P3		T1P1	T1P2	T1P3		T1P1	T1P2	T1P3	S2.-S3, 1. Spray (31.08.2023)	T1P1	T1P2	T1P3		T1P1	T1P2	T1P3		T1P1	T1P2	T1P3	S2 - S3, 2. Spray (18.09.2023)	T1P1	T1P2	T1P3	S2 - S3, 3. Spray (30.09.2023)	T1P1	T1P2	T1P3
Green	18.45	21.95	28.18		18.8	24.89	30.95		29.74	29.24	32.58		26.39	22.61	27.45		19.35	20.38	24.28		10.36	11.04	10.76		17.64	17.17	14.09		16.66	23.26	23.61		6.24	9.57	10.71		8.19	12.86	16.57
Yellow	43.67	34.98	44.38		42.75	32.04	33.58		47.86	34.23	38.06		56.97	39.04	45.3		42.47	34.98	45.28		53.16	54.56	52.95		38.84	44.9	42.46		44.47	46.61	45.07		42.47	48.87	44.63		38.02	44.74	42.53
Orange1	28.97	31.92	23.62		29.01	28.99	26.95		18.62	26	24.78		14.22	31.8	24.37		29.25	31.92	25.37		29.33	27.78	28.6		31.4	28.79	30.68		27.69	22.7	22.41		34.48	30.9	29.82		36.03	30.36	27.51
Orange2	5.81	10.21	3.27		6.45	12.79	7.76		2.82	9.82	4.22		1.7	6.02	2.46		5.83	10.21	3.27		6.02	5.71	6.43		9.57	7.13	9.54		8.49	5.83	6.7		10.11	7.94	10.66		13.48	9.67	10.2
Red	3.1	0.95	0.56		2.99	1.28	0.77		0.96	0.7	0.36		0.73	0.53	0.42		3.1	2.51	1.8		1.13	0.91	1.27		2.55	2.01	3.22		2.7	1.6	2.2		6.71	2.72	4.18		4.28	2.37	3.19
	T2P2	T2P3	T2P1		T2P2	T2P3	T2P1		T2P2	T2P3	T2P1		T2P2	T2P3	T2P1		T2P2	T2P3	T2P1		T2P2	T2P3	T2P1		T2P2	T2P3	T2P1		T2P2	T2P3	T2P1		T2P2	T2P3	T2P1		T2P2	T2P3	T2P1
Green	16.69	18.6	19.48		18.46	22.22	26.08		32.34	32.14	33.69		19.46	21.04	20.88		16.69	18.6	19.48		6.4	8.11	7.67		19.78	14.46	10.5		19.75	22.44	14.4		16.68	13.1	8.23		20.66	16.15	10.71
Yellow	40.58	42.95	40.11		41.6	41.7	37.72		48.26	34.85	38.35		45.82	48.93	46.7		40.58	42.95	40.11		35.08	44.28	40.31		40.75	41.99	36.84		47.94	44.07	41.58		49.37	47.97	40.47		47.39	44.66	38.06
Orange1	29.29	28.85	29.07		29.41	27.46	25.89		16.51	25.08	23.42		24.51	24.08	25.03		29.29	28.85	29.07		33.86	32.66	32.23		27.26	31.55	35.16		23.31	24.06	28.61		23.66	28.27	33.62		22.88	28.42	31.96
Orange2	7.68	7.08	29.07		7.08	6.87	7.54		2.17	7.4	3.59		7.11	4.64	5.56		7.68	7.08	29.07		16.13	11.46	13.94		8.92	9.25	13.07		6.84	7.38	11.63		7.17	8.31	12.07		7.01	8.66	14.31
Red	5.77	2.51	3.74		3.46	1.75	2.77		0.72	0.53	0.45		3.1	1.32	1.83		5.77	2.51	3.74		8.53	3.49	5.86		3.29	2.75	4.44		2.17	2.05	3.78		3.11	2.35	5.6		2.05	2.12	4.95
	T3P2	T3P1	T3P3		T3P2	T3P1	T3P3		T3P2	T3P1	T3P3		T3P2	T3P1	T3P3		T3P2	T3P1	T3P3		T3P2	T3P1	T3P3		T3P2	T3P1	T3P3		T3P2	T3P1	T3P3		T3P2	T3P1	T3P3		T3P2	T3P1	T3P3
Green	13.45	15.54	16.74		13.91	18.87	22.6		19.48	28.38	27.62		17.5	20.21	22.75		13.45	15.54	16.74		15.35	14.54	18.92		15.34	13.93	13.61		11.43	12.87	16.37		8.62	8.49	10.87		11.26	9.68	13.56
Yellow	38.9	44.52	41.99		38.92	41.83	40.73		47.55	39.13	48.68		51.83	45.88	53.25		38.9	44.52	41.99		51.84	60.83	60.01		39.3	43.52	43.38		39.01	40.54	40.29		33.91	41.68	39.28		37.4	38.47	39.14
Orange1	30.81	30.38	29.27		30.29	29.55	26.35		25.77	26.99	20.38		23.29	28.03	19.3		30.81	30.38	29.27		23.84	20.21	16.99		27.86	30.75	28.44		28.34	29.89	27.05		26.25	29.23	27.46		28.15	32.24	28.43
Orange2	10.25	7.13	8.1		10.18	7.57	7.36		5.33	4.94	2.74		5.42	4.92	3.59		10.25	7.13	8.1		6.61	3.52	2.98		11.59	8.78	10.04		13.81	11.98	11.23		13.66	12.51	13.04		14.44	14.28	13.01
Red	6.58	2.43	3.9		6.7	2.18	2.96		1.87	0.57	0.58		1.97	0.95	1.11		6.58	2.43	3.9		2.36	0.9	1.1		5.91	3.02	4.53		7.41	4.73	5.06		17.55	8.1	9.35		8.74	5.33	5.85
	T4P1	T4P3	T4P2		T4P1	T4P3	T4P2		T4P1	T4P3	T4P2		T4P1	T4P3	T4P2		T4P1	T4P3	T4P2		T4P1	T4P3	T4P2		T4P1	T4P3	T4P2		T4P1	T4P3	T4P2		T4P1	T4P3	T4P2		T4P1	T4P3	T4P2
Green	12.55	17.33	16.73		11.23	17.24	20.79		8.52	12.6	9.63		6.53	7.22	7.99		12.55	17.33	16.73		16.02	22.31	30.92		22.42	25.31	24.98		20.47	28.55	27.15		14.77	19.52	18.14		19.04	27.07	24.66
Yellow	39.63	47.09	45.27		36.41	42.09	41.91		35.43	38.09	37.42		35.82	40.24	42		39.63	47.09	45.27		47.16	54.31	53.39		47.25	53.29	56.2		49.09	46.58	48.18		46.13	52.31	51.69		45.18	48.4	46.08
Orange1	31.67	28.06	27.32		32.41	30.56	26.51		35.62	34.57	34.57		34.83	35.39	33.08		31.67	28.06	27.32		22.22	17.67	11.77		21.38	16.61	14.87		21.61	18.57	18.44		21.92	20.34	21.79		22.22	17.41	20.61
Orange2	8.88	5.26	5.2		10.59	7.45	6.99		13.7	10.65	12.71		14.59	11.76	11.57		8.88	5.26	5.2		9.37	4.16	2.81		5.84	3.51	2.96		6.06	4.7	4.7		8.21	5.07	5.85		8.82	5.21	6.48
Red	7.27	2.26	4.49		9.37	2.66	3.8		6.73	4.08	5.67		8.22	5.39	5.37		7.27	2.26	4.49		5.23	1.56	1.12		3.11	1.27	0.99		2.77	1.59	1.53		8.98	2.76	2.53		4.74	1.92	2.18
	T5P3	T5P2	T5P1		T5P3	T5P2	T5P1		T5P3	T5P2	T5P1		T5P3	T5P2	T5P1		T5P3	T5P2	T5P1		T5P3	T5P2	T5P1		T5P3	T5P2	T5P1		T5P3	T5P2	T5P1		T5P3	T5P2	T5P1		T5P3	T5P2	T5P1
Green	10.65	13.27	17.52		12.86	14.9	22.34		9.82	12.46	13.35		8.35	10.33	13.01		10.65	13.27	17.52		20.05	20.25	24.58		26.04	29.9	19.98		22.31	32.67	26.12		21.13	25.37	18.65		27.64	30.63	18.25
Yellow	29.68	46.65	47.3		39.64	43.17	43.19		38.73	41.36	42.66		40.47	45.97	48.95		29.68	46.65	47.3		56.48	61	46.77		54.07	53.77	56.22		46.96	49.92	50.5		20.33	54.88	52.06		48.77	50.53	44.6
Orange1	31.85	30.39	26.5		32.54	30.9	26.18		34.59	32.86	31.32		34.26	31.46	28.53		31.85	30.39	26.5		18.66	15.79	24.21		15.27	14.12	20.14		21.35	13.78	18.36		18.54	15.13	21.3		16.29	14.29	25.91
Orange2	9.38	6.33	5.43		9.74	7.5	6.17		11.7	9.53	9.13		11.43	8.75	6.86		9.38	6.33	5.43		3.75	2.34	3.89		3.21	1.82	2.91		6.5	2.65	3.94		5.91	3.28	5.91		5.15	3.39	8.53
Red	8.43	3.35	3.25		5.39	3.53	2.12		5.15	3.78	3.54		5.49	3.49	2.64		8.43	3.35	3.25		1.06	0.61	0.54		1.41	0.4	0.75		2.88	0.98	1.09		4.1	1.34	2.07		2.16	1.17	2.72
	T6P3	T6P1	T6P2		T6P3	T6P1	T6P2		T6P3	T6P1	T6P2		T6P3	T6P1	T6P2		T6P3	T6P1	T6P2		T6P3	T6P1	T6P2		T6P3	T6P1	T6P2		T6P3	T6P1	T6P2		T6P3	T6P1	T6P2		T6P3	T6P1	T6P2
Green	29.07	23.03	24.45		33.19	23.93	25.76		34.19	30.18	22.91		34.64	25.8	28.57		29.07	23.03	24.45		18.42	15.64	23.8		24.39	23.48	22.83		37.45	26.94	39.67		26.97	17.54	18.72		33.06	15.91	28.06
Yellow	47.05	40.49	48.2		41.24	45.63	45.35		45.98	46.48	48.13		53.24	58.15	56.82		47.05	40.49	48.2		53.29	55.77	56.91		34.41	43.02	36.53		42.79	48.32	44.91		41.16	54.95	55.76		43.29	49.26	50.29
Orange1	20.2	30.42	23.49		20.91	25.55	24.08		16.99	19.73	23.93		10.34	14.66	12.38		20.2	30.42	23.49		24.2	25.6	16.57		28.14	28.82	30.05		15.32	20.31	12.57		24.62	21.41	20.19		18.28	25.87	16.24
Orange2	2.68	5.4	3.16		3.72	3.97	3.65		2.29	2.82	3.76		1.24	1.09	1.66		2.68	5.4	3.16		3.66	2.68	2.26		11.72	4.33	9.77		3.47	3.71	2.19		6.21	4.65	4.07		4.46	7.17	4.17
Red	1.01	0.67	0.7		0.94	0.92	1.16		0.54	0.78	1.27		0.53	0.3	0.56		1.01	0.67	0.7		0.43	0.3	0.46		1.35	0.34	0.82		0.97	0.72	0.65		1.05	1.46	1.25		0.91	1.78	1.24
	2023-08-01				2023-08-08				2023-08-14				2023-08-21				2023-08-28				2023-09-04				2023-09-11				2023-09-18				2023-09-25				2023-10-06
	1	2	3		1	2	3		1	2	3		1	2	3		1	2	3		1	2	3		1	2	3		1	2	3		1	2	3		1	2	3
Green	17.7617	17.7567	20.095		20.2083	19.785	23.1767		23.9767	21.01	24.825		18.8033	17.7433	20.2417		17.9117	17.495	19.445		14.8017	17.96	16.4283		17.9917	21.6667	19.65		19.5767	25.655	25.1217		12.32	16.1833	17.05		13.63	21.355	22.3417
Yellow	42.62	42.43	42.19		41.255	40.4983	39.83		41.6517	42.825	40.7317		48.745	46.9133	46.905		42.42	42.43	42.34		50.6667	52.13	53.5533		44.2817	45.2417	44.9333		45.75	46.095	44.2933		46.2933	49.08	40.9467		42.265	46.0717	44.465
Orange1	29.5017	28.87	26.975		28.0983	28.3633	27.4617		25.95	26.6067	26.065		24.2167	26.0867	24.6233		29.5483	28.87	27.2667		25.6333	21.6017	23.13		27.9417	23.825	25.115		24.4117	19.8567	21.46		26.9933	22.9867	24.8417		29.0383	22.0883	22.7233
Orange2	10.2867	7.13833	5.96167		7.04833	8.03167	7.15		6.16667	7.22	6.5		5.78667	6.755	5.85333		10.29	7.13833	5.96167		6.57	5.97667	5.40667		7.41667	7.03167	7.87833		7.635	6.00333	6.66333		8.91	6.995	8.2		11.0983	7.52667	7.78167
Red	3.41	3.64	3.11167		3.39167	3.32167	2.41167		2.17167	2.335	1.87333		2.445	2.50333	2.37667		3.41	3.9	3.31833		2.32667	2.33167	1.485		2.36833	2.23667	2.42167		2.63167	2.39	2.45833		5.48667	4.75	3.965		3.96667	2.95833	2.69167

## Sheet: MS_Chart
		1	2	3				2023-08-01	2023-08-08	2023-08-14	2023-08-21	2023-08-28	2023-09-04	2023-09-11	2023-09-18	2023-09-25	2023-10-06
2023-08-01	Green	17.7617	17.7567	20.095		Green	1	17.7617	20.2083	23.9767	18.8033	17.9117	14.8017	17.9917	19.5767	12.32	13.63
	Yellow	42.62	42.43	42.19			2	17.7567	19.785	21.01	17.7433	17.495	17.96	21.6667	25.655	16.1833	21.355
	Orange1	29.5017	28.87	26.975			3	20.095	23.1767	24.825	20.2417	19.445	16.4283	19.65	25.1217	17.05	22.3417
	Orange2	10.2867	7.13833	5.96167
	Red	3.41	3.64	3.11167
2023-08-08	Green	20.2083	19.785	23.1767
	Yellow	41.255	40.4983	39.83
	Orange1	28.0983	28.3633	27.4617
	Orange2	7.04833	8.03167	7.15
	Red	3.39167	3.32167	2.41167
2023-08-14	Green	23.9767	21.01	24.825
	Yellow	41.6517	42.825	40.7317
	Orange1	25.95	26.6067	26.065
	Orange2	6.16667	7.22	6.5
	Red	2.17167	2.335	1.87333
2023-08-21	Green	18.8033	17.7433	20.2417
	Yellow	48.745	46.9133	46.905
	Orange1	24.2167	26.0867	24.6233
	Orange2	5.78667	6.755	5.85333
	Red	2.445	2.50333	2.37667
2023-08-28	Green	17.9117	17.495	19.445
	Yellow	47.42	45.43	42.34				2023-08-01	2023-08-08	2023-08-14	2023-08-21	2023-08-28	2023-09-04	2023-09-11	2023-09-18	2023-09-25	2023-10-06
	Orange1	30.55	29.87	28.27		Yellow	1	42.62	41.255	41.6517	48.745	47.42	50.6667	44.2817	45.75	46.2933	42.265
	Orange2	5.29	4.14	5.96167			2	42.43	40.4983	42.825	46.9133	45.43	52.13	45.2417	46.095	49.08	46.0717
	Red	2.41	2.9	2.32			3	42.19	39.83	40.7317	46.905	42.34	53.5533	44.9333	44.2933	40.9467	44.465
2023-09-04	Green	14.8017	17.96	16.4283
	Yellow	50.6667	52.13	53.5533
	Orange1	25.6333	21.6017	23.13
	Orange2	6.57	5.97667	5.40667
	Red	2.32667	2.33167	1.485
2023-09-11	Green	17.9917	21.6667	19.65
	Yellow	44.2817	45.2417	44.9333
	Orange1	27.9417	23.825	25.115
	Orange2	7.41667	7.03167	7.87833
	Red	2.36833	2.23667	2.42167
2023-09-18	Green	19.5767	25.655	25.1217
	Yellow	45.75	46.095	44.2933
	Orange1	24.4117	19.8567	21.46
	Orange2	7.635	6.00333	6.66333
	Red	2.63167	2.39	2.45833
2023-09-25	Green	12.32	16.1833	17.05
	Yellow	46.2933	49.08	40.9467
	Orange1	26.9933	22.9867	24.8417
	Orange2	8.91	6.995	8.2				2023-08-01	2023-08-08	2023-08-14	2023-08-21	2023-08-28	2023-09-04	2023-09-11	2023-09-18	2023-09-25	2023-10-06
	Red	5.48667	4.75	3.965		Orange1	1	29.5017	28.0983	25.95	24.2167	30.55	25.6333	27.9417	24.4117	26.9933	29.0383
2023-10-06	Green	13.63	21.355	22.3417			2	28.87	28.3633	26.6067	26.0867	29.87	21.6017	23.825	19.8567	22.9867	22.0883
	Yellow	42.265	46.0717	44.465			3	26.975	27.4617	26.065	24.6233	28.27	23.13	25.115	21.46	24.8417	22.7233
	Orange1	29.0383	22.0883	22.7233
	Orange2	11.0983	7.52667	7.78167
	Red	3.96667	2.95833	2.69167
	Green
	Yellow
	Orange1
	Orange2
	Red
	Green
	Yellow
	Orange1
	Orange2
	Red
	Green
	Yellow
	Orange1
	Orange2
	Red
								2023-08-01	2023-08-08	2023-08-14	2023-08-21	2023-08-28	2023-09-04	2023-09-11	2023-09-18	2023-09-25	2023-10-06
						Orange2	1	10.2867	7.04833	6.16667	5.78667	5.29	6.57	7.41667	7.635	8.91	11.0983
							2	7.13833	8.03167	7.22	6.755	4.14	5.97667	7.03167	6.00333	6.995	7.52667
							3	5.96167	7.15	6.5	5.85333	5.96167	5.40667	7.87833	6.66333	8.2	7.78167
								2023-08-01	2023-08-08	2023-08-14	2023-08-21	2023-08-28	2023-09-04	2023-09-11	2023-09-18	2023-09-25	2023-10-06
						Red	1	3.41	3.39167	2.17167	2.445	2.41	2.32667	2.36833	2.63167	5.48667	3.96667
							2	3.64	3.32167	2.335	2.50333	2.9	2.33167	2.23667	2.39	4.75	2.95833
							3	3.11167	2.41167	1.87333	2.37667	2.32	1.485	2.42167	2.45833	3.965	2.69167
