# Supplementary material for: Early detection of Cercospora beticola and powdery mildew diseases in sugar beet using uncrewed aerial vehicle-based remote sensing and machine learning
Source: PeerJ. 2025 Jun 3;13:e19530. doi: 10.7717/peerj.19530 (PMC12143290; doi:10.7717/peerj.19530)
Supplement: Supplemental Information 23 [file peerj-13-19530-s023.xlsx]

## Sheet: 2022 CLS
	CLS
												CLS																		CLS
	Serial Number	Subject Number	Digestion	Sodium	Potassium	Harmfull Nitrogen	Beet Yield	Refined Digestion	Refined Beet Yield	Dry Matter		Digestion							Mean		Beet Yield 10 M2							Mean		Sodium							Mean		Potassium							Mean		Refined Digestion
	1	1	9.5	2.73	5.35	4.1	112.7	6.05316	6.82191	12.85		1	9.5	9.49	9.45	9.5	9.47	9.63	9.50667	0.00402667	1	112.7	113.1	103.1	119.2	97.8	120.5	111.067	80.2827	1	2.73	3.23	2.38	3.28	3.22	2.96	2.825	0.126387	1	5.35	4.46	5.4	4.19	4.73	5.63	5.21	0.33808	1	6.05316
	2	2	10.65	2.83	5.72	3.98	136	7.05323	9.59239	13.58		2	10.65	10.72	9.39	9.48	10.4	9.75	10.065	0.35611	2	136	126.9	117.2	109.8	140.9	130.5	126.883	135.654	2	2.83	3.15	2.88	3.22	2.76	2.8	2.915	0.03804	2	5.72	4.42	5.19	5.3	5.85	5.3	5.1575	0.253067	2	7.05323
	3	3	10.25	3.1	4.3	3.24	127.6	7.11724	9.0816	13.03		3	10.25	9.34	9.25	9.31	9.87	9.68	9.61667	0.154867	3	127.6	143.4	119.5	128	123.9	123.4	127.633	69.3467	3	3.1	3.54	3.16	3.22	3.25	3.08	3.22	0.02815	3	4.3	4.46	4.62	4.95	4.45	6.03	4.8525	0.411177	3	7.11724
	4	2	10.72	3.15	4.42	3.1	126.9	7.54209	9.57091	13.44									9.72944									121.861									2.98667									5.07333
	5	3	9.34	3.54	4.46	3.98	143.4	5.93188	8.50632	12.29
	6	1	9.49	3.23	4.46	4.59	113.1	6.13087	6.93401	12.72
	7	2	9.39	2.88	5.19	4.07	117.2	5.94941	6.97271	12.7		Refined Digestion							Mean		Refined Beet Yield							Mean		Harmfull Nitrogen									Dry Matter
	8	1	9.45	2.38	5.4	4.73	103.1	6.04684	6.23429	12.64		1	6.05316	6.13087	6.04684	6.33759	6.06399	6.00635	6.10647	0.0144476	1	6.82191	6.93401	6.23429	7.55441	5.93058	7.23765	6.78548	0.370751	1	4.1	4.59	4.73	3.3	4.14	4.12	4.385	0.250987	1	12.85	12.72	12.64	12.88	12.07	12.61	12.705	0.0866167
	9	3	9.25	3.16	4.62	4.01	119.5	5.91452	7.06785	11.3		2	7.05323	7.54209	5.94941	5.98188	6.74035	6.24836	6.58589	0.408089	2	9.59239	9.57091	6.97271	6.5681	9.49715	8.15411	8.39256	1.88994	2	3.98	3.1	4.07	3.04	4.43	4.61	3.94	0.439017	2	13.58	13.44	12.7	11.94	13.82	12.82	13.135	0.48668
	10	1	9.5	3.28	4.19	3.3	119.2	6.33759	7.55441	12.88		3	7.11724	5.93188	5.91452	5.80597	6.57982	5.86107	6.20175	0.281819	3	9.0816	8.50632	7.06785	7.43164	8.1524	7.23256	7.91206	0.636786	3	3.24	3.98	4.01	4.38	3.82	4.3	3.8825	0.16655	3	13.03	12.29	11.3	12.4	12.6	12.75	12.3425	0.35627
	11	3	9.31	3.22	4.95	4.38	128	5.80597	7.43164	12.4									6.29803									7.6967									4.06917									12.7275
	12	2	9.48	3.22	5.3	3.04	109.8	5.98188	6.5681	11.94
	13	3	9.87	3.25	4.45	3.82	123.9	6.57982	8.1524	12.6
	14	2	10.4	2.76	5.85	4.43	140.9	6.74035	9.49715	13.82		Sodium							Mean		Potassium							Mean			ONLY VALUES WERE COPIED TO BE USED WHEN PRINTING
	15	1	9.47	3.22	4.73	4.14	97.8	6.06399	5.93058	12.07		1	2.73	3.23	2.38	3.28	3.22	2.96	2.96667	0.126387	1	5.35	4.46	5.4	4.19	4.73	5.63	4.96	0.511267
	16	3	9.68	3.08	6.03	4.3	123.4	5.86107	7.23256	12.75		2	2.83	3.15	2.88	3.22	2.76	2.8	2.94	0.03804	2	5.72	4.42	5.19	5.3	5.85	5.3	5.29667	0.702707
	17	1	9.63	2.96	5.63	4.12	120.5	6.00635	7.23765	12.61		3	3.1	3.54	3.16	3.22	3.25	3.08	3.225	0.02815	3	4.3	4.46	4.62	4.95	4.45	6.03	4.80167	0.411177
	18	2	9.75	2.8	5.3	4.61	130.5	6.24836	8.15411	12.82									3.04389									5.01944
			9.72944	3.04389	5.01944	3.99667	121.861	6.29803	7.6967	12.6911
												Harmfull Nitrogen							Mean		Dry Matter							Mean
												1	4.1	4.59	4.73	3.3	4.14	4.12	4.16333	0.496467	1	12.85	12.72	12.64	12.88	12.07	12.61	12.6283	0.0866167
							2193.5					2	3.98	3.1	4.07	3.04	4.43	4.61	3.87167	0.439017	2	13.58	13.44	12.7	11.94	13.82	12.82	13.05	0.48668
												3	3.24	3.98	4.01	4.38	3.82	4.3	3.955	0.16655	3	13.03	12.29	11.3	12.4	12.6	12.75	12.395	0.35627
																			3.99667									12.6911
[truncated: 26 more columns]

## Sheet: 2022 PM
	PM
												PM																		PM
	Serial Number	Subject Number	Digestion	Sodium	Potassium	Harmfull Nitrogen	Beet Yield	Refined Digestion	Refined Beet Yield	Dry Matter		Digestion							Mean		Beet Yield 10 M2							Mean		Sodium							Mean		Potassium							Mean		Refined Digestion
	1	1	17.26	0.79	5.15	1.78	71.8	14.7653	10.6015	20.72		1	17.26	18.7	17.74	17.27	18.11	18.54	17.9367	0.383547	1	71.8	64.7	73	68.1	71.8	81.4	71.8	31.54	1	0.79	0.38	0.43	0.49	0.68	0.35	0.4875	0.0312	1	5.15	4.23	4.75	4.98	4.42	4.24	4.5925	0.152697	1	14.7653
	2	2	18.13	0.67	4.48	1.38	84.7	15.9438	13.5044	20.15		2	18.13	17.86	17.68	18.49	17.95	18.71	18.1367	0.154707	2	84.7	81.9	70.3	72.5	71.6	79	76.6667	36.1867	2	0.67	0.5	0.53	0.27	0.53	0.22	0.48	0.0297867	2	4.48	4.5	4.57	4.32	5.04	4.03	4.395	0.10992	2	15.9438
	3	3	18.87	0.48	3.96	1.2	76.2	16.9443	12.9115	20.29		3	18.87	17.89	18.82	18.14	17.99	18.86	18.4283	0.219977	3	76.2	76.2	66.4	79.9	90.5	68	76.2	76.292	3	0.48	0.53	0.34	0.66	0.3	0.3	0.4125	0.02143	3	3.96	4.68	4.37	4.98	4.8	4.67	4.42	0.130987	3	16.9443
	4	2	17.86	0.5	4.5	1.39	81.9	15.7243	12.8782	19.96									18.1672									74.8889									0.46									4.46917
	5	3	17.89	0.53	4.68	1.24	76.2	15.6964	11.9607	20.57
	6	1	18.7	0.38	4.23	1.24	64.7	16.7122	10.8128	20.77
	7	2	17.68	0.53	4.57	1.32	70.3	15.5166	10.9082	21.23		Refined Digestion							Mean		Refined Beet Yield							Mean		Harmfull Nitrogen									Dry Matter
	8	1	17.74	0.43	4.75	1.18	73	15.5623	11.3605	19.87		1	14.7653	16.7122	15.5623	14.9684	15.9429	16.5628	15.7523	0.647897	1	10.6015	10.8128	11.3605	10.1935	11.447	13.4821	11.3162	1.34702	1	1.78	1.24	1.18	1.44	1.36	1.2	1.35	0.0509867	1	20.72	20.77	19.87	19.05	20.6	19.61	20.2425	0.495747
	9	3	18.82	0.34	4.37	1.27	66.4	16.7951	11.1519	21.71		2	15.9438	15.7243	15.5166	16.5081	15.6216	16.8607	16.0292	0.289976	2	13.5044	12.8782	10.9082	11.9684	11.1851	13.32	12.2941	1.22305	2	1.38	1.39	1.32	1.25	1.36	1.08	1.2925	0.0138667	2	20.15	19.96	21.23	20.53	19.95	20.6	20.485	0.240867
	10	1	17.27	0.49	4.98	1.44	68.1	14.9684	10.1935	19.05		3	16.9443	15.6964	16.7951	15.7698	15.8266	16.744	16.296	0.345364	3	12.9115	11.9607	11.1519	12.6001	14.3231	11.3859	12.3889	1.35564	3	1.2	1.24	1.27	1.55	1.32	1.29	1.25	0.0153367	3	20.29	20.57	21.71	20.17	20.1	20.6	20.7925	0.351947
	11	3	18.14	0.66	4.98	1.55	79.9	15.7698	12.6001	20.17									16.0259									11.9997									1.2975									20.5067
	12	2	18.49	0.27	4.32	1.25	72.5	16.5081	11.9684	20.53
	13	3	17.99	0.3	4.8	1.32	90.5	15.8266	14.3231	20.1
	14	2	17.95	0.53	5.04	1.36	71.6	15.6216	11.1851	19.95		Sodium							Mean		Potassium							Mean			ONLY VALUES WERE COPIED TO BE USED WHEN PRINTING
	15	1	18.11	0.68	4.42	1.36	71.8	15.9429	11.447	20.6		1	0.79	0.38	0.43	0.49	0.68	0.35	0.4875	0.0312	1	5.15	4.23	4.75	4.98	4.42	4.24	4.5925	0.152697
	16	3	18.86	0.3	4.67	1.29	68	16.744	11.3859	20.6		2	0.67	0.5	0.53	0.27	0.53	0.22	0.48	0.0297867	2	4.48	4.5	4.57	4.32	5.04	4.03	4.395	0.10992
	17	1	18.54	0.35	4.24	1.2	81.4	16.5628	13.4821	19.61		3	0.48	0.53	0.34	0.66	0.3	0.3	0.4125	0.02143	3	3.96	4.68	4.37	4.98	4.8	4.67	4.42	0.130987
	18	2	18.71	0.22	4.03	1.08	79	16.8607	13.32	20.6									0.46									4.46917
			18.1672	0.469444	4.565	1.325	74.8889	16.0259	11.9997	20.36
												Harmfull Nitrogen							Mean		Dry Matter							Mean
												1	1.78	1.24	1.18	1.44	1.36	1.2	1.35	0.0509867	1	22.62	20.77	19.87	19.05	20.6	19.61	20.7175	1.56608
							1348					2	1.38	1.39	1.32	1.25	1.36	1.08	1.2925	0.0138667	2	20.15	19.96	21.23	20.53	19.95	20.6	20.485	0.240867
												3	1.2	1.24	1.27	1.55	1.32	1.29	1.25	0.0153367	3	20.29	20.57	21.71	20.17	20.1	20.6	20.7925	0.351947
																			1.2975									20.665
[truncated: 26 more columns]

## Sheet: 2023 CLS)
	CLS
												CLS																		CLS
	Serial Number	Subject Number	Digestion	Sodium	Potassium	Harmfull Nitrogen	Beet Yield	Refined Digestion	Refined Beet Yield	Dry Matter		Digestion							Mean		Beet Yield 10 M2							Mean		Sodium							Mean		Potassium							Mean		Refined Digestion
	1	1	10.48	4.55	3.89	2.99	105.8	7.01402	7.42083	12.95		1	10.48	10.99	11.05	11.08	11.09	11.14	10.9717	0.0604567	1	105.8	101.3	105.3	106.2	103.8	100.9	103.883	5.32567	1	4.55	4.68	3.48	4.4	4.67	4.63	4.335	0.214617	1	3.89	4.3	3.55	3.78	3.84	3.97	3.9275	0.0609367	1	7.01402
	2	2	10.49	4.51	3.38	3.72	118.6	7.14405	8.47284	13.1		2	10.49	11.91	11.76	10.97	11.95	11.39	11.4117	0.340897	2	118.6	112.3	106.2	124.7	106.1	121.4	114.883	62.3737	2	4.51	3.59	4.12	4.04	3.85	4.76	4.245	0.18363	2	3.38	3.91	3.73	3.57	3.71	3.95	3.7425	0.0452967	2	7.14405
	3	3	11.18	4.23	4.14	4.3	128.1	7.61489	9.75467	12.9		3	11.18	10.98	11.17	11.63	11.54	11.53	11.3383	0.0688567	3	128.1	105.2	100.4	111.4	105.3	103.7	109.017	100.15	3	4.23	4.38	4.12	4.46	4.24	4.94	4.4175	0.08567	3	4.14	3.87	4.23	3.84	3.62	3.84	4.02	0.0499467	3	7.61489
	4	2	11.91	3.59	3.91	3.51	112.3	8.71756	9.78982	14.99									11.2406									109.261									4.3325									3.89667
	5	3	10.98	4.38	3.87	3.54	105.2	7.52749	7.91892	13.88
	6	1	10.99	4.68	4.3	3.98	101.3	7.24574	7.33993	13.98
	7	2	11.76	4.12	3.73	3.58	106.2	8.44093	8.96427	14.46		Refined Digestion							Mean		Refined Beet Yield							Mean		Harmfull Nitrogen									Dry Matter
	8	1	11.05	3.48	3.55	3.29	105.3	8.03945	8.46554	12.79		1	7.01402	7.24574	8.03945	7.7032	7.54173	7.52138	7.51092	0.126921	1	7.42083	7.33993	8.46554	8.1808	7.82832	7.58907	7.80408	0.197714	1	2.99	3.98	3.29	2.99	3.61	4.03	3.5725	0.217137	1	12.95	13.98	12.79	12.38	13.7	13.65	13.3425	0.390697
	9	3	11.17	4.12	4.23	3.78	100.4	7.66063	7.69127	13.16		2	7.14405	8.71756	8.44093	7.75393	8.71536	7.82483	8.09944	0.397121	2	8.47284	9.78982	8.96427	9.66915	9.247	9.49934	9.27374	0.242302	2	3.72	3.51	3.58	3.36	3.74	3.06	3.4675	0.06511	2	13.1	14.99	14.46	14.19	14.63	13.51	14.015	0.509147
	10	1	11.08	4.4	3.78	2.99	106.2	7.7032	8.1808	12.38		3	7.61489	7.52749	7.66063	8.1171	8.22032	7.90886	7.84155	0.0813331	3	9.75467	7.91892	7.69127	9.04245	8.656	8.20149	8.54413	0.592382	3	4.3	3.54	3.78	4	3.55	3.4	3.755	0.114337	3	12.9	13.88	13.16	14.47	14.39	13.01	13.2375	0.49675
	11	3	11.63	4.46	3.84	4	111.4	8.1171	9.04245	14.47									7.8173									8.54065									3.59833									13.5317
	12	2	10.97	4.04	3.57	3.36	124.7	7.75393	9.66915	14.19
	13	3	11.54	4.24	3.62	3.55	105.3	8.22032	8.656	14.39
	14	2	11.95	3.85	3.71	3.74	106.1	8.71536	9.247	14.63		Sodium							Mean		Potassium							Mean			ONLY VALUES WERE COPIED TO BE USED WHEN PRINTING
	15	1	11.09	4.67	3.84	3.61	103.8	7.54173	7.82832	13.7		1	4.55	4.68	3.48	4.4	4.67	4.63	4.40167	0.214617	1	3.89	4.3	3.55	3.78	3.84	3.97	3.88833	0.0609367
	16	3	11.53	4.94	3.84	3.4	103.7	7.90886	8.20149	13.01		2	4.51	3.59	4.12	4.04	3.85	4.76	4.145	0.18363	2	3.38	3.91	3.73	3.57	3.71	3.95	3.70833	0.0452967
	17	1	11.14	4.63	3.97	4.03	100.9	7.52138	7.58907	13.65		3	4.23	4.38	4.12	4.46	4.24	4.94	4.395	0.08567	3	4.14	3.87	4.23	3.84	3.62	3.84	3.92333	0.0499467
	18	2	11.39	4.76	3.95	3.06	121.4	7.82483	9.49934	13.51									4.31389									3.84
			11.2406	4.31389	3.84	3.57944	109.261	7.8173	8.54065	13.6744
												Harmfull Nitrogen							Mean		Dry Matter							Mean
												1	2.99	3.98	3.29	2.99	3.61	4.03	3.48167	0.217137	1	12.95	13.98	12.79	12.38	13.7	13.65	13.2417	0.390697
							1966.7					2	3.72	3.51	3.58	3.36	3.74	3.06	3.495	0.06511	2	13.1	14.99	14.46	14.19	14.63	13.51	14.1467	0.509147
												3	4.3	3.54	3.78	4	3.55	3.4	3.76167	0.114337	3	12.9	13.88	13.16	14.47	14.39	13.01	13.635	0.49675
																			3.57944									13.6744
[truncated: 26 more columns]

## Sheet: 2023 PM
	PM
												PM																		PM
	Serial Number	Subject Number	Digestion	Sodium	Potassium	Harmfull Nitrogen	Beet Yield	Refined Digestion	Refined Beet Yield	Dry Matter		Digestion							Mean		Beet Yield 10 M2							Mean		Sodium							Mean		Potassium							Mean		Refined Digestion
	1	1	17.82	1.99	7.59	6.25	100.3	13.6566	13.6975	19.53		1	17.82	17.18	17.64	19.21	19.17	17.48	18.0833	0.779227	1	100.3	111.8	110.4	102	108.6	116.9	108.333	38.8787	1	1.99	1.78	1.61	1.16	1.18	1.49	1.7175	0.10827	1	7.59	6.36	6.58	6.94	5.76	6.11	6.66	0.417627	1	13.6566
	2	2	17.11	1.8	7.06	5.72	115.6	13.2433	15.3093	19.89		2	17.11	17.17	18.25	19.31	19.04	17.59	18.0783	0.894497	2	115.6	137.3	125.4	126.4	122.7	125.4	125.467	49.1827	2	1.8	1.37	1.37	1.21	1.12	1.41	1.4875	0.0548	2	7.06	6.53	7.34	6.58	6.59	5.65	6.645	0.33267	2	13.2433
	3	3	18.37	1.37	6.17	5.08	123.7	15.0163	18.5751	21.08		3	18.37	17.87	18.32	18.24	18.2	18.41	18.235	0.03811	3	123.7	124	127.9	123.8	118.6	125.4	123.9	9.28	3	1.37	1.43	1.3	1.11	1.12	1.62	1.43	0.03779	3	6.17	6.36	5.98	6.02	7.16	6.17	6.17	0.19144	3	15.0163
	4	2	17.17	1.37	6.53	5.77	137.3	13.6279	18.7111	21.96									18.1322									119.233									1.545									6.49167
	5	3	17.87	1.43	6.36	5.36	124	14.4042	17.8612	22.58
	6	1	17.18	1.78	6.36	5.93	111.8	13.5406	15.1383	21.69
	7	2	18.25	1.37	7.34	6.69	125.4	14.3436	17.9869	23.72		Refined Digestion							Mean		Refined Beet Yield							Mean		Harmfull Nitrogen									Dry Matter
	8	1	17.64	1.61	6.58	6.04	110.4	13.9731	15.4263	22.51		1	13.6566	13.5406	13.9731	15.5476	16.0258	14.1104	14.4757	1.09669	1	13.6975	15.1383	15.4263	15.8586	17.404	16.495	15.67	1.59117	1	6.25	5.93	6.04	6.32	5.04	5.03	5.8125	0.342377	1	19.53	21.69	22.51	24.28	22.86	20.96	21.1725	2.69438
	9	3	18.32	1.3	5.98	5.36	127.9	15.0291	19.2222	22.94		2	13.2433	13.6279	14.3436	15.8385	15.6044	14.4695	14.5212	1.07479	2	15.3093	18.7111	17.9869	20.0199	19.1467	18.1448	18.2198	2.57436	2	5.72	5.77	6.69	5.42	5.33	4.35	5.6325	0.576427	2	19.89	21.96	23.72	22.52	22.07	20.99	21.64	1.71742
	10	1	19.21	1.16	6.94	6.32	102	15.5476	15.8586	24.28		3	15.0163	14.4042	15.0291	15.0476	14.5116	14.9987	14.8346	0.0865417	3	18.5751	17.8612	19.2222	18.6289	17.2108	18.8084	18.3844	0.525814	3	5.08	5.36	5.36	4.86	5.94	4.78	5.145	0.17996	3	21.08	22.58	22.94	23.27	23.76	21.87	22.1175	0.950427
	11	3	18.24	1.11	6.02	4.86	123.8	15.0476	18.6289	23.27									14.6105									17.4247									5.53									21.6433
	12	2	19.31	1.21	6.58	5.42	126.4	15.8385	20.0199	22.52
	13	3	18.2	1.12	7.16	5.94	118.6	14.5116	17.2108	23.76
	14	2	19.04	1.12	6.59	5.33	122.7	15.6044	19.1467	22.07		Sodium							Mean		Potassium							Mean			ÇIKTI ALIRKEN KULLIILMAK ÜZERE SADECE DEĞERLER KOPYALIDI
	15	1	19.17	1.18	5.76	5.04	108.6	16.0258	17.404	22.86		1	1.99	1.78	1.61	1.16	1.18	1.49	4.55	0.38891	1	7.59	6.36	6.58	6.94	5.76	6.11	3.9275	0.0609367
	16	3	18.41	1.62	6.17	4.78	125.4	14.9987	18.8084	21.87		2	1.8	1.37	1.37	1.21	1.12	1.41	4.245	0.18363	2	7.06	6.53	7.34	6.58	6.59	5.65	3.7425	0.0452967
	17	1	17.48	1.49	6.11	5.03	116.9	14.1104	16.495	20.96		3	1.37	1.43	1.3	1.11	1.12	1.62	4.4175	0.08567	3	6.17	6.36	5.98	6.02	7.16	6.17	4.02	0.0499467
	18	2	17.59	1.41	5.65	4.35	125.4	14.4695	18.1448	20.99									4.40417									3.89667
			18.1322	1.41333	6.49722	5.515	119.233	14.6105	17.4247	22.1378
												Harmfull Nitrogen							Mean		Dry Matter							Mean
												1	6.25	5.93	6.04	6.32	5.04	5.03	3.5725	0.217137	1	19.53	21.69	22.51	24.28	22.86	20.96	21.1725	2.69438
							2146.2					2	5.72	5.77	6.69	5.42	5.33	4.35	3.4675	0.06511	2	19.89	21.96	23.72	22.52	22.07	20.99	21.64	1.71742
												3	5.08	5.36	5.36	4.86	5.94	4.78	3.755	0.114337	3	21.08	22.58	22.94	23.27	23.76	21.87	22.1175	0.950427
																			3.59833									21.6433
[truncated: 26 more columns]

## Sheet: 2022 PM (Raw Value)
PriKey	Date	Sample_Id	Polarisation	Pol_Temp	Sodium	Potassium	Amino_Nitrogen	Glucose	Gluc_Temp	Alcalinity	Sugar_Content	Sugar_Yield	Molasses	Formula	Operator	aN_corrected
1	2022-11-14 15:07:59	1	17.26	21.5	0.79	5.15	1.78	22.62	0	83	14.77	12.26	1.89	Reinefeld & Winner		1.78
2	2022-11-14 15:08:38	2	18.13	20.8	0.67	4.48	1.38	20.15	0	84.7	15.94	13.5	1.59	Reinefeld & Winner		1.38
3	2022-11-14 15:09:15	3	18.87	20.5	0.48	3.96	1.2	20.29	0	57.5	16.94	9.74	1.33	Reinefeld & Winner		1.2
4	2022-11-14 15:09:57	4/2	17.86	20.5	0.5	4.5	1.39	19.96	0	81.9	15.72	12.88	1.54	Reinefeld & Winner		1.39
5	2022-11-14 15:10:35	5/3	17.89	20.5	0.53	4.68	1.24	20.57	0	62.3	15.7	9.78	1.59	Reinefeld & Winner		1.24
6	2022-11-14 15:11:17	6/1	18.7	20.7	0.38	4.23	1.24	20.77	0	63.7	16.71	10.65	1.39	Reinefeld & Winner		1.24
7	2022-11-14 15:11:54	7/2	17.68	20.8	0.53	4.57	1.32	21.23	0	68.3	15.52	10.6	1.56	Reinefeld & Winner		1.32
8	2022-11-14 15:12:33	8/1	17.74	20.9	0.43	4.75	1.18	19.87	0	73	15.56	11.36	1.58	Reinefeld & Winner		1.18
9	2022-11-14 15:13:18	9/3	18.82	20.9	0.34	4.37	1.27	21.71	0	55.4	16.8	9.3	1.42	Reinefeld & Winner		1.27
10	2022-11-14 15:14:02	10/1	17.27	20.9	0.49	4.98	1.44	19.05	0	65.1	14.97	9.74	1.7	Reinefeld & Winner		1.44
11	2022-11-14 15:14:36	11/3	18.14	20.5	0.66	4.98	1.55	20.17	0	75.9	15.77	11.97	1.77	Reinefeld & Winner		1.55
12	2022-11-14 15:15:16	12/2	18.49	20	0.27	4.32	1.25	20.53	0	70.5	16.51	11.64	1.38	Reinefeld & Winner		1.25
13	2022-11-14 15:16:22	13/3	17.99	20	0.3	4.8	1.32	20.1	0	122.5	15.83	19.39	1.56	Reinefeld & Winner		1.32
14	2022-11-14 15:17:12	14/2	17.95	19.9	0.53	5.04	1.36	19.95	0	66.6	15.62	10.4	1.73	Reinefeld & Winner		1.36
15	2022-11-14 15:17:56	15/1	18.11	19.9	0.68	4.42	1.36	20.6	0	62.2	15.94	9.92	1.57	Reinefeld & Winner		1.36
16	2022-11-14 15:18:36	16/3	18.86	19.9	0.3	4.67	1.29	20.6	0	45	16.74	7.53	1.52	Reinefeld & Winner		1.29
17	2022-11-14 15:19:21	17/1	18.54	19.9	0.35	4.24	1.2	19.61	0	79.4	16.56	13.15	1.38	Reinefeld & Winner		1.2
18	2022-11-14 15:20:24	18/2	18.71	19.9	0.22	4.03	1.08	20.6	0	78	16.86	13.15	1.25	Reinefeld & Winner		1.08

## Sheet: 2022 CLS (Raw Value)
PriKey	Date	Sample_Id	Polarisation	Pol_Temp	Sodium	Potassium	Amino_Nitrogen	Glucose	Gluc_Temp	Alcalinity	Sugar_Content	Sugar_Yield	Molasses	Formula	Operator	aN_corrected
1	2022-10-28 09:22:33	1	10.33	22.4	2.73	5.35	2.96	12.85	0	112.7	6.99	7.88	2.74	Reinefeld & Winner		2.96
2	2022-10-28 09:23:15	2	10.65	21.4	2.83	5.72	3.98	13.58	0	136	7.05	9.59	3	Reinefeld & Winner		3.98
3	2022-10-28 09:24:28	3	10.25	21.2	3.1	4.3	3.24	13.03	0	166.4	7.12	11.84	2.53	Reinefeld & Winner		3.24
4	2022-10-28 09:25:07	4/2	10.72	21.1	3.15	4.42	3.1	13.44	0	87.8	7.54	6.62	2.58	Reinefeld & Winner		3.1
5	2022-10-28 09:25:46	5/3	9.34	21.1	3.54	4.46	3.98	12.29	0	143.4	5.93	8.51	2.81	Reinefeld & Winner		3.98
6	2022-10-28 09:26:31	6/1	9.49	21.1	3.23	4.46	4.59	12.72	0	113.1	6.13	6.93	2.76	Reinefeld & Winner		4.59
7	2022-10-28 09:27:11	7/2	9.39	21	2.88	5.19	4.07	12.7	0	117.2	5.95	6.97	2.84	Reinefeld & Winner		4.07
8	2022-10-28 09:28:17	8/1	9.45	21.1	2.38	6.02	4.73	12.64	0	103.1	5.83	6.02	3.02	Reinefeld & Winner		4.73
9	2022-10-28 09:33:59	9/3	9.25	21.8	3.16	4.62	4.01	11.3	0	119.5	5.91	7.07	2.74	Reinefeld & Winner		4.01
10	2022-10-28 09:36:53	10/1	10.16	22	3.28	4.19	3.3	12.88	0	119.2	7	8.34	2.56	Reinefeld & Winner		3.3
11	2022-10-28 09:47:48	11/3	9.31	22.7	3.22	4.95	4.38	12.4	0	128	5.81	7.43	2.9	Reinefeld & Winner		4.38
12	2022-10-28 09:48:34	12/2	9.48	21.9	3.22	3.89	3.04	11.94	0	109.8	6.47	7.1	2.41	Reinefeld & Winner		3.04
13	2022-10-28 09:50:22	13/3	9.87	21.9	3.25	4.45	3.82	12.6	0	123.9	6.58	8.15	2.69	Reinefeld & Winner		3.82
14	2022-10-28 09:53:07	14/2	10.4	22	2.76	5.85	4.43	13.82	0	140.9	6.74	9.5	3.06	Reinefeld & Winner		4.43
15	2022-10-28 09:57:16	15/1	9.47	22.3	3.22	4.73	4.14	12.07	0	97.8	6.06	5.93	2.81	Reinefeld & Winner		4.14
16	2022-10-28 10:00:01	16/3	9.68	22.3	3.08	6.03	4.3	12.75	0	123.4	5.86	7.23	3.22	Reinefeld & Winner		4.3
17	2022-10-28 10:00:49	17/1	9.63	22	2.96	5.63	4.12	12.61	0	120.5	6.01	7.24	3.02	Reinefeld & Winner		4.12
18	2022-10-28 10:01:55	18/2	9.75	22.1	2.8	5.91	4.61	12.82	0	130.5	6.04	7.88	3.11	Reinefeld & Winner		4.61

## Sheet: 2023 PM (Raw Value)
PriKey	Date	Sample_Id	Polarisation	Pol_Temp	Sodium	Potassium	Amino_Nitrogen	Glucose	Gluc_Temp	Alcalinity	Sugar_Content	Sugar_Yield	Molasses	Formula	Operator	aN_corrected
1	2023-10-30 08:17:48	1	16.25	22.7	1.99	7.59	6.25	19.53	0	99.3	12.09	12	3.56	Reinefeld & Winner		6.25
2	2023-10-30 08:18:55	2	17.11	22.6	1.8	7.06	5.72	19.89	0	113.1	13.24	14.98	3.27	Reinefeld & Winner		5.72
3	2023-10-30 08:19:57	3	15.59	22.4	1.37	6.17	5.08	21.08	0	113.4	12.24	13.88	2.75	Reinefeld & Winner		5.08
4	2023-10-30 08:21:05	4/2	17.17	22.5	1.37	6.53	5.77	21.96	0	131.7	13.63	17.95	2.94	Reinefeld & Winner		5.77
5	2023-10-30 08:22:49	5/3	17.87	22.8	1.43	6.36	5.36	22.58	0	128.7	14.4	18.54	2.87	Reinefeld & Winner		5.36
6	2023-10-30 08:23:56	6/1	17.18	22.8	1.78	6.36	5.93	21.69	0	110.6	13.54	14.98	3.04	Reinefeld & Winner		5.93
7	2023-10-30 08:26:15	7/2	18.25	22.8	1.37	7.34	6.69	23.72	0	94.3	14.34	13.53	3.31	Reinefeld & Winner		6.69
8	2023-10-30 08:27:55	8/1	17.64	22.7	1.61	6.58	6.04	22.51	0	104.9	13.97	14.66	3.07	Reinefeld & Winner		6.04
9	2023-10-30 08:30:31	9/3	18.32	22.8	1.3	5.98	5.36	22.94	0	117.3	15.03	17.63	2.69	Reinefeld & Winner		5.36
10	2023-10-30 08:32:10	10/1	19.21	22.8	1.16	6.94	6.32	24.28	0	92.7	15.55	14.41	3.06	Reinefeld & Winner		6.32
11	2023-10-30 08:39:02	11/3	19.53	23.6	1.11	6.02	4.86	23.27	0	87	16.34	14.21	2.59	Reinefeld & Winner		4.86
12	2023-10-30 08:40:21	12/2	19.31	23.1	1.21	6.58	5.42	22.52	0	116.6	15.84	18.47	2.87	Reinefeld & Winner		5.42
13	2023-10-30 08:42:57	13/3	20.48	23.1	1.12	7.16	5.94	23.76	0	111.3	16.79	18.69	3.09	Reinefeld & Winner		5.94
14	2023-10-30 08:46:59	14/2	19.04	23.4	1.12	6.59	5.33	22.07	0	114.4	15.6	17.85	2.84	Reinefeld & Winner		5.33
15	2023-10-30 08:52:50	15/1	19.17	23.8	1.18	5.76	5.04	22.86	0	108.6	16.03	17.4	2.54	Reinefeld & Winner		5.04
16	2023-10-30 08:57:30	16/3	18.41	23.9	1.62	6.17	4.78	21.87	0	115	15	17.25	2.81	Reinefeld & Winner		4.78
17	2023-10-30 08:58:30	17/1	17.48	23.3	1.49	6.11	5.03	20.96	0	110	14.11	15.52	2.77	Reinefeld & Winner		5.03
18	2023-10-30 09:00:18	18/2	17.59	23.1	1.41	5.65	4.35	20.99	0	129	14.47	18.67	2.52	Reinefeld & Winner		4.35

## Sheet: 2023 CLS (Raw Value)
PriKey	Date	Sample_Id	Polarisation	Pol_Temp	Sodium	Potassium	Amino_Nitrogen	Glucose	Gluc_Temp	Alcalinity	Sugar_Content	Sugar_Yield	Molasses	Formula	Operator	aN_corrected
1	2023-10-27 16:27:42	1	10.48	26.4	5.41	3.89	2.99	12.95	0	105.8	6.72	7.11	3.16	Reinefeld & Winner		2.99
2	2023-10-27 16:28:28	2	10.49	25.4	4.51	3.38	3.72	13.1	0	118.6	7.14	8.47	2.75	Reinefeld & Winner		3.72
3	2023-10-27 16:29:17	3	10.21	24.9	4.23	4.14	4.3	12.9	0	128.1	6.64	8.51	2.97	Reinefeld & Winner		4.3
4	2023-10-27 16:30:01	4/2	11.91	24.9	3.59	3.91	3.51	14.99	0	112.3	8.72	9.79	2.59	Reinefeld & Winner		3.51
5	2023-10-27 16:40:39	5/3	10.98	27.3	4.38	3.87	3.54	13.88	0	105.2	7.53	7.92	2.85	Reinefeld & Winner		3.54
6	2023-10-27 16:45:53	6/1	10.99	26.9	4.68	4.3	3.98	13.98	0	101.3	7.25	7.34	3.14	Reinefeld & Winner		3.98
7	2023-10-27 16:49:23	7/3	11.76	26.2	4.12	3.73	3.58	14.46	0	106.2	8.44	8.96	2.72	Reinefeld & Winner		3.58
8	2023-10-27 16:50:30	8/2	11.05	25.1	3.48	3.55	3.29	12.79	0	105.3	8.04	8.47	2.41	Reinefeld & Winner		3.29
9	2023-10-27 16:51:25	9/1	11.17	24.7	4.12	4.23	3.78	13.16	0	100.4	7.66	7.69	2.91	Reinefeld & Winner		3.78
10	2023-10-27 16:52:32	10/1	11.08	24.7	4.4	3.78	2.99	12.38	0	106.2	7.7	8.18	2.78	Reinefeld & Winner		2.99
11	2023-10-30 07:43:25	11/3	11.63	22.4	4.46	3.84	4	14.47	0	111.4	8.12	9.04	2.91	Reinefeld & Winner		4
12	2023-10-30 07:44:38	12/2	10.97	22	4.04	3.57	3.36	14.19	0	124.7	7.75	9.67	2.62	Reinefeld & Winner		3.36
13	2023-10-30 07:46:15	13/3	11.54	21.9	4.24	3.62	3.55	14.39	0	105.3	8.22	8.66	2.72	Reinefeld & Winner		3.55
14	2023-10-30 07:49:32	14/2	11.95	22.2	3.85	3.71	3.74	14.63	0	106.1	8.72	9.25	2.63	Reinefeld & Winner		3.74
15	2023-10-30 07:52:36	15/1	11.09	22.3	4.67	3.84	3.61	13.7	0	114.3	7.54	8.62	2.95	Reinefeld & Winner		3.61
16	2023-10-30 07:59:18	16/3	11.53	22.6	4.94	3.84	3.4	13.01	0	103.7	7.91	8.2	3.02	Reinefeld & Winner		3.4
17	2023-10-30 08:00:22	17/1	11.14	22.3	4.63	3.97	4.03	13.65	0	100.9	7.52	7.59	3.02	Reinefeld & Winner		4.03
18	2023-10-30 08:04:50	18/2	11.39	22.6	4.76	3.95	3.06	13.51	0	121.4	7.82	9.5	2.97	Reinefeld & Winner		3.06

## Sheet: 2022 PM (Result Table)
		Trial Result Table
		Trial Name:					2022
		PM
		Subjects				PM	CLS
		1				67.945	85.63	A
		2				53.41	53.525	B
		3				53.97	57.21	B
		F Value	Table	%5	4.1	2.6945	117,9229 **
				%1	7.56
		L.S.D.			%5		5.09774
					%1		7.25078
		F.17.01/00/04.05.2021

## Sheet: 2022 CLS (Result Table)
		Trial Result Table
		Trial Name:							Location:			Year:
		CLS							YENİŞEHİR			2022
		Subjects				Beet Yield kg/da	Digestion (%)	Purity (%)	Sodium Meq Na/100g	Potassium Meq K/100g	Harmful Nitrogen Meq N/100g	Refined Digestion (%)	Refined Sugar Yield kg/da	Dry Matter (%)
		1				11107	9.51	75.2969	2.97	4.96	4.16	6.11	679	12.63
		2				12688	10.07	77.1648	2.94	5.3	3.87	6.59	839	13.05
		3				12763	9.62	77.5806	3.23	4.8	3.96	6.2	791	12.4
		F Value	Table	%5	4.1	5,214 *	4,152 *		4.064	1.445	0.463	1.969	5,270 *	2.226
				%1	7.56
		L.S.D.			%5	1290.99	0.457187						113.21
					%1	1836.25	0.65028						161.024
						12186	9.73333	76.6808	3.04667	5.02	3.99667	6.3	769.667	12.6933
		F.17.01/00/04.05.2021
		Trial Result Table
		Trial Name:							Location:			Year:
		PM							ESKİŞEHİR			2022
		Subjects				Beet Yield kg/da	Digestion (%)	Purity (%)	Sodium Meq Na/100g	Potassium Meq K/100g	Harmful Nitrogen Meq N/100g	Refined Digestion (%)	Refined Sugar Yield kg/da	Dry Matter (%)
		1				7180	17.94	89.2537	0.52	4.63	1.37	15.75	1132	20.1
		2				7667	18.14	88.9216	0.45	4.49	1.3	16.03	1229	20.4
		3				7620	18.43	89.5965	0.44	4.58	1.31	16.3	1239	20.57
		F Value	Table	%5	4.1	0.741	1.36		0.561	0.192	0.32	0.986	1.447	0.906
				%1	7.56
		L.S.D.			%5
					%1
						7489	18.17	89.2573	0.47	4.56667	1.32667	16.0267	1200	20.3567
		F.17.01/00/04.05.2021

[truncated: 2 more sheets: 2023 PM (Result Table), 2023 CLS (Result Table)]
